# Supplementary material for: An inhibitory gate for state transition in cortex
Source: eLife. 2017 May 16;6:e26177. doi: 10.7554/eLife.26177 (PMC5444901; doi:10.7554/eLife.26177)
Supplement: Figure 1—figure supplement 1—source data 1. — DOI: http://dx.doi.org/10.7554/eLife.26177.005 [file elife-26177-fig1-figsupp1-data1.xlsx]

## Sheet: Sheet1
Figure 1 - Figure Supplement 1 - Source Data 1
Title:	Source data 1: Source data for Up and Down state detection from the LFP signal.
AUC evaluation as a function of low frequency bands considered for algorithm calibration (panel f)									AUC evaluation using various metrics or phase computation methods (panel g)					Evaluation of algorithm performance using the Scomb signal to identify Up and Down states (panel j)
AUC UP states	AUC DOWN states	Frequency band [Hz]							AUC UP states	AUC DOWN states	Instantaneous frequency computation method + high-frequency contribution [Hz]			TP_UP	FP_UP	TP_DOWN	FP_DOWN
0.85991	0.86137	<2; 2-4							0.84329	0.84488	<1; 1-3 Hilbert transf.			0.5962	0.10004	0.5693	0.11556
0.87127	0.87179	<2; 2-4							0.88445	0.88465	<1; 1-3 Hilbert transf.			0.83844	0.18438	0.44975	0.02582
0.88323	0.8851	<2; 2-4							0.89654	0.89882	<1; 1-3 Hilbert transf.			0.77374	0.13934	0.49375	0.03911
0.9493	0.95086	<2; 2-4							0.95699	0.96776	<1; 1-3 Hilbert transf.			0.70139	0.00608	0.76204	0.03274
0.94197	0.94443	<2; 2-4							0.95227	0.96281	<1; 1-3 Hilbert transf.			0.8623	0.04286	0.63842	0.02171
0.96288	0.96243	<2; 2-4							0.97455	0.98264	<1; 1-3 Hilbert transf.			0.72879	0.00576	0.80373	0.01553
0.8656	0.86518	<2; 2-4							0.92653	0.93095	<1; 1-3 Hilbert transf.			0.77796	0.05793	0.59194	0.01496
0.9037	0.90454	<2; 2-4							0.92856	0.93627	<1; 1-3 Hilbert transf.			0.62792	0.02202	0.75673	0.06102
0.93041	0.93303	<2; 2-4							0.9446	0.95472	<1; 1-3 Hilbert transf.			0.64158	0.01423	0.77345	0.03997
0.83604	0.83741	<2							0.84818	0.84855	<1; 1-3 Hilbert transf. + high frequencies
0.86006	0.86017	<2							0.90818	0.90802	<1; 1-3 Hilbert transf. + high frequencies
0.88871	0.88947	<2							0.89909	0.89986	<1; 1-3 Hilbert transf. + high frequencies
0.95709	0.96206	<2							0.97026	0.97319	<1; 1-3 Hilbert transf. + high frequencies
0.95248	0.95822	<2							0.96691	0.96941	<1; 1-3 Hilbert transf. + high frequencies
0.97516	0.97869	<2							0.98355	0.9866	<1; 1-3 Hilbert transf. + high frequencies
0.90584	0.90692	<2							0.95238	0.9532	<1; 1-3 Hilbert transf. + high frequencies
0.91845	0.92207	<2							0.94061	0.94299	<1; 1-3 Hilbert transf. + high frequencies
0.93499	0.94163	<2							0.95917	0.96317	<1; 1-3 Hilbert transf. + high frequencies
0.83148	0.83288	2-4							0.85922	0.85973	<1; 1-3 interpolation + high frequencies
0.80391	0.80511	2-4							0.89794	0.89767	<1; 1-3 interpolation + high frequencies
0.82269	0.82497	2-4							0.8866	0.88726	<1; 1-3 interpolation + high frequencies
0.79818	0.80112	2-4							0.95617	0.95714	<1; 1-3 interpolation + high frequencies
0.79181	0.79507	2-4							0.94913	0.94916	<1; 1-3 interpolation + high frequencies
0.74129	0.74268	2-4							0.97117	0.97144	<1; 1-3 interpolation + high frequencies
0.65569	0.65667	2-4							0.92065	0.92027	<1; 1-3 interpolation + high frequencies
0.7419	0.7439	2-4							0.91854	0.91842	<1; 1-3 interpolation + high frequencies
0.77783	0.78096	2-4							0.94559	0.94624	<1; 1-3 interpolation + high frequencies
0.75066	0.7509	<1
0.80959	0.80931	<1
0.82388	0.82419	<1
0.93375	0.93849	<1
0.93661	0.94116	<1
0.95716	0.96068	<1
0.88407	0.88599	<1
0.89511	0.8984	<1
0.90326	0.9082	<1
0.85889	0.86168	1-3
0.89027	0.8919	1-3
0.89228	0.89561	1-3
0.95393	0.96522	1-3
0.95139	0.96351	1-3
0.96921	0.97864	1-3
0.93331	0.93881	1-3
0.92889	0.9399	1-3
0.94331	0.95635	1-3
0.84329	0.84488	<1; 1-3
0.88445	0.88465	<1; 1-3
0.89654	0.89882	<1; 1-3
0.95699	0.96776	<1; 1-3
0.95227	0.96281	<1; 1-3
0.97455	0.98264	<1; 1-3
0.92653	0.93095	<1; 1-3
0.92856	0.93627	<1; 1-3
0.9446	0.95472	<1; 1-3
