# Supplementary material for: An inhibitory gate for state transition in cortex
Source: eLife. 2017 May 16;6:e26177. doi: 10.7554/eLife.26177 (PMC5444901; doi:10.7554/eLife.26177)
Supplement: Figure 1—source data 1. — DOI: http://dx.doi.org/10.7554/eLife.26177.003 [file elife-26177-fig1-data1.xlsx]

## Sheet: Sheet1
Figure 1 - Source data 1
Title:	Source data for the analysis of the firing activity of PV and SST interneurons during up and down states.
Percentage of spikes fired by PV interneurons during Up, Down and Indeterminate states (Pancel C)								Percentage of Up or Down states that displays firing activity from PV interneurons (Pancel D)								Average number of spikes fired from PV interneurons during an active Up or Down state (Pancel E)
Cell Number	% Spike Up	% Spike Down	% Spike Indet					Cell Number	% Active Up State	% Active Down State						Cell Number	# Spikes Up	# Spikes Down
Cell # 1	71.3483	5.89888	22.7528					Cell # 1	72.8302	13.3017						Cell # 1	9.10025	5.34043
Cell # 2	77.7152	3.58607	18.6988					Cell # 2	75.2525	10.9635						Cell # 2	5.41341	2.13333
Cell # 3	79.589	0.13932	20.2717					Cell # 3	84.9616	0.59259						Cell # 3	3.07351	1
Cell # 4	69.7034	7.109	23.1876					Cell # 4	76.0984	22.2222						Cell # 4	9.31198	3.30573
Cell # 5	86.5739	2.33498	11.0912					Cell # 5	85.7143	19.8198						Cell # 5	19.2137	2.34524
Cell # 6	53.6006	10.3192	36.0802					Cell # 6	79.5811	32.2751						Cell # 6	4.77117	2.17593
Cell # 7	49.5188	11.1325	39.3487					Cell # 7	80.027	39.3564						Cell # 7	4.97224	2.26639
Cell # 8	44.9426	11.8495	43.2079					Cell # 8	79.9127	33.4123						Cell # 8	4.86052	3.12016
Cell # 9	47.0588	17.4962	35.4449					Cell # 9	72.2222	41.9214						Cell # 9	3.69357	2.49148
Cell # 10	68.421	7.21248	24.3665					Cell # 10	70.5882	17.7778						Cell # 10	4.74259	2.375
Cell # 11	91.0638	0.85106	8.08511					Cell # 11	85.5422	3.6036						Cell # 11	3.97748	1
Cell # 12	86.7754	0.5813	12.6433					Cell # 12	97.561	6.20915						Cell # 12	13.94	1.79412
Cell # 13	98.1727	0.5041	1.32325					Cell # 13	96.9697	17.1429						Cell # 13	28.4143	1.3
Cell # 14	89.864	0.34014	9.79592					Cell # 14	92.6087	2.99401						Cell # 14	6.36633	1
Cell # 15	84.188	0.34722	15.4647					Cell # 15	97.868	2.61153						Cell # 15	13.4853	2.14286
Cell # 16	73.4894	1.67259	24.838					Cell # 16	95.6349	7.91075						Cell # 16	7.5668	2.15625
Percentage of spikes fired by SST interneurons during Up, Down and Indeterminate states (Pancel H)								Percentage of Up or Down states that displays firing activity from SST interneurons (Pancel I)								Average number of spikes fired from SST interneurons during an active Up or Down state (Pancel J)
Cell Number	% Spike Up	% Spike Down	% Spike Indet					Cell Number	% Active Up State	% Active Down State						Cell Number	# Spikes Up	# Spikes Down
Cell # 1	88.0645	0.32258	11.6129					Cell # 1	46.4187	0.30257						Cell # 1	1.47235	1
Cell # 2	74.4534	1.72612	23.8205					Cell # 2	70.7094	2.80899						Cell # 2	2.15689	1.37481
Cell # 3	79.0541	1.35135	19.5946					Cell # 3	29.4118	0.44643						Cell # 3	1.39268	2
Cell # 4	79.7235	4.14747	16.129					Cell # 4	37.7778	3.37079						Cell # 4	1.4	1
Cell # 5	93.4605	0.54496	5.99455					Cell # 5	43.8224	0.27322						Cell # 5	1.42667	1
Cell # 6	60.0451	3.24324	36.7117					Cell # 6	82.5175	8.73656						Cell # 6	1.90229	1.10333
Cell # 7	67.3469	2.04082	30.6122					Cell # 7	20.8	0.8						Cell # 7	1.09259	1
Cell # 8	61.4256	2.18628	36.3881					Cell # 8	93.3594	12.3016						Cell # 8	8.58266	2.29861
Cell # 9	45.2381	2.06349	52.6984					Cell # 9	54.6219	1.30719						Cell # 9	1.34297	1.09091
Cell # 10	63.8191	3.01508	33.1658					Cell # 10	41.6309	3.1746						Cell # 10	1.43617	1
Cell # 11	61.435	3.58744	34.9776					Cell # 11	29.4408	1.875						Cell # 11	1.661	1.77778
Cell # 12	69.6629	1.1236	29.2135					Cell # 12	15	0.3413						Cell # 12	1.125	1
Cell # 13	68.4685	3.6036	27.9279					Cell # 13	15.9763	1.42857						Cell # 13	1.41	1.33333
Cell # 14	73.2284	9.44882	17.3228					Cell # 14	25	5.41667						Cell # 14	1.15301	1
Cell # 15	71.7391	8.69565	19.5652					Cell # 15	19.4842	3.1746						Cell # 15	1.03448	1
Cell # 16	100	0	0					Cell # 16	31.4961	0						Cell # 16	1.03571
Cell # 17	76.4706	3.18627	20.3431					Cell # 17	52.6427	2.89855						Cell # 17	1.20592	1.27778
Cell # 18	66.5635	5.26316	28.1734					Cell # 18	33.871	5.10949						Cell # 18	1.48727	1.20833
Cell # 19	76.6129	2.41935	20.9677					Cell # 19	21.1488	1.01695						Cell # 19	1.15333	1
