# Supplementary material for: An inhibitory gate for state transition in cortex
Source: eLife. 2017 May 16;6:e26177. doi: 10.7554/eLife.26177 (PMC5444901; doi:10.7554/eLife.26177)
Supplement: Figure 2—source data 1. — DOI: http://dx.doi.org/10.7554/eLife.26177.007 [file elife-26177-fig2-data1.xlsx]

## Sheet: Sheet1
Figure 2 - Source Data 1
Title:	Source data for the analysis of the preferred phase of firing for PV and SST interneurons.
Preferred phase of firing of PV interneurons for τ = 0 (panel c)						Preferred phase of firing of PV interneurons for τ = τmax (panel e, left)							Preferred phase of firing of PV interneurons for τ = τmax (panel e, right)
Cell Number	25th Percentile	Median	75th Percentile			Cell Number	25th Percentile	Median	75th Percentile				Cell Number	25th Percentile	Median	75th Percentile
Cell #1	148.37	195.59	244.72			Cell #1	147.35	193.93	242.63				Cell #1	148.37	195.59	244.72
Cell #2	145.04	190.83	235.83			Cell #2	153.99	202.08	247.79				Cell #2	163.62	210.65	259.41
Cell #3	125.08	159.53	197.78			Cell #3	137.2	171.11	209.73				Cell #3	144.96	179.29	218.63
Cell #4	124.27	166.81	213.93			Cell #4	160.38	200.2	242.61				Cell #4	183.28	228.11	272.04
Cell #5	149.71	186.3	223.67			Cell #5	171.99	207.1	242.96				Cell #5	205.82	241.83	281.36
Cell #6	120.47	174.47	230.28			Cell #6	139.92	194.45	248.98				Cell #6	162.63	217.75	273.95
Cell #7	91606	138.85	204.14			Cell #7	119.16	170.03	226.01				Cell #7	161.36	218.07	273.41
Cell #8	115.2	177.74	245.14			Cell #8	143.06	210.82	273.1				Cell #8	134.24	230.31	300.1
Cell #9	73026	132.61	208.34			Cell #9	116.25	171.44	235.44				Cell #9	165.77	231.41	289.16
Cell #10	125.59	184	235.75			Cell #10	208.7	254.69	293.94				Cell #10	192.56	272.08	312.63
Cell #11	138.56	178.18	207.27			Cell #11	173.9	206.75	234.99				Cell #11	190.14	222.63	254.38
Cell #12	102.49	139.29	179.62			Cell #12	124.51	162.47	202.18				Cell #12	140.05	178.32	221.21
Cell #13	105.12	156.45	206.5			Cell #13	134.66	189.18	228.56				Cell #13	154.14	208.58	250.28
Cell #14	102.16	141.08	183.64			Cell #14	114	153.45	193.35				Cell #14	131.43	172.11	214.8
Cell #15	141.2	177.71	217.98			Cell #15	152.64	189.21	228.97				Cell #15	163.85	200.68	240.51
Cell #16	132.6	176.23	219.77			Cell #16	151.35	193.46	236.2				Cell #16	165.68	207.19	251.78
Preferred phase of firing of SST interneurons for τ = 0 (panel i)						Preferred phase of firing of SST interneurons for τ = τmax (panel k, left)							Preferred phase of firing of SST interneurons for τ = τmax (panel k, right)
Cell Number	25th Percentile	Median	75th Percentile			Cell Number	25th Percentile	Median	75th Percentile				Cell Number	25th Percentile	Median	75th Percentile
Cell #1	145.71	179.43	217.55			Cell #1	159.35	191.77	229.92				Cell #1	185.08	220.72	256.46
Cell #2	130.31	168.8	213.77			Cell #2	149.73	188.76	231.21				Cell #2	178.59	219.15	262.09
Cell #3	142.53	200.7	228.62			Cell #3	174.25	216.17	249.38				Cell #3	209.85	292.01	328.34
Cell #4	135.68	169.19	216.96			Cell #4	155.79	190.5	231.46				Cell #4	167.2	197.21	242.43
Cell #5	147.61	188.15	219.39			Cell #5	145.45	185.05	216.71				Cell #5	147.61	188.15	219.39
Cell #6	110.91	172.42	228.56			Cell #6	137.25	194.65	250.91				Cell #6	154.84	213.18	270.43
Cell #7	131.23	178.44	224.7			Cell #7	146.09	192.45	238.81				Cell #7	168.94	216.27	264.67
Cell #8	98.77	131.54	180.89			Cell #8	133.58	163.96	214.27				Cell #8	164.04	193.82	247.3
Cell #9	92923	153.51	213.46			Cell #9	124.64	184.54	242.31				Cell #9	106.94	167.47	229.02
Cell #10	130.74	190.21	238.97			Cell #10	130.74	190.21	238.97				Cell #10	130.74	190.21	238.97
Cell #11	115.61	154.82	209.53			Cell #11	158.5	195.15	237.78				Cell #11	179.15	214.64	275.72
Cell #12	100.32	153.65	217.43			Cell #12	130.1	187.64	236.84				Cell #12	147.45	199.16	256.57
Cell #13	116.84	154.39	209.83			Cell #13	128.76	166.8	220.2				Cell #13	134.89	175.02	227.32
Cell #14	115.14	177.47	233.84			Cell #14	155.7	217.08	269.48				Cell #14	177.5	237.76	297.43
Cell #15	122.94	171.9	209.13			Cell #15	140.74	190.41	232.11				Cell #15	171.27	216.21	260.41
