# Supplementary material for: An inhibitory gate for state transition in cortex
Source: eLife. 2017 May 16;6:e26177. doi: 10.7554/eLife.26177 (PMC5444901; doi:10.7554/eLife.26177)
Supplement: Figure 2—source data 2. — DOI: http://dx.doi.org/10.7554/eLife.26177.008 [file elife-26177-fig2-data2.xlsx]

## Sheet: Sheet1
Figure 2 - Source Data 2
Title:	Source data for the analysis of the spike triggered phase speed velocity.
Phase Velocity for PV interneurons during Up state (panel f, upper)									Phase Velocity for PV interneurons during Down state (panel f, lower)								Phase Velocity for SST interneurons during Up state (panel l, upper)									Phase Velocity for SST interneurons during Down state (panel l, lower)
Spike Number	Pre	Post							Spike Number	Pre	Post						Spike Number	Pre	Post							Spike Number	Pre	Post
Spike #1	281.511	214.233							Spike #1	371.332	314.347						Spike #1	225.165	262.117							Spike #1	-6.50638	142.459
Spike #2	279.73	220.126							Spike #2	454.002	17.2111						Spike #2	119.4	126.868							Spike #2	98.3105	164.523
Spike #3	253.939	242.724							Spike #3	487.986	-56.167						Spike #3	74.1098	308.037							Spike #3	214.573	160.133
Spike #4	256.475	25.2882							Spike #4	496.587	-71.2691						Spike #4	75.9692	209.829							Spike #4	191.877	237.912
Spike #5	250.276	25.0267							Spike #5	513.469	-99.4239						Spike #5	173.421	155.062							Spike #5	193.6	77.0478
Spike #6	244.908	27.3366							Spike #6	308.025	96.8617						Spike #6	129.01	308.803							Spike #6	95.4884	147.8
Spike #7	230.617	39.9755							Spike #7	264.06	106.243						Spike #7	194.994	381.968							Spike #7	114.067	-35.5269
Spike #8	219.97	52.1344							Spike #8	187.187	-124.791						Spike #8	132.432	217.805							Spike #8	158.306	141.794
Spike #9	-278.575	105.55							Spike #9	100.123	-43.893						Spike #9	311.581	403.374							Spike #9	158.877	134.515
Spike #10	231.881	79.0236							Spike #10	-44.5799	91.1855						Spike #10	471.535	426.554							Spike #10	157.381	114.787
Spike #11	214.973	103.677							Spike #11	-154.089	190.836						Spike #11	181.091	422.959							Spike #11	-98.8239	162.696
Spike #12	234.111	-101.365							Spike #12	-172.745	208.172						Spike #12	298.448	336.555							Spike #12	139.319	97.5446
Spike #13	-223.977	437.471							Spike #13	-190.23	225.759						Spike #13	-77.9757	118.577
Spike #14	241.963	20.5898							Spike #14	-197.799	235.21						Spike #14	120.789	297.099
Spike #15	193.545	85.1513							Spike #15	-203.614	246.952						Spike #15	223.677	194.147
Spike #16	-145.605	247.042							Spike #16	94.0118	59.8315						Spike #16	194.586	210.408
Spike #17	237.83	147.9							Spike #17	87.1314	60.1739						Spike #17	179.499	222.616
Spike #18	186.434	173.316							Spike #18	53.3932	191.991						Spike #18	175.668	231.532
Spike #19	147.478	193.945							Spike #19	158.868	182.854						Spike #19	337.2	253.18
Spike #20	103.301	219.934							Spike #20	155.488	68.9276						Spike #20	74.9059	237.001
Spike #21	70.5361	247.015							Spike #21	146.389	27.8368						Spike #21	-79.799	207.612
Spike #22	65.8732	263.091							Spike #22	145.339	13.5392						Spike #22	348.685	257.581
Spike #23	87.3871	285.256							Spike #23	145.072	9.76216						Spike #23	485.255	409.965
Spike #24	100.802	292.961							Spike #24	137.942	23.9156						Spike #24	441.362	236.341
Spike #25	180.743	286.132							Spike #25	128.803	172.58						Spike #25	259.606	24.6165
Spike #26	-294.945	265.255							Spike #26	47.4091	-155.737						Spike #26	308.154	163.801
Spike #27	-308.256	291.969							Spike #27	-163.029	92.2671						Spike #27	179.635	187.449
Spike #28	-324.415	318.965							Spike #28	136.85	76.2901						Spike #28	-318.221	438.411
Spike #29	-354.543	368.823							Spike #29	130.526	103.204						Spike #29	-299.31	441.997
Spike #30	-379.539	418.908							Spike #30	209.135	-22.2422						Spike #30	-51.8052	352.757
Spike #31	-383.53	443.558							Spike #31	135.341	138.547						Spike #31	238.212	41.409
Spike #32	-205.925	482.835							Spike #32	126.149	145.002						Spike #32	967.636	322.228
Spike #33	316.637	490.61							Spike #33	124.854	146.46						Spike #33	471.785	273.118
Spike #34	345.887	493.093							Spike #34	121.37	153.226						Spike #34	85.6787	206.559
Spike #35	210.176	-45.8946							Spike #35	120.448	160.699						Spike #35	227.299	208.696
Spike #36	257.089	-21.7386							Spike #36	121.016	167.457						Spike #36	424.763	235.825
Spike #37	248.759	53.5125							Spike #37	122.21	173.598						Spike #37	277.903	357.818
Spike #38	-64.1752	-113.433							Spike #38	266.612	-235.045						Spike #38	333.536	66.4778
Spike #39	-22.368	-55.4067							Spike #39	201.609	-235.643						Spike #39	144.279	195.177
Spike #40	17.6302	-1.86772							Spike #40	42.6023	-91.6219						Spike #40	216.834	186.931
Spike #41	32.8324	60.9166							Spike #41	276.619	163.48						Spike #41	128.517	292.452
Spike #42	27.5644	85.9188							Spike #42	260.554	163.247						Spike #42	171.479	442.026
Spike #43	-18.2063	157.93							Spike #43	234.915	162.503						Spike #43	751.868	436.178
Spike #44	-74.7422	-16.7363							Spike #44	87.6638	84.4116						Spike #44	1036.18	399.798
Spike #45	-116.579	-458.671							Spike #45	88.346	89.1664						Spike #45	-8.79296	363.407
Spike #46	164.463	193.713							Spike #46	81.6238	88.476						Spike #46	410.864	138.383
Spike #47	154.72	205.255							Spike #47	138.45	28.6844						Spike #47	262.345	180.69
Spike #48	131.809	232.976							Spike #48	84.3863	72.7858						Spike #48	127.437	115.608
Spike #49	123.477	244.167							Spike #49	-10.5149	164.446						Spike #49	287.784	267.913
Spike #50	122.399	247.481							Spike #50	261.289	221.163						Spike #50	60.2157	405.637
Spike #51	124.491	246.853							Spike #51	-329.257	379.033						Spike #51	218.347	213.682
Spike #52	131.48	243.091							Spike #52	71.4466	244.735						Spike #52	38.6091	271.492
Spike #53	113.13	411.178							Spike #53	260.203	227.615						Spike #53	257.423	273.124
Spike #54	125.127	421.012							Spike #54	271.043	214.436						Spike #54	122.094	128.93
Spike #55	215.039	389.917							Spike #55	618.253	204.645						Spike #55	23.8006	262.605
Spike #56	184.703	201.584							Spike #56	154.778	75.9354						Spike #56	228.82	195.419
Spike #57	174.56	193.797							Spike #57	116.496	132.32						Spike #57	125.607	319.225
Spike #58	173.914	190.012							Spike #58	652.374	1083.03						Spike #58	297.554	363.73
Spike #59	176.109	187.208							Spike #59	788.283	1001.57						Spike #59	368.914	337.018
Spike #60	180.955	184.535							Spike #60	136.357	-7.90638						Spike #60	-14.6594	409.803
Spike #61	183.534	183.147							Spike #61	134.267	-8.31521						Spike #61	110.799	301.939
Spike #62	186.532	181.524							Spike #62	113.839	10.8377						Spike #62	294.787	378.811
Spike #63	198.918	177.022							Spike #63	64.3431	62.2928						Spike #63	315.82	278.948
Spike #64	201.552	178.806							Spike #64	47.3159	79.8276						Spike #64	47.1373	216.451
Spike #65	324.161	298.9							Spike #65	30.8788	97.1964						Spike #65	109.329	223.474
Spike #66	314.517	299.942							Spike #66	136.349	194.939						Spike #66	117.491	215.97
Spike #67	286.651	323.352							Spike #67	125.611	64.0976						Spike #67	-31.0977	205.793
Spike #68	288.729	335.417							Spike #68	55.4583	79.9028						Spike #68	73.3313	187.477
Spike #69	291.867	346.402							Spike #69	221.921	197.325						Spike #69	149.801	197.296
Spike #70	-320.108	434.153							Spike #70	196.676	231.754						Spike #70	224.036	148.751
Spike #71	-290.875	471.047							Spike #71	188.36	250.649						Spike #71	-85.4436	145.67
Spike #72	-272.115	474.57							Spike #72	184.557	264.955						Spike #72	1260.38	655.168
Spike #73	-183.77	479.9							Spike #73	-40.07	145.716						Spike #73	193.425	148.574
Spike #74	297.234	286.347							Spike #74	171.108	257.7						Spike #74	238.023	280.571
Spike #75	208.444	301.514							Spike #75	72.6096	-51.2891						Spike #75	266.162	168.76
Spike #76	216.932	300.512							Spike #76	217.378	-216.482						Spike #76	261.084	167.371
Spike #77	247.376	113.882							Spike #77	192.398	-240.97						Spike #77	206.623	176.358
Spike #78	241.658	119.311							Spike #78	320.21	-242.838						Spike #78	70.7977	113.672
Spike #79	229.25	131.715							Spike #79	319.393	-246.533						Spike #79	184.718	249.093
Spike #80	222.8	138.272							Spike #80	320.642	-242.029						Spike #80	78.8269	198.886
Spike #81	182.039	177.721							Spike #81	330.765	-226.474						Spike #81	127.408	201.781
Spike #82	157.943	196.081							Spike #82	339.603	-207.328						Spike #82	67.8342	207.257
Spike #83	132.574	205.999							Spike #83	184.94	251.228						Spike #83	193.313	256.564
Spike #84	105.017	188.244							Spike #84	-194.069	355.377						Spike #84	331.121	279.685
Spike #85	102.605	181.341							Spike #85	213.533	19.2878						Spike #85	338.947	270.342
Spike #86	101.538	169.393							Spike #86	178.171	123.586						Spike #86	30.8133	373.479
Spike #87	106.48	153.199							Spike #87	159.202	151.553						Spike #87	622.121	238.563
Spike #88	236.089	-53.5533							Spike #88	130.163	203.778						Spike #88	1028.81	555.147
Spike #89	240.498	-74.312							Spike #89	278.832	-138.058						Spike #89	271.719	218.293
Spike #90	235.248	625.794							Spike #90	248.095	-123.866						Spike #90	344.428	446.394
Spike #91	415.86	339.154							Spike #91	81.0962	-95.9847						Spike #91	179.363	450.44
Spike #92	386.514	-137.795							Spike #92	218.747	-393.193						Spike #92	173.704	26.8302
Spike #93	350.416	250.664							Spike #93	-322.36	294.161						Spike #93	144.01	35.5569
Spike #94	346.24	259.536							Spike #94	181.051	257.48						Spike #94	113.447	42.5124
Spike #95	336.381	277.458							Spike #95	176.471	258.068						Spike #95	-65.1377	221.403
Spike #96	315.294	308.246							Spike #96	48.166	-112.236						Spike #96	306.67	232.496
Spike #97	288.162	334.623							Spike #97	29.6287	-99.426						Spike #97	301.009	257.407
Spike #98	274.612	340.068							Spike #98	126.029	62.2479						Spike #98	184.509	250.707
Spike #99	247.2	311.123							Spike #99	314.317	78.3356						Spike #99	238.798	355.933
Spike #100	236.821	242.109							Spike #100	74.5147	-55.3647						Spike #100	132.296	271.483
Spike #101	473.123	351.195							Spike #101	257.52	-120.424						Spike #101	-7.22409	105.419
Spike #102	433.339	351.996							Spike #102	284.677	-117.766						Spike #102	174.415	229.968
Spike #103	-40.4185	64.2621							Spike #103	491.007	391.671						Spike #103	143.3	82.8038
Spike #104	289.059	236.654							Spike #104	369.728	140.93						Spike #104	-70.2551	157.056
Spike #105	267.514	246.39							Spike #105	338.157	139.716						Spike #105	41.9215	195.664
Spike #106	299.346	157.941							Spike #106	264.67	198.255						Spike #106	505.294	452.278
Spike #107	271.874	145.329							Spike #107	251.441	134.273						Spike #107	61.442	129.138
Spike #108	261.773	142.543							Spike #108	64.3463	39.8718						Spike #108	178.305	128.377
Spike #109	223.667	134.631							Spike #109	225.918	-154.772						Spike #109	340.367	357.093
Spike #110	198.55	144.65							Spike #110	126.185	-150.906						Spike #110	195.559	-54.2123
Spike #111	177.518	188.759							Spike #111	-0.446459	-12.0887						Spike #111	185.997	-32.3816
Spike #112	338.351	19.9204							Spike #112	-136.496	-18.8812						Spike #112	93.141	213.963
Spike #113	278.119	72.7028							Spike #113	-73.3089	-6.41478						Spike #113	109.397	427.127
Spike #114	129.947	206.245							Spike #114	24.8871	122.211						Spike #114	204.375	171.495
Spike #115	100.225	232.563							Spike #115	376.564	92.5434						Spike #115	126.335	150.356
Spike #116	46.5875	279.295							Spike #116	379.504	-250.522						Spike #116	117.932	219.404
Spike #117	6.14954	315.041							Spike #117	-222.508	232.97						Spike #117	129.258	243.921
Spike #118	247.329	336.428							Spike #118	45.1535	158.324						Spike #118	137.976	262.384
Spike #119	304.205	264.306							Spike #119	-63.7193	288.966						Spike #119	152.799	298.399
Spike #120	340.141	194.488							Spike #120	251.02	21.3614						Spike #120	455.045	-467.456
Spike #121	134.996	217.978							Spike #121	266.187	78.9323						Spike #121	344.654	-371.157
Spike #122	123.879	223.772							Spike #122	107.446	56.185						Spike #122	195.384	201.836
Spike #123	115.35	228.193							Spike #123	333.065	13.5401						Spike #123	-136.673	223.694
Spike #124	99.785	237.313							Spike #124	185.961	49.1099						Spike #124	-136.167	228.632
Spike #125	96.7558	239.765							Spike #125	1112.58	597.964						Spike #125	23.4894	208.388
Spike #126	92.5187	245.834							Spike #126	130.284	-27.2545						Spike #126	17.1264	217.103
Spike #127	92.2686	249.651							Spike #127	107.219	8.8236						Spike #127	10.9387	225.576
Spike #128	95.7184	256.517							Spike #128	-131.726	194.922						Spike #128	177.848	318.055
Spike #129	117.179	272.44							Spike #129	-108.599	183.103						Spike #129	179.142	320.49
Spike #130	128.232	278.198							Spike #130	169.394	225.462						Spike #130	-190.861	326.599
Spike #131	157.886	291.563							Spike #131	-185.76	186.173						Spike #131	211.655	457.103
Spike #132	252.922	264.551							Spike #132	-226.742	246.045						Spike #132	193.502	419.746
Spike #133	204.805	314.828							Spike #133	-211.55	405.359						Spike #133	101.394	89.6108
Spike #134	-287.905	352.042							Spike #134	254.1	97.0536						Spike #134	89.5399	7.07758
Spike #135	-286.677	372.881							Spike #135	112.398	57.7685						Spike #135	90.6711	257.49
Spike #136	-252.322	399.326							Spike #136	185.872	142.243						Spike #136	90.4256	119.972
Spike #137	-190.656	408.017							Spike #137	174.113	66.9654						Spike #137	143.258	191.937
Spike #138	5.66633	398.574							Spike #138	244.519	162.95						Spike #138	289.2	-125.028
Spike #139	244.891	369.105							Spike #139	204.336	143.874						Spike #139	-339.714	345.952
Spike #140	178.569	72.3713							Spike #140	187.271	129.5						Spike #140	249.475	214.682
Spike #141	148.82	78.5084							Spike #141	168.129	40.6567						Spike #141	162.394	233.188
Spike #142	130.278	83.5777							Spike #142	153.151	45.7991						Spike #142	211.189	303.806
Spike #143	112.527	89.4267							Spike #143	112.75	73.8843						Spike #143	100.169	281.818
Spike #144	95.21	96.247							Spike #144	74.8556	121.341						Spike #144	129.674	-32.9341
Spike #145	87.2261	100.042							Spike #145	58.1515	151.451						Spike #145	224.43	112.404
Spike #146	351.678	211.13							Spike #146	40.2739	201.379						Spike #146	-228.189	239.192
Spike #147	233.2	300.231							Spike #147	38.0612	225.552						Spike #147	287.981	371.704
Spike #148	299.101	280.144							Spike #148	38.8861	81.127						Spike #148	168.461	95.301
Spike #149	304.65	268.413							Spike #149	28.442	118.634						Spike #149	108	292.287
Spike #150	306.218	255.33							Spike #150	220.696	273.797						Spike #150	-79.1191	314.445
Spike #151	251.246	231.791							Spike #151	219.579	275.944						Spike #151	105.426	222.346
Spike #152	245.32	246.772							Spike #152	246.42	337.699						Spike #152	241.278	193.071
Spike #153	235.484	283.973							Spike #153	247.571	341.511						Spike #153	347.08	224.965
Spike #154	342.294	272.03							Spike #154	121.752	104.027						Spike #154	170.996	194.627
Spike #155	352.552	234.653							Spike #155	185.403	331.501						Spike #155	226.463	147.584
Spike #156	365.348	204.921							Spike #156	353.79	-108.934						Spike #156	6.08774	165.434
Spike #157	381.365	180.565							Spike #157	130.525	184.618						Spike #157	319.937	234.365
Spike #158	407.896	160.28							Spike #158	89.5488	163.263						Spike #158	225.321	131.976
Spike #159	403.557	164.827							Spike #159	143.745	-11.6722						Spike #159	365.695	431.124
Spike #160	352.447	195.971							Spike #160	136.089	-10.1509						Spike #160	365.447	431.954
Spike #161	48.2119	224.958							Spike #161	109.251	17.6431						Spike #161	343.125	551.036
Spike #162	66.8967	218.838							Spike #162	96.4049	35.0462						Spike #162	-44.729	361.825
Spike #163	108.081	202.184							Spike #163	29.3852	137.54						Spike #163	285.631	203.617
Spike #164	138.405	189.618							Spike #164	7.19514	179.326						Spike #164	-404.005	283.146
Spike #165	162.636	181.295							Spike #165	170.657	-14.1219						Spike #165	-332.227	449.12
Spike #166	186.367	175.628							Spike #166	148.002	3.48356						Spike #166	273.111	340.259
Spike #167	200.599	174.008							Spike #167	118.12	34.743						Spike #167	-142.399	233.042
Spike #168	221.545	178.159							Spike #168	-120.995	317.5						Spike #168	278.83	180.034
Spike #169	227.549	185.999							Spike #169	103.029	70.8923						Spike #169	116.991	221.338
Spike #170	228.689	199.84							Spike #170	41.9549	125.977						Spike #170	313.196	266.402
Spike #171	259.063	-16.6657							Spike #171	-38.1115	197.742						Spike #171	-140.784	710.696
Spike #172	99.3466	133.832							Spike #172	446.783	1351.79						Spike #172	285.664	399.773
Spike #173	165.595	228.947							Spike #173	166.39	-151.428						Spike #173	99.2227	190.565
Spike #174	221.159	-27.6835							Spike #174	270.419	152.75						Spike #174	181.968	283.272
Spike #175	385.938	-121.609							Spike #175	365.736	-209.295						Spike #175	327.456	238.87
Spike #176	302.837	-100.691							Spike #176	239.097	127.509						Spike #176	127.077	228.659
Spike #177	162.628	224.31							Spike #177	22.5822	221.299						Spike #177	200.84	250.132
Spike #178	155.303	247.868							Spike #178	288.302	-104.364						Spike #178	88.1607	220.146
Spike #179	143.26	288.969							Spike #179	145.135	101.537						Spike #179	254.176	259.396
Spike #180	151.781	363.099							Spike #180	117.781	111.976						Spike #180	126.368	123.145
Spike #181	165.271	369.903							Spike #181	108.536	119.854						Spike #181	288.239	224.495
Spike #182	282.196	109.194							Spike #182	98.513	144.32						Spike #182	309.751	360.927
Spike #183	258.639	112.699							Spike #183	97.1327	156.918						Spike #183	144.244	214.189
Spike #184	236.602	124.011							Spike #184	325.96	-146.518						Spike #184	-0.370891	326.12
Spike #185	320.856	22.2532							Spike #185	-52.8744	-43.1175						Spike #185	123.307	223.898
Spike #186	334.093	27.5572							Spike #186	-120.935	21.9387						Spike #186	-52.113	496.142
Spike #187	281.354	103.338							Spike #187	-171.084	109.906						Spike #187	85.0238	397.837
Spike #188	204.605	187.157							Spike #188	-241.715	217.398						Spike #188	-12.3328	60.6192
Spike #189	-63.1038	243.369							Spike #189	-290.127	246.18						Spike #189	-26.4739	101.177
Spike #190	-92.5617	297.344							Spike #190	-70.1772	-10.5413						Spike #190	-16.5664	168.906
Spike #191	203.583	113.955							Spike #191	-247.571	201.507						Spike #191	312.585	160.356
Spike #192	159.48	139.291							Spike #192	363.256	-344.928						Spike #192	276.552	169.433
Spike #193	139.27	156.244							Spike #193	325.94	-303.711						Spike #193	106.593	129.038
Spike #194	128.211	167.578							Spike #194	146.215	-93.7725						Spike #194	111.888	166.536
Spike #195	117.284	180.695							Spike #195	-375.168	383.979						Spike #195	111.848	194.292
Spike #196	110.495	190.106							Spike #196	277.875	-336.837						Spike #196	112.773	263.241
Spike #197	102.137	203.679							Spike #197	275.642	-312.788						Spike #197	94.8281	310.937
Spike #198	96.6552	214.812							Spike #198	38.6165	-26.0773						Spike #198	245.049	177.867
Spike #199	94.6114	221.473							Spike #199	324.066	-496.721						Spike #199	278.872	233.888
Spike #200	94.8619	222.915															Spike #200	271.101	275.256
Spike #201	99.2409	219.743															Spike #201	179.366	217.738
Spike #202	291.598	1315.48															Spike #202	306.214	349.063
Spike #203	514.04	247.409															Spike #203	345.032	258.956
Spike #204	488.79	205.738															Spike #204	68.7665	179.08
Spike #205	476.324	192.104															Spike #205	435.149	321.585
Spike #206	447.82	168.414															Spike #206	-11.1881	136.618
Spike #207	415.515	149.013															Spike #207	69.3606	248.218
Spike #208	393.808	139.666															Spike #208	172.366	278.347
Spike #209	380.621	135.573															Spike #209	52.7704	267.624
Spike #210	359.986	131.728															Spike #210	292.202	316.97
Spike #211	337.895	131.406															Spike #211	-132.532	177.594
Spike #212	307.092	137.924															Spike #212	140.01	251.866
Spike #213	-152.196	156.149															Spike #213	198.362	342.116
Spike #214	-169.376	183.198															Spike #214	423.207	408.885
Spike #215	-126.178	294.379															Spike #215	234.099	137.404
Spike #216	-19.4338	377.18															Spike #216	145.718	335.66
Spike #217	2.82774	397.932															Spike #217	112.882	191.457
Spike #218	90.2316	560.738															Spike #218	176.678	290.587
Spike #219	176.325	17.7438															Spike #219	1162.5	604.027
Spike #220	151.681	45.3846															Spike #220	121.634	147.461
Spike #221	124.541	87.3713															Spike #221	124.001	145.368
Spike #222	114.291	104.589															Spike #222	372.787	261.443
Spike #223	49.6531	223.431															Spike #223	339.603	264.056
Spike #224	18.8885	296.658															Spike #224	201.345	86.8883
Spike #225	151.322	289.711															Spike #225	178.174	189.304
Spike #226	344.571	433.075															Spike #226	210.644	176.277
Spike #227	236.558	145.886															Spike #227	219.937	207.327
Spike #228	196.769	112.555															Spike #228	104.254	44.7215
Spike #229	165.159	110.163															Spike #229	230.63	123.751
Spike #230	318.209	213.28															Spike #230	140.126	221.384
Spike #231	213.07	234.215															Spike #231	82.7243	245.073
Spike #232	203.757	229.793															Spike #232	82.2067	246.11
Spike #233	208.922	233.371															Spike #233	41.9867	446.231
Spike #234	215.088	241.47															Spike #234	684.392	234.452
Spike #235	126.88	62.799															Spike #235	130.989	138.888
Spike #236	95.6792	99.2519															Spike #236	161.697	104.2
Spike #237	41.8508	162.785															Spike #237	61.3492	233.124
Spike #238	-12.2472	228.82															Spike #238	179.2	245.312
Spike #239	-42.5894	268.208															Spike #239	149.632	222.039
Spike #240	-66.3116	302.249															Spike #240	46.2928	269.362
Spike #241	-78.196	324.25															Spike #241	176.34	196.541
Spike #242	-75.8438	332.583															Spike #242	84.7235	239.37
Spike #243	-57.845	323.256															Spike #243	164.722	155.736
Spike #244	-12.3322	288.987															Spike #244	181.613	294.646
Spike #245	8.53248	273.268															Spike #245	180.088	296.323
Spike #246	132.561	127.42															Spike #246	314.278	250.749
Spike #247	308.307	217.252															Spike #247	297.282	106.594
Spike #248	323.447	185.379															Spike #248	298.565	328.28
Spike #249	301.906	184.333															Spike #249	266.065	366.391
Spike #250	277.819	197.963															Spike #250	-7.30871	309.832
Spike #251	1207.04	243.264															Spike #251	193.657	237.233
Spike #252	402.297	183.136															Spike #252	189.4	261.108
Spike #253	270.069	196.103															Spike #253	192.134	279.009
Spike #254	280.13	172.144															Spike #254	5.51656	281.216
Spike #255	283.898	157.097															Spike #255	179.722	122.888
Spike #256	283.169	151.784															Spike #256	180.437	123.329
Spike #257	255.98	174.393															Spike #257	271.984	259.436
Spike #258	237.668	192.202															Spike #258	214.359	349.704
Spike #259	216.816	209.017															Spike #259	213.249	379.927
Spike #260	235.385	161.793															Spike #260	332.589	200.337
Spike #261	205.363	125.418															Spike #261	317.368	138.438
Spike #262	184.165	42.2837															Spike #262	500.107	163.094
Spike #263	158.772	-191.449															Spike #263	179.524	310.536
Spike #264	129.065	336.432															Spike #264	333.893	385.855
Spike #265	172.554	384.731															Spike #265	28.2363	16.9921
Spike #266	-289.057	178.809															Spike #266	29.5344	109.697
Spike #267	337.229	323.692															Spike #267	831.115	181.381
Spike #268	329.852	339.869															Spike #268	194.463	-15.9426
Spike #269	298.615	414.278															Spike #269	42.6931	98.1174
Spike #270	159.611	208.958															Spike #270	329.54	54.1923
Spike #271	252.153	210.228															Spike #271	117.528	147.827
Spike #272	172.716	332.875															Spike #272	50.1184	302.573
Spike #273	112.634	433.931															Spike #273	53.8223	33.7595
Spike #274	80.5576	511.652															Spike #274	223.135	71.1514
Spike #275	77.2425	551.374															Spike #275	296.405	60.1127
Spike #276	84.1981	567.531															Spike #276	408.177	73.0657
Spike #277	299.811	191.326															Spike #277	97.3968	340.786
Spike #278	260.557	226.497															Spike #278	42.9649	18.8538
Spike #279	245.062	241.066															Spike #279	-45.7985	114.561
Spike #280	189.694	295.506															Spike #280	-103.06	218.844
Spike #281	182.278	302.913															Spike #281	535.655	193.452
Spike #282	171.608	313.458															Spike #282	322.07	249.022
Spike #283	160.538	323.609															Spike #283	-33.1302	341.302
Spike #284	325.763	89.2793															Spike #284	252.278	203.61
Spike #285	306.421	111.146															Spike #285	169.815	184.437
Spike #286	284.23	138.601															Spike #286	-311.845	182.154
Spike #287	219.589	219.855															Spike #287	237.623	121.319
Spike #288	407.047	465.715															Spike #288	-410.426	354.673
Spike #289	455.795	485.88															Spike #289	112.021	190.446
Spike #290	411.012	428.296															Spike #290	-129.604	519.108
Spike #291	434.446	172.11															Spike #291	1897.54	624.364
Spike #292	382.392	189.716															Spike #292	1488.73	569.886
Spike #293	351.544	213.526															Spike #293	91.1144	231.379
Spike #294	286.669	274.783															Spike #294	23.8711	89.3738
Spike #295	246.038	316.258															Spike #295	-154.103	225.214
Spike #296	74.5383	284.357															Spike #296	276.976	258.2
Spike #297	108.495	276.816															Spike #297	355.937	286.755
Spike #298	215.289	5.1313															Spike #298	335.06	329.221
Spike #299	198.851	1.8938															Spike #299	18.3483	-249.535
Spike #300	134.144	77.6808															Spike #300	278.828	333.565
Spike #301	66.0439	153.09															Spike #301	310.188	-7.96421
Spike #302	444.145	360.22															Spike #302	-288.217	307.827
Spike #303	147.295	478.558															Spike #303	448.408	37.0107
Spike #304	165.027	480.226															Spike #304	341.678	256.386
Spike #305	36.8066	86.1263															Spike #305	468.849	171.967
Spike #306	82.5005	70.553															Spike #306	184.848	-100.64
Spike #307	100.831	74.5306															Spike #307	492.913	-381.032
Spike #308	129.222	93.4335															Spike #308	28.1427	451.765
Spike #309	139.99	123.599															Spike #309	-205.134	151.354
Spike #310	104.018	327.231															Spike #310	375.932	108.862
Spike #311	71.5185	367.505															Spike #311	44.3463	401.752
Spike #312	65.0944	374.917															Spike #312	109.657	271.014
Spike #313	59.0757	380.711															Spike #313	133.632	306.933
Spike #314	78.6068	353.241															Spike #314	263.339	364.441
Spike #315	93.2533	335.537															Spike #315	107.538	208.108
Spike #316	175.345	257.974															Spike #316	47.3376	115.915
Spike #317	277.671	210.748															Spike #317	15.2734	346.438
Spike #318	41.8876	217.611															Spike #318	365.666	-88.2001
Spike #319	250.219	236.258															Spike #319	397.033	34.1462
Spike #320	434.166	226.491															Spike #320	306.256	-134.087
Spike #321	273.611	239.314															Spike #321	229.148	165.41
Spike #322	-8.44726	84.8503															Spike #322	-149.573	265.637
Spike #323	-35.8719	288.467															Spike #323	484.578	557.075
Spike #324	202.34	39.4971															Spike #324	285.331	196.725
Spike #325	244.49	-45.5385															Spike #325	156.855	-67.1264
Spike #326	250.246	-47.3701															Spike #326	263.013	-23.5376
Spike #327	231.428	-25.1096															Spike #327	439.974	258.025
Spike #328	218.857	-11.0985															Spike #328	146.098	181.357
Spike #329	163.714	47.9346															Spike #329	-44.0484	-84.6107
Spike #330	457.664	344.833															Spike #330	168.094	149.075
Spike #331	143.332	88.6654															Spike #331	50.4924	275.002
Spike #332	156.421	86.3908															Spike #332	183.047	134.661
Spike #333	154.663	95.6817															Spike #333	222.225	401.305
Spike #334	147.978	112.853															Spike #334	319.096	397.954
Spike #335	123.295	173.663															Spike #335	152.316	110.448
Spike #336	115.091	198.476															Spike #336	532.441	360.743
Spike #337	109.272	218.327															Spike #337	428.576	218.129
Spike #338	102.281	242.922															Spike #338	412.189	59.9937
Spike #339	-194.879	182.694															Spike #339	260.89	-63.9878
Spike #340	269.927	291.381															Spike #340	59.4985	192.625
Spike #341	356.608	297.009															Spike #341	242.372	192.909
Spike #342	347.98	303.753															Spike #342	334.166	187.273
Spike #343	204.636	189.69															Spike #343	229.173	17.5474
Spike #344	208.635	207.45															Spike #344	114.628	394.683
Spike #345	199.782	325.104															Spike #345	332.069	227.243
Spike #346	179.283	398.829															Spike #346	347.788	33.7075
Spike #347	177.359	417.127															Spike #347	328.881	383.218
Spike #348	-183.341	331.703															Spike #348	217.341	351.243
Spike #349	236.688	-219.399															Spike #349	315.533	404.188
Spike #350	181.912	294.847															Spike #350	83.1293	235.164
Spike #351	208.83	238.118															Spike #351	101.899	41.4922
Spike #352	238.016	41.6794															Spike #352	363.158	148.979
Spike #353	219.143	157.835															Spike #353	120.355	291.768
Spike #354	197.999	171.579															Spike #354	189.643	416.219
Spike #355	160.037	190.634															Spike #355	935.06	1098.07
Spike #356	124.866	205.253															Spike #356	248.963	302.778
Spike #357	114.466	207.815															Spike #357	73.5162	290.92
Spike #358	469.636	367.639															Spike #358	255.948	190.341
Spike #359	167.371	198.838															Spike #359	169.67	480.41
Spike #360	126.601	246.337															Spike #360	200.61	242.428
Spike #361	108.016	268.706															Spike #361	213.973	373.968
Spike #362	96.6513	287.094															Spike #362	358.171	192.818
Spike #363	105.643	286.973															Spike #363	286.952	305.827
Spike #364	260.966	39.4196															Spike #364	467.454	-150.185
Spike #365	336.656	206.84															Spike #365	1148.36	663.47
Spike #366	337.453	201.111															Spike #366	444.779	79.905
Spike #367	325.128	194.225															Spike #367	456.096	161.169
Spike #368	318.746	195.813															Spike #368	247.313	264.864
Spike #369	312.029	198.515															Spike #369	563.639	1522.27
Spike #370	291.197	210.757															Spike #370	601.644	1522.9
Spike #371	257.283	237.057															Spike #371	263.766	286.922
Spike #372	234.744	255.583															Spike #372	488.321	506.369
Spike #373	318.154	-367.732															Spike #373	481.739	495.683
Spike #374	230.865	-261.983															Spike #374	570.019	211.043
Spike #375	33.2833	-23.2206															Spike #375	304.181	355.744
Spike #376	93.682	383.563															Spike #376	331.831	386.799
Spike #377	206.17	239.376															Spike #377	-137.855	123.386
Spike #378	199.359	259.369															Spike #378	-136.227	111.578
Spike #379	169.865	155.119															Spike #379	77.721	174.548
Spike #380	99.8259	248.398															Spike #380	156.758	218.556
Spike #381	40.1675	336.906															Spike #381	135.18	121.296
Spike #382	3.15019	406.373															Spike #382	273.976	331.852
Spike #383	0.503529	480.669															Spike #383	1133.42	492.231
Spike #384	223.207	194.605															Spike #384	597.375	149.813
Spike #385	484.506	329.412															Spike #385	376.577	240.377
Spike #386	442.027	414.142															Spike #386	307.937	174.523
Spike #387	408.952	374.475															Spike #387	563.618	254.512
Spike #388	403.2	304.917															Spike #388	510.155	492.118
Spike #389	409.241	240.278															Spike #389	-265.335	397.829
Spike #390	284.346	308.406															Spike #390	396.302	309.85
Spike #391	228.706	375.229															Spike #391	-6.62526	262.489
Spike #392	688.83	371.915															Spike #392	245.708	243.065
Spike #393	328.737	207.621															Spike #393	318.901	232.088
Spike #394	306.05	220.324															Spike #394	190.007	345.843
Spike #395	277.16	242.596															Spike #395	76.0626	153.745
Spike #396	252.987	262.714															Spike #396	207.143	202.049
Spike #397	239.842	272.841															Spike #397	424.631	334.959
Spike #398	219.81	286.293															Spike #398	380.822	205.086
Spike #399	206.432	294.055															Spike #399	278.977	132.994
Spike #400	203.596	296.878															Spike #400	63.2824	0.630103
Spike #401	208.574	360.679															Spike #401	-174.661	520.386
Spike #402	212.719	356.468															Spike #402	119.283	301.451
Spike #403	217.098	349.146															Spike #403	319.432	96.3662
Spike #404	230.894	319.322															Spike #404	364.688	377.974
Spike #405	283.392	188.41															Spike #405	176.709	358.039
Spike #406	328.279	124.686															Spike #406	107.622	483.962
Spike #407	356.865	118.584															Spike #407	333.648	483.104
Spike #408	-22.662	219.926															Spike #408	31.9621	118.67
Spike #409	-63.993	260.896															Spike #409	509.902	306.461
Spike #410	-76.3427	280.176															Spike #410	-55.5287	304.409
Spike #411	311.225	258.87															Spike #411	484.292	323.315
Spike #412	248.882	337.183															Spike #412	408.901	357.646
Spike #413	240.455	353.724															Spike #413	244.207	220.279
Spike #414	238.782	362.382															Spike #414	157.196	10.7763
Spike #415	90.6705	-128.444															Spike #415	250.272	188.178
Spike #416	-195.456	226.617															Spike #416	309.469	228.05
Spike #417	-188.19	237.741															Spike #417	159.56	124.623
Spike #418	288.42	143.486															Spike #418	165.705	182.271
Spike #419	252.063	164.541															Spike #419	186.772	131.227
Spike #420	201.571	200.686															Spike #420	121.078	102.207
Spike #421	171.51	223.993															Spike #421	337.867	192.456
Spike #422	137.627	247.738															Spike #422	32.106	191.115
Spike #423	127.31	242.53															Spike #423	139.111	289.433
Spike #424	130.782	227.843															Spike #424	241.18	196.657
Spike #425	364.782	240.956															Spike #425	243.197	196.845
Spike #426	366.213	412.939															Spike #426	45.2631	108.638
Spike #427	364.137	126.028															Spike #427	30.7705	230.221
Spike #428	272.49	315.155															Spike #428	40.265	154.948
Spike #429	302.655	319.81															Spike #429	179.13	87.6271
Spike #430	313.709	322.74															Spike #430	132.466	170.561
Spike #431	302.607	124.868															Spike #431	334.045	43.9394
Spike #432	296.938	123.288															Spike #432	159.521	311.063
Spike #433	291.892	126.08															Spike #433	201.274	114.485
Spike #434	279.84	137.708															Spike #434	162.687	85.2697
Spike #435	271.648	147.473															Spike #435	159.934	87.9314
Spike #436	261.362	160.857															Spike #436	45.4949	55.0801
Spike #437	251.638	174.2															Spike #437	190.743	241.602
Spike #438	236.265	196.245															Spike #438	-31.7951	114.293
Spike #439	221.671	218.121															Spike #439	-129.912	241.723
Spike #440	211.412	234.075															Spike #440	143.081	170.712
Spike #441	195.605	259.725															Spike #441	124.352	74.438
Spike #442	175.968	293.93															Spike #442	255.839	217.426
Spike #443	157.715	329.279															Spike #443	256.437	27.4866
Spike #444	152.194	341.123															Spike #444	149.32	143.109
Spike #445	875.509	1040.56															Spike #445	93.843	328.837
Spike #446	1236.21	636.895															Spike #446	134.503	320.895
Spike #447	1241.41	556.071															Spike #447	173.187	75.3896
Spike #448	1189.64	537.49															Spike #448	200.807	152.683
Spike #449	1096.55	540.832															Spike #449	941.159	947.645
Spike #450	158.318	-81.8674															Spike #450	69.9167	199.592
Spike #451	65.578	43.5026															Spike #451	32.504	291.654
Spike #452	-40.6295	175.985															Spike #452	248.872	172.871
Spike #453	-96.3104	237.491															Spike #453	67.9383	252.395
Spike #454	-114.007	250.124															Spike #454	103.996	188.858
Spike #455	-115.35	232.334															Spike #455	153.028	82.2476
Spike #456	433.911	160.062															Spike #456	177.762	-28.2954
Spike #457	348.487	143.653															Spike #457	13.6669	266.699
Spike #458	359.148	454.132															Spike #458	224.895	111.781
Spike #459	465.567	286.921															Spike #459	172.143	160.071
Spike #460	436.058	297.347															Spike #460	104.428	292.689
Spike #461	49.546	-79.3808															Spike #461	112.758	81.145
Spike #462	-6.34919	-11.3524															Spike #462	187.283	219.622
Spike #463	-100.145	10.3927															Spike #463	2.58897	27.7994
Spike #464	979.39	863.004															Spike #464	317.427	113.308
Spike #465	1135.53	662.118															Spike #465	372.287	-140.253
Spike #466	1225.05	553.265															Spike #466	127.922	194.679
Spike #467	1263.4	499.305															Spike #467	-165.425	275.636
Spike #468	1266.3	483.408															Spike #468	119.309	57.516
Spike #469	1222.4	463.499															Spike #469	331.2	108.162
Spike #470	-263.93	210.109															Spike #470	186.272	3.79102
Spike #471	147.397	407.566															Spike #471	91.611	99.5651
Spike #472	290.837	410.284															Spike #472	118.569	241.056
Spike #473	326.105	412.442															Spike #473	162.56	276.944
Spike #474	355.637	410.199															Spike #474	-39.6649	141.936
Spike #475	351.076	235.415															Spike #475	254.232	61.8977
Spike #476	338.581	215.492															Spike #476	122.467	143.586
Spike #477	320.328	179.027															Spike #477	132.104	169.247
Spike #478	314.149	164.934															Spike #478	380.757	0.681235
Spike #479	309.109	153.792															Spike #479	130.232	143.198
Spike #480	302.509	143.16															Spike #480	167.154	124.429
Spike #481	298.793	141.708															Spike #481	83.8368	252.665
Spike #482	289.322	153.887															Spike #482	136.322	158.328
Spike #483	284.535	164.495															Spike #483	178.237	-31.1594
Spike #484	216.261	299.636															Spike #484	4.76779	117.901
Spike #485	207.859	308.085															Spike #485	205.37	174.497
Spike #486	203.965	310.33															Spike #486	409.281	-200.031
Spike #487	198.756	304.397															Spike #487	187.029	281.42
Spike #488	205.779	283.57															Spike #488	18.5199	140.215
Spike #489	209.949	275.517															Spike #489	211.794	39.294
Spike #490	240.865	237.675															Spike #490	250.573	132.758
Spike #491	1399.05	1008.8															Spike #491	142.961	189.756
Spike #492	1509.95	937.685															Spike #492	63.0842	112.827
Spike #493	1536.17	910.048															Spike #493	154.914	109.663
Spike #494	97.9893	256.851															Spike #494	184.991	271.272
Spike #495	107.358	261.15															Spike #495	221.709	-93.4465
Spike #496	151.806	275.171															Spike #496	242.069	68.1967
Spike #497	172.697	283.084															Spike #497	162.178	57.6878
Spike #498	194.846	292.247															Spike #498	223.326	188.853
Spike #499	228.521	308.693															Spike #499	154.651	-18.835
Spike #500	235.94	313.075															Spike #500	163.999	45.9282
Spike #501	246.265	319.967															Spike #501	58.6835	183.619
Spike #502	131.561	5.03457															Spike #502	163.768	204.607
Spike #503	122.55	-15.8841															Spike #503	299.831	148.523
Spike #504	117.019	-25.7987															Spike #504	173.578	122.318
Spike #505	97.6076	-44.471															Spike #505	138.146	124.302
Spike #506	88.0676	-37.8024															Spike #506	217.92	218.447
Spike #507	77.9752	-18.8952															Spike #507	128.097	224.196
Spike #508	69.9302	0.530576															Spike #508	176.912	262.501
Spike #509	63.4786	17.2367															Spike #509	141.04	158.64
Spike #510	354.241	484.358															Spike #510	123.799	240.081
Spike #511	392.93	460.382															Spike #511	111.969	239.88
Spike #512	408.954	439.648															Spike #512	222.901	-9.90519
Spike #513	426.675	399.629															Spike #513	90.7247	123.381
Spike #514	456.092	203.31															Spike #514	203.722	126.949
Spike #515	484.297	-119.662															Spike #515	63.4248	364.682
Spike #516	488.739	-130.625															Spike #516	45.1574	188.165
Spike #517	539.974	336.977															Spike #517	142.808	26.4854
Spike #518	446.701	35.1986															Spike #518	39.9786	174.147
Spike #519	367.132	77.8276															Spike #519	122.875	189.642
Spike #520	295.999	94.6146															Spike #520	69.8723	158.947
Spike #521	100.524	208.111															Spike #521	203.543	190.89
Spike #522	-122.952	300.969															Spike #522	214.795	124.913
Spike #523	-117.818	353.986															Spike #523	185.186	270.969
Spike #524	-67.9753	390.51															Spike #524	119.769	106.489
Spike #525	107.715	440.157															Spike #525	102.553	103.832
Spike #526	172.805	455.741															Spike #526	104.907	65.669
Spike #527	209.046	465.089															Spike #527	187.875	-58.6536
Spike #528	292.676	220.527															Spike #528	259.924	231.454
Spike #529	308.799	173.972															Spike #529	5.59656	147.261
Spike #530	312.99	169.442															Spike #530	-65.3369	235.575
Spike #531	271.438	252.418															Spike #531	47.1306	149.604
Spike #532	226.55	409.461															Spike #532	64.6324	188.931
Spike #533	250.979	421.247															Spike #533	154.441	155.003
Spike #534	165.853	251.282															Spike #534	192.218	66.0735
Spike #535	461.114	350.781															Spike #535	270.027	13.5631
Spike #536	444.665	351.267															Spike #536	501.387	253.586
Spike #537	430.924	351.981															Spike #537	209.33	225.733
Spike #538	407.848	352.872															Spike #538	-82.0072	136.212
Spike #539	397.407	352.74															Spike #539	140.745	82.3458
Spike #540	7.50651	308.369															Spike #540	-12.9773	207.559
Spike #541	-4.86918	347.689															Spike #541	-117.656	-309.672
Spike #542	7.37356	379.84															Spike #542	152.375	107.82
Spike #543	22.643	392.379															Spike #543	186.75	92.2768
Spike #544	60.0819	408.634															Spike #544	97.963	71.3732
Spike #545	114.163	420.666															Spike #545	384.559	3.75684
Spike #546	217.995	430.567															Spike #546	136.195	-8.27238
Spike #547	-80.5486	219.341															Spike #547	135.223	-20.3224
Spike #548	-66.53	237.612															Spike #548	195.398	355.09
Spike #549	131.366	253.887															Spike #549	125.437	32.9716
Spike #550	161.471	259.47															Spike #550	70.5436	97.315
Spike #551	172.496	369.844															Spike #551	128.581	152.912
Spike #552	179.164	388.879															Spike #552	35.5465	-54.8218
Spike #553	374.408	170.425															Spike #553	222.615	16.1147
Spike #554	279.123	245.667															Spike #554	92.0679	140.226
Spike #555	180.176	304.93															Spike #555	248.484	273.824
Spike #556	175.029	307.078															Spike #556	72.2453	84.0466
Spike #557	353.401	208.161															Spike #557	76.0542	103.605
Spike #558	332.304	198.022															Spike #558	171.81	173.828
Spike #559	315.709	193.751															Spike #559	188.258	88.8516
Spike #560	306.192	193.445															Spike #560	13.7282	100.219
Spike #561	282.997	197.98															Spike #561	225.215	95.26
Spike #562	259.861	205.743															Spike #562	88.8852	-117.128
Spike #563	237.373	213.662															Spike #563	99.5244	127.154
Spike #564	218.257	218.66															Spike #564	38.2834	297.989
Spike #565	1132.84	584.634															Spike #565	264.071	303.413
Spike #566	1155.4	566.249															Spike #566	-26.8364	45.1065
Spike #567	1205.17	527.181															Spike #567	657.951	1409.04
Spike #568	1229.85	508.508															Spike #568	148.321	-97.7725
Spike #569	1252.14	491.072															Spike #569	127.555	121.667
Spike #570	1257.72	485.723															Spike #570	-52.2941	96.3524
Spike #571	499.975	359.281															Spike #571	175.575	141.131
Spike #572	-350.558	574.796															Spike #572	413.708	77.2008
Spike #573	-323.579	583.773															Spike #573	213.344	966.964
Spike #574	-293.755	579.131															Spike #574	93.7292	208.59
Spike #575	-263.426	569.181															Spike #575	184.633	231.863
Spike #576	-231.285	554.608															Spike #576	212.102	172.824
Spike #577	-217.56	547.78															Spike #577	361.22	317.521
Spike #578	-207.418	543.124															Spike #578	251.091	83.4763
Spike #579	-8.98072	444.263															Spike #579	203.989	130.586
Spike #580	63.0605	468.063															Spike #580	121.687	76.7758
Spike #581	275.692	408.362															Spike #581	72.705	128.977
Spike #582	274.496	589.066															Spike #582	450.308	218.993
Spike #583	258.371	-62.448															Spike #583	144.084	288.088
Spike #584	-36.8412	306.003															Spike #584	216.836	349.284
Spike #585	1034.24	646.519															Spike #585	67.7637	217.062
Spike #586	1258.58	399.193															Spike #586	109.01	233.027
Spike #587	1252.86	381.849															Spike #587	327.962	247.128
Spike #588	1226.09	378.541															Spike #588	77.0303	109.705
Spike #589	1159.72	380.14															Spike #589	172.469	162.688
Spike #590	284.875	266.345															Spike #590	81.6083	370.542
Spike #591	276.673	263.402															Spike #591	1055.97	164.226
Spike #592	268.502	260.678															Spike #592	168.29	39.6681
Spike #593	267.461	260.798															Spike #593	64.3608	112.61
Spike #594	268.018	265.005															Spike #594	297.898	413.548
Spike #595	271.776	275.039															Spike #595	420.943	141.193
Spike #596	272.748	280.659															Spike #596	125.203	249.344
Spike #597	271.447	296.85															Spike #597	73.0453	138.142
Spike #598	493.362	495.138															Spike #598	315.352	652.845
Spike #599	359.826	238.978															Spike #599	155.228	133.728
Spike #600	340.903	243.578															Spike #600	-137.8	-95.875
Spike #601	313.617	262.92															Spike #601	-3.29191	59.7845
Spike #602	288.733	298.53															Spike #602	161.125	57.2454
Spike #603	266.141	353.411															Spike #603	63.9843	95.2583
Spike #604	251.943	410.015															Spike #604	1.8428	146.302
Spike #605	242.075	481.286															Spike #605	-350.191	240.527
Spike #606	474.219	336.59															Spike #606	174.012	39.6647
Spike #607	393.877	363.937															Spike #607	327.576	384.668
Spike #608	341.304	382.285															Spike #608	-6.65425	357.223
Spike #609	302.076	390.327															Spike #609	307.298	273.613
Spike #610	297.49	385.258															Spike #610	171.538	152.654
Spike #611	-55.3462	304.236															Spike #611	235.837	428.553
Spike #612	213.926	109.124															Spike #612	200.875	102.434
Spike #613	166.518	154.125															Spike #613	295.89	124.397
Spike #614	145.354	180.839															Spike #614	216.932	272.91
Spike #615	138.142	191.272															Spike #615	215.605	218.368
Spike #616	111.043	242.418															Spike #616	196.73	61.9526
Spike #617	100.957	289.334															Spike #617	123.841	119.642
Spike #618	101.767	298.572															Spike #618	56.4592	279.952
Spike #619	135.113	237.275															Spike #619	338.616	91.1927
Spike #620	73.6153	305.452															Spike #620	260.092	8.43304
Spike #621	-19.5382	416.691															Spike #621	160.031	221.135
Spike #622	-62.2159	491.776															Spike #622	140.933	221.558
Spike #623	-60.6437	509.376															Spike #623	19.9222	325.955
Spike #624	-46.2743	520.509															Spike #624	353.917	222.941
Spike #625	-6.7246	526.496															Spike #625	181.373	-33.4811
Spike #626	62.0625	526.426															Spike #626	132.691	383.846
Spike #627	98.0509	525.229															Spike #627	38.0188	260.344
Spike #628	89.5194	292.156															Spike #628	-22.8745	220.718
Spike #629	115.249	312.19															Spike #629	131.739	191.305
Spike #630	416.896	387.279															Spike #630	162.739	168.597
Spike #631	416.284	374.842															Spike #631	211.637	476.78
Spike #632	415.085	366.419															Spike #632	68.9973	-215.137
Spike #633	413.687	357.869															Spike #633	134.304	207.949
Spike #634	413.084	354.624															Spike #634	227.09	72.6313
Spike #635	410.404	344.142															Spike #635	301.106	-205.045
Spike #636	408.013	337.864															Spike #636	270.071	210.128
Spike #637	404.341	329.907															Spike #637	395.61	1268.3
Spike #638	394.937	313.441															Spike #638	1128.73	664.487
Spike #639	562.307	286.157															Spike #639	160.69	368.994
Spike #640	313.024	357.344															Spike #640	29.1574	124.431
Spike #641	536.676	380.033															Spike #641	267.481	315.186
Spike #642	549.062	374.204															Spike #642	394.291	-58.7129
Spike #643	526.201	372.832															Spike #643	286.914	271.765
Spike #644	501.888	372.536															Spike #644	104.222	98.0528
Spike #645	284.213	398.538															Spike #645	130.356	58.5115
Spike #646	263.838	409.579															Spike #646	119.156	119.942
Spike #647	242.378	423.979															Spike #647	158.848	106.757
Spike #648	236.075	429.695															Spike #648	1026.15	235.395
Spike #649	539.856	400.956															Spike #649	109.488	172.526
Spike #650	511.128	402.333															Spike #650	287.74	177.114
Spike #651	439.492	401.839															Spike #651	44.3369	114.749
Spike #652	275.208	286.418															Spike #652	128.925	312.314
Spike #653	305.994	158.165															Spike #653	136.78	240.984
Spike #654	313.89	-370.864															Spike #654	-4.67517	307.023
Spike #655	108.037	-136.682															Spike #655	239.119	208.242
Spike #656	76.0654	-106.305															Spike #656	104.423	187.338
Spike #657	-16.5325	-13.3124															Spike #657	172.579	241.309
Spike #658	-145.149	126.855															Spike #658	366.953	55.1696
Spike #659	-209.448	199.413															Spike #659	268.852	-7.42815
Spike #660	-316.81	326.942															Spike #660	63.5018	237.05
Spike #661	-346.86	559.633															Spike #661	142.84	203.024
Spike #662	254.206	379.651															Spike #662	139.834	206.72
Spike #663	296.338	390.943															Spike #663	119.351	-117.44
Spike #664	311.57	393.373															Spike #664	1100.81	525.814
Spike #665	330.277	394.554															Spike #665	333.449	135.771
Spike #666	350.65	391.534															Spike #666	257.455	94.3744
Spike #667	353.412	390.368															Spike #667	198.932	204.495
Spike #668	206.868	142.27															Spike #668	43.9687	36.5822
Spike #669	167.097	155.495															Spike #669	91.8588	155.824
Spike #670	134.457	170.889															Spike #670	236.019	174.475
Spike #671	111.991	198.207															Spike #671	202.354	118.9
Spike #672	113.011	206.216															Spike #672	50.0019	259.222
Spike #673	118.542	215.385															Spike #673	29.414	214.848
Spike #674	238.216	213.027															Spike #674	185.274	-100.178
Spike #675	227.215	243.703															Spike #675	148.963	103.14
Spike #676	213.817	270.08															Spike #676	126.59	447.78
Spike #677	301.432	397.939															Spike #677	236.455	210.756
Spike #678	295.617	401.031															Spike #678	182.847	93.455
Spike #679	238.072	331.982															Spike #679	170.704	137.457
Spike #680	521.145	349.537															Spike #680	163.708	78.1435
Spike #681	514.405	329.802															Spike #681	188.55	135.369
Spike #682	500.505	297.177															Spike #682	196.544	49.6594
Spike #683	485.552	271.019															Spike #683	-17.786	171.481
Spike #684	477.885	260.069															Spike #684	79.3894	156.005
Spike #685	174.84	-428.606															Spike #685	199.903	216.035
Spike #686	198.799	-416.223															Spike #686	177.649	135.538
Spike #687	158.315	-194.459															Spike #687	178.105	98.3503
Spike #688	-63.357	88.9365															Spike #688	185.774	9.01109
Spike #689	-324.566	398.418															Spike #689	217.071	111.128
Spike #690	-376.729	472.55															Spike #690	208.604	230.758
Spike #691	-420.658	557.122															Spike #691	-3.4552	96.3829
Spike #692	191.192	-6.0773															Spike #692	221.968	217.098
Spike #693	195.403	-31.3343															Spike #693	153.165	129.434
Spike #694	189.798	-11.5345															Spike #694	94.4855	187.234
Spike #695	175.611	185.685															Spike #695	109.152	157.816
Spike #696	155.499	208.112															Spike #696	99.5815	154.137
Spike #697	116.636	254.087															Spike #697	139.918	113.237
Spike #698	78.1154	306.39															Spike #698	277.559	193.202
Spike #699	55.4465	351.344															Spike #699	191.97	-98.5099
Spike #700	56.428	363.328															Spike #700	173.005	-79.4005
Spike #701	59.7915	367.364															Spike #701	-83.1599	320.008
Spike #702	77.6488	375.022															Spike #702	145.461	151.31
Spike #703	96.8492	380.054															Spike #703	120.526	266.044
Spike #704	118.622	385.636															Spike #704	176.503	203.596
Spike #705	136.266	390.673															Spike #705	223.767	87.926
Spike #706	476.5	351.482															Spike #706	516.181	1451.69
Spike #707	414.947	191.405															Spike #707	279.524	-23.0108
Spike #708	363.737	175.819															Spike #708	-77.7907	368.641
Spike #709	327.879	159.126															Spike #709	270.77	226.155
Spike #710	300.018	143.403															Spike #710	128.476	229.473
Spike #711	282.263	133.497															Spike #711	168.079	194.716
Spike #712	277.625	131.103															Spike #712	221.257	122.978
Spike #713	258.275	122.77															Spike #713	182.115	187.538
Spike #714	249.98	120.303															Spike #714	172.013	190.336
Spike #715	243.55	118.977															Spike #715	527.52	339.555
Spike #716	231.141	118.06															Spike #716	404.429	361.171
Spike #717	706.816	299.753															Spike #717	216.767	81.8982
Spike #718	588.437	295.433															Spike #718	250.864	198.063
Spike #719	362.267	310.456															Spike #719	433.532	-149.664
Spike #720	413.438	273.454															Spike #720	235.159	143.593
Spike #721	396.356	280.952															Spike #721	260.638	133.328
Spike #722	391.916	284.498															Spike #722	224.831	134.799
Spike #723	374.964	301.138															Spike #723	197.153	144.186
Spike #724	363.814	314.399															Spike #724	-46.9578	101.87
Spike #725	344.991	341.297															Spike #725	-38.427	118.021
Spike #726	335.786	356.829															Spike #726	59.8601	192.802
Spike #727	320.326	333.422															Spike #727	466.112	310.391
Spike #728	415.256	-105.432															Spike #728	394.495	319.969
Spike #729	286.296	41.6584															Spike #729	134.671	202.582
Spike #730	291.031	-82.5281															Spike #730	203.216	149.716
Spike #731	291.02	-114.236															Spike #731	235.304	120.518
Spike #732	297.985	-137.22															Spike #732	247.291	113.648
Spike #733	307.739	-142.608															Spike #733	249.001	119.074
Spike #734	308.902	-134.873															Spike #734	235.267	144.49
Spike #735	298.975	-114.797															Spike #735	47.8314	298.953
Spike #736	282.797	-91.3214															Spike #736	102.751	243.276
Spike #737	154.038	60.2527															Spike #737	117.542	175.443
Spike #738	-9.22807	233.946															Spike #738	47.6428	269.297
Spike #739	90.8727	192.615															Spike #739	132.806	213.792
Spike #740	94.0817	209.896															Spike #740	106.339	173.564
Spike #741	99.2586	220.667															Spike #741	171.187	171.924
Spike #742	103.227	227.138															Spike #742	208.726	192.961
Spike #743	114.985	242.785															Spike #743	103.032	98.489
Spike #744	127.205	256.137															Spike #744	92.3622	111.69
Spike #745	137.919	266.594															Spike #745	63.5963	172.473
Spike #746	148.414	275.577															Spike #746	525.117	16.6926
Spike #747	154.311	279.754															Spike #747	146.666	215.365
Spike #748	374.406	327.994															Spike #748	341.749	255.867
Spike #749	228.022	498.529															Spike #749	306.511	213.848
Spike #750	192.766	67.4162															Spike #750	294.698	163.654
Spike #751	144.182	48.1801															Spike #751	316.748	245.819
Spike #752	116.051	40.5595															Spike #752	133.353	246.69
Spike #753	102.512	42.297															Spike #753	141.819	261.632
Spike #754	84.7857	40.6758															Spike #754	159.735	299.857
Spike #755	-177.261	392.811															Spike #755	316.218	-56.4828
Spike #756	-115.031	426.028															Spike #756	263.909	230.547
Spike #757	197.227	440.54															Spike #757	338.522	215.772
Spike #758	250.791	441.335															Spike #758	360.796	219.676
Spike #759	279.331	437.057															Spike #759	238.936	124.263
Spike #760	295.879	431.598															Spike #760	184.489	158.045
Spike #761	326.932	421.616															Spike #761	162.977	174.061
Spike #762	338.373	418.295															Spike #762	95.7802	248.634
Spike #763	-100.009	573.813															Spike #763	110.488	244.575
Spike #764	398.629	518.235															Spike #764	194.389	116.729
Spike #765	86.8111	106.758															Spike #765	172.049	103.948
Spike #766	47.7764	146.708															Spike #766	153.244	96.2166
Spike #767	31.0738	169.483															Spike #767	154.263	142.08
Spike #768	20.4395	191.815															Spike #768	102.462	151.93
Spike #769	17.5998	204.5															Spike #769	112.782	144.546
Spike #770	24.6269	240.984															Spike #770	123.745	141.412
Spike #771	196.086	368.708															Spike #771	129.494	140.964
Spike #772	122.564	-16.5928															Spike #772	185.36	184.868
Spike #773	-169.156	297.371															Spike #773	356.582	139.442
Spike #774	-132.415	307.156															Spike #774	259.331	-139.793
Spike #775	189.695	210.948															Spike #775	116.614	-190.707
Spike #776	202.714	419.842															Spike #776	88.3396	-189.86
Spike #777	81.8544	652.546															Spike #777	-50.9069	-132.26
Spike #778	219.485	180.108															Spike #778	6.52886	-107.34
Spike #779	213.232	179.596															Spike #779	-43.2179	146.087
Spike #780	208.725	178.61															Spike #780	74.3709	191.068
Spike #781	194.59	171.386															Spike #781	117.092	76.7524
Spike #782	189.929	167.516															Spike #782	113.584	66.1395
Spike #783	177.326	155.752															Spike #783	105.45	52.95
Spike #784	173.496	153.191															Spike #784	108.568	57.3874
Spike #785	167.82	153.435															Spike #785	114.37	67.8393
Spike #786	166.338	160.328															Spike #786	-9.82824	104.783
Spike #787	168.24	171.906															Spike #787	295.339	-19.2806
Spike #788	-201.136	523.266															Spike #788	197.054	-103.15
Spike #789	-255.488	673.099															Spike #789	181.303	93.1728
Spike #790	-250.201	712.279															Spike #790	97.3274	115.652
Spike #791	-212.413	755.962															Spike #791	68.2249	118.316
Spike #792	401.903	168.918															Spike #792	31.0961	124.23
Spike #793	180.216	174.827															Spike #793	38.5064	133.2
Spike #794	89.916	87.4384															Spike #794	47.6155	271.506
Spike #795	71.5488	98.8183															Spike #795	212.191	190.218
Spike #796	42.7281	139.991															Spike #796	179.813	197.458
Spike #797	24.6235	270.64															Spike #797	196.907	175.838
Spike #798	535.974	311.651															Spike #798	206.186	166.786
Spike #799	522.821	302.428															Spike #799	-77.6731	129.598
Spike #800	447.251	249.272															Spike #800	-57.6411	122.282
Spike #801	537.556	128.994															Spike #801	202.249	3.05454
Spike #802	204.336	-7.92554															Spike #802	185.274	20.7027
Spike #803	175.428	43.9144															Spike #803	60.5295	346.348
Spike #804	144.152	97.9638															Spike #804	95.5755	80.6266
Spike #805	-41.1685	511.949															Spike #805	59.73	106.711
Spike #806	634.717	1370.54															Spike #806	-13.9005	120.989
Spike #807	713.427	1293.08															Spike #807	-3.57694	57.5128
Spike #808	1209.83	776.839															Spike #808	22.9271	26.3202
Spike #809	1250.5	737.15															Spike #809	460.406	1335.29
Spike #810	1377.18	598.12															Spike #810	661.673	1205.65
Spike #811	189.466	386.684															Spike #811	683.083	1153.02
Spike #812	449.666	-109.225															Spike #812	234.866	201.91
Spike #813	-6.42343	319.757															Spike #813	213.572	223.124
Spike #814	286.783	228.686															Spike #814	203.977	227.464
Spike #815	247.417	285.935															Spike #815	176.569	222.843
Spike #816	-3.63266	206.292															Spike #816	166.998	211.009
Spike #817	3.48885	274.986															Spike #817	163.82	196.765
Spike #818	59.2415	278.46															Spike #818	278.105	121.691
Spike #819	610.458	486.095															Spike #819	201.316	238.667
Spike #820	604.78	482.377															Spike #820	174.712	295.809
Spike #821	217.256	255.967															Spike #821	146.204	355.786
Spike #822	211.614	276.161															Spike #822	135.422	375.567
Spike #823	188.182	369.974															Spike #823	124.635	393.541
Spike #824	169.668	490.569															Spike #824	266.966	101.162
Spike #825	165.953	533.274															Spike #825	180.111	184.322
Spike #826	162.06	700.383															Spike #826	-10.2549	188.334
Spike #827	177.224	811.81															Spike #827	-19.6258	234.898
Spike #828	432.077	160.893															Spike #828	32.4733	334.185
Spike #829	44.9359	21.2309															Spike #829	68.1084	361.096
Spike #830	-8.14135	169.947															Spike #830	102.154	375.842
Spike #831	-10.8492	221.501															Spike #831	37.8907	246.447
Spike #832	-6.67404	302.5															Spike #832	37.3676	246.627
Spike #833	308.243	70.1624															Spike #833	79.1745	227.324
Spike #834	146.119	202.523															Spike #834	180.952	167.317
Spike #835	108.146	253.941															Spike #835	212.694	138.153
Spike #836	88.2542	259.549															Spike #836	229.565	116.631
Spike #837	95.3837	275.561															Spike #837	41.9659	329.993
Spike #838	201.019	134.395															Spike #838	218.967	55.9416
Spike #839	391.527	369.437															Spike #839	246.168	-3.31224
Spike #840	395.402	377.216															Spike #840	372.254	74.5328
Spike #841	387.959	-155.554															Spike #841	371.112	16.0529
Spike #842	250.697	0.529261															Spike #842	234.275	189.348
Spike #843	108.749	228.714															Spike #843	221.771	205.942
Spike #844	112.521	283.637															Spike #844	174.015	250.236
Spike #845	119.876	293.254															Spike #845	119.787	253.987
Spike #846	374.356	15.4476															Spike #846	100.397	234.342
Spike #847	366.418	13.4752															Spike #847	133.247	214.714
Spike #848	295.411	51.5712															Spike #848	379.246	245.533
Spike #849	254.829	114.558															Spike #849	379.524	248.298
Spike #850	297.849	264.901															Spike #850	368.638	256.447
Spike #851	215.297	145.005															Spike #851	308.547	308.063
Spike #852	-272.206	503.114															Spike #852	-193.469	273.513
Spike #853	12.8457	586.97															Spike #853	286.693	248.595
Spike #854	117.098	307.382															Spike #854	374.364	138.959
Spike #855	262.685	286.185															Spike #855	223.102	46.0642
Spike #856	1043.34	522.072															Spike #856	500.142	-106.547
Spike #857	1178.75	132.364															Spike #857	-295.609	389.245
Spike #858	164.052	143.426															Spike #858	-213.59	390.46
Spike #859	-210.038	357.239															Spike #859	120.694	513.503
Spike #860	-23.5293	351.409															Spike #860	198.513	33.3301
Spike #861	92.1069	168.856															Spike #861	186.792	40.2814
Spike #862	603.351	512.066															Spike #862	174.52	51.2524
Spike #863	234.448	465.443															Spike #863	149.098	76.8237
Spike #864	135.802	247.226															Spike #864	124.231	102.939
Spike #865	177.898	272.673															Spike #865	66.5369	164.354
Spike #866	267.866	359.176															Spike #866	44.8192	190.669
Spike #867	206.902	274.301															Spike #867	363.622	110.858
Spike #868	186.245	152.564															Spike #868	314.411	122.525
Spike #869	217.706	52.2263															Spike #869	243.799	161.599
Spike #870	142.141	112.203															Spike #870	139.545	282.606
Spike #871	204.298	168.135															Spike #871	383.666	259.158
Spike #872	234.764	212.741															Spike #872	374.714	258.546
Spike #873	222.476	207.505															Spike #873	364.078	258.233
Spike #874	219.809	210.862															Spike #874	350.075	258.289
Spike #875	222.952	243.092															Spike #875	972.904	282.812
Spike #876	741.44	416.247															Spike #876	646.01	291.8
Spike #877	649.634	415.116															Spike #877	311.889	343.506
Spike #878	566.91	437.676															Spike #878	317.793	360.747
Spike #879	546.353	447.088															Spike #879	317.568	368.003
Spike #880	185.336	248.9															Spike #880	315.557	364.572
Spike #881	344.938	257.822															Spike #881	154.012	502.32
Spike #882	284.825	294.489															Spike #882	289.983	170.369
Spike #883	271.825	305.453															Spike #883	228.992	155.855
Spike #884	254.536	323.996															Spike #884	206.245	147.216
Spike #885	473.167	431.405															Spike #885	181.307	135.109
Spike #886	490.903	405.941															Spike #886	61.3732	117.143
Spike #887	505.901	390.572															Spike #887	51.293	146.106
Spike #888	509.44	385.917															Spike #888	50.1423	211.567
Spike #889	501.759	381.664															Spike #889	208.159	169.732
Spike #890	394.386	-96.1933															Spike #890	204.286	160.595
Spike #891	-202.464	500.428															Spike #891	1046.71	213.529
Spike #892	-260.829	540.905															Spike #892	987.939	200.777
Spike #893	345.593	341.789															Spike #893	528.675	207.213
Spike #894	328.588	356.258															Spike #894	376.683	212.685
Spike #895	312.198	369.866															Spike #895	336.247	224.596
Spike #896	310.018	372.092															Spike #896	280.843	258.118
Spike #897	307.746	375.47															Spike #897	265.782	270.56
Spike #898	309.435	382.393															Spike #898	241.022	295.201
Spike #899	339.349	246.43															Spike #899	225.437	314.511
Spike #900	288.704	157.417															Spike #900	215.856	125.169
Spike #901	278.759	166.215															Spike #901	194.173	168.448
Spike #902	182.19	227.378															Spike #902	183.547	198.496
Spike #903	-125.905	353.319															Spike #903	199.034	185.332
Spike #904	-64.1737	466.562															Spike #904	-67.3554	319.798
Spike #905	98.7291	433.413															Spike #905	-59.9049	333.31
Spike #906	154.256	421.474															Spike #906	-31.3159	336.156
Spike #907	234.313	413.295															Spike #907	29.2641	326.696
Spike #908	149.819	206.549															Spike #908	320.769	184.96
Spike #909	131.447	223.069															Spike #909	316.374	188.1
Spike #910	85.3884	263.045															Spike #910	283.556	200.65
Spike #911	92.4796	294.32															Spike #911	251.121	211.222
Spike #912	143.615	316.558															Spike #912	241.493	214.203
Spike #913	176.632	328.969															Spike #913	211.044	222.984
Spike #914	29.7396	250.994															Spike #914	203.783	224.847
Spike #915	215.819	160.257															Spike #915	198.753	226.031
Spike #916	140.788	245.38															Spike #916	188.149	227.891
Spike #917	260.156	447.026															Spike #917	185.479	227.901
Spike #918	8.62065	581.008															Spike #918	216.117	195.234
Spike #919	304.248	245.66															Spike #919	210.419	193.551
Spike #920	111.369	-27.098															Spike #920	207.103	194.706
Spike #921	-80.3579	65.8729															Spike #921	204.674	195.678
Spike #922	403.215	189.997															Spike #922	202.652	195.077
Spike #923	358.726	213.851															Spike #923	116.87	73.8012
Spike #924	286.716	270.131															Spike #924	105.728	64.9556
Spike #925	214.337	168.296															Spike #925	97.6683	54.2258
Spike #926	200.224	47.4862															Spike #926	89.5449	36.7173
Spike #927	328.051	-223.007															Spike #927	84.8069	55.7267
Spike #928	198.993	-38.7404															Spike #928	-220.071	220.933
Spike #929	8.39338	164.495															Spike #929	-232.325	220.36
Spike #930	229.562	230.071															Spike #930	-242.241	208.537
Spike #931	245.201	167.159															Spike #931	-243.298	201.625
Spike #932	214.496	183.189															Spike #932	-173.239	163.006
Spike #933	190.127	193.136															Spike #933	-127.398	157.641
Spike #934	165.359	199.129															Spike #934	73.3689	147.761
Spike #935	152.196	200.273															Spike #935	143.331	146.037
Spike #936	132.675	199.234															Spike #936	473.756	407.424
Spike #937	647.814	413.779															Spike #937	276.306	252.265
Spike #938	598.777	396.244															Spike #938	273.175	231.591
Spike #939	503.205	427.012															Spike #939	92.689	138.964
Spike #940	435.632	490.218															Spike #940	156.665	94.6892
Spike #941	277.335	-298.577															Spike #941	160.567	97.2824
Spike #942	-371.511	341.51															Spike #942	161.901	111.37
Spike #943	-364.356	344.88															Spike #943	157.966	130.709
Spike #944	287.677	205.256															Spike #944	151.655	152.005
Spike #945	230.023	248.415															Spike #945	143.713	191.871
Spike #946	224.964	250.979															Spike #946	138.264	214.084
Spike #947	207.816	250.238															Spike #947	129.288	246.259
Spike #948	-31.8896	280.022															Spike #948	120.636	278.523
Spike #949	262.059	446.372															Spike #949	170.945	145.735
Spike #950	358.042	212.724															Spike #950	189.867	124.362
Spike #951	333.577	204.721															Spike #951	198.807	164.993
Spike #952	262.638	200.94															Spike #952	178.989	197.451
Spike #953	231.496	193.455															Spike #953	222.815	149.972
Spike #954	223.139	188.678															Spike #954	249.073	153.928
Spike #955	531.827	1354.01															Spike #955	142.253	200.811
Spike #956	170.957	328.933															Spike #956	104.436	230.632
Spike #957	560.043	296.135															Spike #957	82.6036	248.929
Spike #958	532.411	280.55															Spike #958	94.6089	162.379
Spike #959	434.921	233.271															Spike #959	72.4022	199.341
Spike #960	231.492	356.398															Spike #960	65.4301	231.356
Spike #961	212.844	56.0945															Spike #961	65.506	244.1
Spike #962	227.912	-118.727															Spike #962	69.5594	269.288
Spike #963	622.682	296.977															Spike #963	75.1774	286.091
Spike #964	416.283	141.626															Spike #964	94.9458	310.226
Spike #965	274.281	53.9762															Spike #965	114.005	313.919
Spike #966	225.252	82.6211															Spike #966	415.608	256.669
Spike #967	191.79	107.262															Spike #967	403.066	251.057
Spike #968	109.56	169.582															Spike #968	354.424	247.555
Spike #969	91.241	183.122															Spike #969	326.643	251.734
Spike #970	71.9192	197.795															Spike #970	303.514	259.539
Spike #971	57.4536	210.748															Spike #971	305.536	272.268
Spike #972	237.199	127.748															Spike #972	147.432	180.656
Spike #973	527.968	219.202															Spike #973	151.246	178.746
Spike #974	981.107	582.281															Spike #974	154.131	176.279
Spike #975	1258.81	289.101															Spike #975	156.737	173.801
Spike #976	1316.9	160.455															Spike #976	158.688	171.951
Spike #977	245.284	144.268															Spike #977	160.753	170.204
Spike #978	103.277	-18.5551															Spike #978	163.131	168.488
Spike #979	415.615	-40.1127															Spike #979	168.354	166.566
Spike #980	384.233	-95.004															Spike #980	172.681	168.051
Spike #981	361.747	334.289															Spike #981	175.488	171.165
Spike #982	345.098	354.823															Spike #982	250.485	163.113
Spike #983	323.821	392.662															Spike #983	223.264	164.78
Spike #984	-273.259	385.163															Spike #984	190.178	161.218
Spike #985	-147.166	283.223															Spike #985	150.932	137.338
Spike #986	-54.2318	229.527															Spike #986	259.104	137.314
Spike #987	28.9625	196.653															Spike #987	247.969	142.179
Spike #988	400.853	86.4682															Spike #988	209.221	162.066
Spike #989	118.578	98.0107															Spike #989	193.295	171.514
Spike #990	111.756	115.03															Spike #990	165.264	190.25
Spike #991	87.5417	164.795															Spike #991	148.723	203.132
Spike #992	53.2424	219.453															Spike #992	135.603	215.308
Spike #993	112.233	164.979															Spike #993	125.689	227.806
Spike #994	95.1441	150.42															Spike #994	121.033	239.113
Spike #995	40.4734	159.867															Spike #995	121.205	249.517
Spike #996	10.553	216.835															Spike #996	124.891	258.165
Spike #997	153.776	-46.41															Spike #997	247.704	169.316
Spike #998	599.663	157.575															Spike #998	224.652	172.095
Spike #999	574.21	167.991															Spike #999	213.319	174.915
Spike #1000	527.807	195.603															Spike #1000	201.157	179.398
Spike #1001	486.17	221.283															Spike #1001	186.773	186.18
Spike #1002	289.295	324.095															Spike #1002	178.925	188.828
Spike #1003	652.224	525.46															Spike #1003	170.305	179.892
Spike #1004	589.213	108.056															Spike #1004	172.218	243.8
Spike #1005	-22.8505	355.171															Spike #1005	167.008	241.62
Spike #1006	117.794	421.428															Spike #1006	168.606	236.922
Spike #1007	-135.484	329.771															Spike #1007	182.132	225.666
Spike #1008	424.496	72.2328															Spike #1008	191.514	220.576
Spike #1009	360.048	119.546															Spike #1009	207.816	214.304
Spike #1010	338.292	163.075															Spike #1010	64.0746	166.512
Spike #1011	233.217	333.163															Spike #1011	124.764	166.35
Spike #1012	422.044	167.592															Spike #1012	173.644	170.792
Spike #1013	354.484	152.601															Spike #1013	205.682	179.964
Spike #1014	341.442	285.649															Spike #1014	212.865	198.199
Spike #1015	339.45	323.268															Spike #1015	202.099	213.143
Spike #1016	42.0529	130.322															Spike #1016	182.104	235.855
Spike #1017	6.88583	94.1012															Spike #1017	-13.6085	284.147
Spike #1018	-2.31907	201.917															Spike #1018	6.05153	281.787
Spike #1019	-112.837	536.321															Spike #1019	35.8259	278.14
Spike #1020	276.015	102.699															Spike #1020	84.5387	272.653
Spike #1021	216.431	208.475															Spike #1021	99.0732	271.255
Spike #1022	171.318	144.767															Spike #1022	159.822	265.984
Spike #1023	163.271	235.761															Spike #1023	199.096	263.035
Spike #1024	84.6267	367.006															Spike #1024	232.903	260.698
Spike #1025	265.841	288.02															Spike #1025	264.604	258.706
Spike #1026	316.185	460.876															Spike #1026	152.033	-56.1802
Spike #1027	-92.3089	479.491															Spike #1027	172.573	-46.0848
Spike #1028	128.769	348.059															Spike #1028	167.437	-0.702482
Spike #1029	47.5088	474.792															Spike #1029	8.22973	193.025
Spike #1030	26.3652	537.044															Spike #1030	-31.8971	234.464
Spike #1031	848.589	230.563															Spike #1031	-52.7815	265.618
Spike #1032	75.1929	382.146															Spike #1032	200.987	169.744
Spike #1033	38.9708	419.709															Spike #1033	199.653	146.822
Spike #1034	33.4579	476.656															Spike #1034	203.111	117.984
Spike #1035	52.7892	484.013															Spike #1035	209.558	94.6049
Spike #1036	215.29	231.685															Spike #1036	212.878	85.5264
Spike #1037	184.6	249.541															Spike #1037	214.303	81.9562
Spike #1038	514.928	295.812															Spike #1038	215.966	76.5699
Spike #1039	453.246	264.888															Spike #1039	213.664	79.8339
Spike #1040	386.518	196.578															Spike #1040	161.977	247.329
Spike #1041	363.856	147.846															Spike #1041	169.752	221.824
Spike #1042	303.238	180.234															Spike #1042	178.753	125.77
Spike #1043	280.322	302.119															Spike #1043	203.667	-150.789
Spike #1044	267.105	318.503															Spike #1044	217.139	-188.442
Spike #1045	255.999	450.658															Spike #1045	164.811	105.29
Spike #1046	381.015	356.011															Spike #1046	175.514	86.7359
Spike #1047	327.403	357.155															Spike #1047	181.614	87.525
Spike #1048	318.646	259.296															Spike #1048	169.538	113.588
Spike #1049	341.704	230.527															Spike #1049	158.094	134.645
Spike #1050	218.651	112.481															Spike #1050	254.956	703.329
Spike #1051	210.009	359.703															Spike #1051	242.063	860.243
Spike #1052	218.727	380.283															Spike #1052	299.804	962.441
Spike #1053	119.147	27.9088															Spike #1053	329.987	187.453
Spike #1054	95.4441	117.141															Spike #1054	340.81	212.694
Spike #1055	-112.336	294.289															Spike #1055	320.246	241.489
Spike #1056	-173.053	382.691															Spike #1056	257.388	301.526
Spike #1057	195.264	136.378															Spike #1057	140.358	156.927
Spike #1058	197.021	164.334															Spike #1058	148.095	166.921
Spike #1059	193.805	180.309															Spike #1059	156.177	216.485
Spike #1060	144.751	334.782															Spike #1060	150.958	239.404
Spike #1061	137.81	354.814															Spike #1061	146.454	247.2
Spike #1062	244.95	135.594															Spike #1062	146.239	244.111
Spike #1063	10.3402	173.501															Spike #1063	154.137	232.376
Spike #1064	200.156	268.913															Spike #1064	309.418	168.539
Spike #1065	411.91	236.808															Spike #1065	124.429	189.328
Spike #1066	414.495	111.304															Spike #1066	236.702	197.865
Spike #1067	399.519	-44.6076															Spike #1067	529.82	1092.09
Spike #1068	418.192	1090.32															Spike #1068	218.314	178.269
Spike #1069	428.141	1158.75															Spike #1069	-53.4818	189.623
Spike #1070	436.02	1194.32															Spike #1070	-22.9951	71.2698
Spike #1071	474.098	1288.63															Spike #1071	-65.2754	116.565
Spike #1072	347.388	196.053															Spike #1072	131.116	214.728
Spike #1073	211.568	250.154															Spike #1073	266.595	55.191
Spike #1074	36.5361	121.509															Spike #1074	54.1542	160.151
Spike #1075	634.767	290.77															Spike #1075	276.978	290.048
Spike #1076	295.308	122.103															Spike #1076	183.686	117.936
Spike #1077	257.838	125.571															Spike #1077	125.946	11.3135
Spike #1078	247.867	128.112															Spike #1078	224.947	148.676
Spike #1079	208.557	147.707															Spike #1079	-316.047	351.836
Spike #1080	156.571	196.85															Spike #1080	301.322	218.085
Spike #1081	141.907	215.491															Spike #1081	219.812	244.475
Spike #1082	293.664	179.133															Spike #1082	177.353	246.772
Spike #1083	264.36	195.997															Spike #1083	-161.218	191.754
Spike #1084	232.002	216.18															Spike #1084	147.884	176.284
Spike #1085	198.068	233.062															Spike #1085	169.198	126.673
Spike #1086	185.277	237.198															Spike #1086	521.266	1311.94
Spike #1087	140.35	34.9928															Spike #1087	1195.92	669.196
Spike #1088	-29.7493	379.747															Spike #1088	275.179	395.956
Spike #1089	-5.29977	406.105															Spike #1089	190.154	201.65
Spike #1090	22.0256	165.127															Spike #1090	151.787	385.061
Spike #1091	358.094	167.832															Spike #1091	91.3442	112.883
Spike #1092	323.24	151.611															Spike #1092	120.953	330.207
Spike #1093	248.921	207.034															Spike #1093	283.777	77.1786
Spike #1094	135.675	343.7															Spike #1094	236.788	81.3488
Spike #1095	133.971	348.895															Spike #1095	-107.987	317.349
Spike #1096	476.789	-106.634															Spike #1096	197.902	222.492
Spike #1097	442.58	-124.528															Spike #1097	117.576	8.37032
Spike #1098	407.032	-121.148															Spike #1098	-38.5936	363.032
Spike #1099	445.025	406.215															Spike #1099	-29.6033	313.01
Spike #1100	195.658	144.192															Spike #1100	491.713	209.695
Spike #1101	190.919	116.427															Spike #1101	17.1907	76.9575
Spike #1102	186.555	86.7138															Spike #1102	1360.21	311.373
Spike #1103	174.516	78.4749															Spike #1103	-217.762	419.127
Spike #1104	302.191	65.849															Spike #1104	141.32	-6.47096
Spike #1105	272.756	103.926															Spike #1105	160.061	295.846
Spike #1106	240.243	141.215															Spike #1106	138.446	-34.3216
Spike #1107	191.039	199.59															Spike #1107	165.073	160.26
Spike #1108	84.2513	240.506															Spike #1108	342.489	228.151
Spike #1109	129.747	216.983															Spike #1109	43.3132	195.499
Spike #1110	166.691	120.811															Spike #1110	65.3344	133.015
Spike #1111	205.965	45.5173															Spike #1111	304.431	81.3354
Spike #1112	296.238	230.713															Spike #1112	171.444	243.999
Spike #1113	285.191	230.184															Spike #1113	192.507	298.677
Spike #1114	270.122	228.746															Spike #1114	299.588	123.119
Spike #1115	226.476	212.244															Spike #1115	179.511	203.624
Spike #1116	228.988	208.206															Spike #1116	285.355	162.371
Spike #1117	230.493	211.988															Spike #1117	488.658	217.446
Spike #1118	297.746	267.952															Spike #1118	-428.487	354.974
Spike #1119	289.974	293.088															Spike #1119	-331.279	306.092
Spike #1120	140.314	190.183															Spike #1120	-2.75453	123.545
Spike #1121	143.629	212.361															Spike #1121	63.4334	-63.3283
Spike #1122	143.487	219.623															Spike #1122	276.963	329.453
Spike #1123	138.499	245.095															Spike #1123	184.497	409.04
Spike #1124	138.821	244.576															Spike #1124	294.493	169.526
Spike #1125	273.635	126.942															Spike #1125	370.165	1307.72
Spike #1126	160.919	200.114															Spike #1126	208.79	184.475
Spike #1127	104.198	232.507															Spike #1127	119.117	325.405
Spike #1128	-281.763	441.646															Spike #1128	197.5	61.9467
Spike #1129	339.92	289.162															Spike #1129	255.973	400.956
Spike #1130	816.141	406.222															Spike #1130	-206.705	461.589
Spike #1131	-399.577	225.767															Spike #1131	-152.502	232.601
Spike #1132	331.564	278.319															Spike #1132	21.9781	297.492
Spike #1133	362.456	216.306															Spike #1133	98.4402	288.194
Spike #1134	54.8665	45.7684															Spike #1134	247.82	294.451
Spike #1135	351.319	76.8503															Spike #1135	160.751	71.865
Spike #1136	216.328	524.636															Spike #1136	181.835	213.932
Spike #1137	317.882	228.371															Spike #1137	151.823	292.272
Spike #1138	-63.3151	319.772															Spike #1138	185.454	283.782
Spike #1139	250.411	325.917															Spike #1139	227.764	283.618
Spike #1140	34.6316	94.8027															Spike #1140	290.178	372.09
Spike #1141	97.2498	393.795															Spike #1141	354.028	165.5
Spike #1142	1249.19	479.636															Spike #1142	25.4181	82.0467
Spike #1143	1211.72	467.488															Spike #1143	289.208	113.115
Spike #1144	1082.54	459.699															Spike #1144	286.878	87.7876
Spike #1145	-296.09	472.099															Spike #1145	-294.894	134.524
Spike #1146	118.496	480.466															Spike #1146	283.348	219.14
Spike #1147	166.27	464.895															Spike #1147	77.1007	169.017
Spike #1148	442.672	426.747															Spike #1148	963.898	762.453
Spike #1149	604.101	1119.54															Spike #1149	253.368	291.8
Spike #1150	594.022	1263.8															Spike #1150	-82.1353	257.389
Spike #1151	160.109	240.943															Spike #1151	-233.943	187.077
Spike #1152	653.802	-117.952															Spike #1152	318.767	150.474
Spike #1153	163.107	283.431															Spike #1153	-84.0099	198.014
Spike #1154	350.062	270.051															Spike #1154	296.459	238.148
Spike #1155	982.315	546.915															Spike #1155	244.651	303.622
Spike #1156	843.772	524.908															Spike #1156	227.115	250.042
Spike #1157	1346.38	332.577															Spike #1157	82.4747	212.005
Spike #1158	295.353	607.001															Spike #1158	150.714	308.659
Spike #1159	299.163	303.084															Spike #1159	256.937	203.923
Spike #1160	333.85	220.303															Spike #1160	257.334	308.924
Spike #1161	276.998	261.039															Spike #1161	155.1	107.674
Spike #1162	218.139	337.445															Spike #1162	292.604	147.454
Spike #1163	134.3	215.035															Spike #1163	502.275	276.013
Spike #1164	1562.87	597.899															Spike #1164	149.546	182.587
Spike #1165	378.505	292.594															Spike #1165	129.153	253.649
Spike #1166	824.909	421.288															Spike #1166	290.072	28.423
Spike #1167	609.048	414.321															Spike #1167	132.256	177.527
Spike #1168	1172.97	488.592															Spike #1168	98.9364	213.063
Spike #1169	207.037	170.212															Spike #1169	114.897	272.711
Spike #1170	174.961	193.036															Spike #1170	93.4614	93.841
Spike #1171	162.189	205.345															Spike #1171	354.884	343.669
Spike #1172	206.178	309.75															Spike #1172	337.545	366.208
Spike #1173	241.858	182.069															Spike #1173	320.683	414.762
Spike #1174	230.604	170.113															Spike #1174	413.272	411.401
Spike #1175	327.396	365.183															Spike #1175	-13.3392	377.433
Spike #1176	651.595	404.959															Spike #1176	306.803	-116.131
Spike #1177	1312.85	519.472															Spike #1177	133.269	97.1144
Spike #1178	552.168	340.103															Spike #1178	312.018	489.496
Spike #1179	442.343	343.285															Spike #1179	335.25	253.005
Spike #1180	359.658	166.639															Spike #1180	146.373	253.609
Spike #1181	167.692	296.912															Spike #1181	208.809	267.844
Spike #1182	622.833	399.397															Spike #1182	222.361	241.888
Spike #1183	193.179	451.756															Spike #1183	102.893	259.723
Spike #1184	-131.526	142.266															Spike #1184	264.648	383.693
Spike #1185	137.181	237.559															Spike #1185	299.523	120.328
Spike #1186	546.557	261.229															Spike #1186	281.992	132.394
Spike #1187	510.374	186.441															Spike #1187	233.128	327.011
Spike #1188	474.755	313.299															Spike #1188	469.306	298.267
Spike #1189	1221.57	516.842															Spike #1189	365.654	426.501
Spike #1190	441.978	345.712															Spike #1190	52.3879	179.653
Spike #1191	379.259	374.385															Spike #1191	-8.23801	295.405
Spike #1192	442.968	211.055															Spike #1192	327.666	281.82
Spike #1193	324.67	260.065															Spike #1193	20.174	212.766
Spike #1194	301.519	132.669															Spike #1194	75.8928	224.903
Spike #1195	255.387	148.063															Spike #1195	341.81	694.69
Spike #1196	168.81	217.951															Spike #1196	446.71	240.323
Spike #1197	141.237	262.193															Spike #1197	-288.061	825.539
Spike #1198	477.068	513.743															Spike #1198	214.943	297.526
Spike #1199	-119.986	459.497															Spike #1199	-269.914	266.06
Spike #1200	-96.0941	458.79															Spike #1200	144.761	240.3
Spike #1201	469.453	185.992															Spike #1201	319.013	-32.4937
Spike #1202	243.853	308.816															Spike #1202	147.685	259.942
Spike #1203	-92.0584	375.115															Spike #1203	280.247	343.542
Spike #1204	273.491	464.478															Spike #1204	395.045	262.45
Spike #1205	-157.296	409.654															Spike #1205	448.957	139.855
Spike #1206	52.3251	198.796															Spike #1206	-286.308	543.39
Spike #1207	314.556	171.977															Spike #1207	621.416	543.409
Spike #1208	236.347	663.129															Spike #1208	-34.6235	420.476
Spike #1209	282.956	761.139															Spike #1209	236.065	183.698
Spike #1210	58.4298	525.817															Spike #1210	438.582	330.826
Spike #1211	215.934	399.276															Spike #1211	-206.561	186.568
Spike #1212	1095.65	383.133															Spike #1212	254.131	191.277
Spike #1213	1019.32	341.499															Spike #1213	262.057	80.5961
Spike #1214	193.631	249.509															Spike #1214	200.748	342.782
Spike #1215	283.022	321.169															Spike #1215	250.139	237.523
Spike #1216	-41.2093	262.441															Spike #1216	259.6	273.798
Spike #1217	-187.846	473.994															Spike #1217	423.521	190.351
Spike #1218	87.3717	96.4068															Spike #1218	331.241	226.768
Spike #1219	-16.4547	364.189															Spike #1219	293.128	309.003
Spike #1220	100.513	472.91															Spike #1220	-266.152	535.62
Spike #1221	70.973	489.726															Spike #1221	58.9004	95.1128
Spike #1222	56.8357	483.794															Spike #1222	-104.196	107.863
Spike #1223	458.167	191.254															Spike #1223	377.686	120.847
Spike #1224	261.548	249.085															Spike #1224	51.5672	353.373
Spike #1225	264.829	269.112															Spike #1225	177.288	252.885
Spike #1226	218.665	286.062															Spike #1226	-143.823	381.516
Spike #1227	184.239	281.047															Spike #1227	204.533	746
Spike #1228	204.511	268.366															Spike #1228	232.142	426.531
Spike #1229	422.109	329.11															Spike #1229	236.214	242.971
Spike #1230	387.955	292.671															Spike #1230	176.148	281.612
Spike #1231	122.735	177.833															Spike #1231	227.347	534.257
Spike #1232	213.509	250.804															Spike #1232	308.2	285.855
Spike #1233	980.064	470.433															Spike #1233	211.125	248.901
Spike #1234	536.961	475.405															Spike #1234	120.583	220.678
Spike #1235	372.124	321.443															Spike #1235	-60.9198	168.9
Spike #1236	381.929	148.747															Spike #1236	341.493	144.238
Spike #1237	229.517	247.578															Spike #1237	1121.29	375.11
Spike #1238	191.938	293.239															Spike #1238	173.163	453.798
Spike #1239	378.99	270.091															Spike #1239	200.001	271.638
Spike #1240	344.123	68.5673															Spike #1240	554.314	399.533
Spike #1241	317.149	231.149															Spike #1241	264.525	128.274
Spike #1242	270.121	238.735															Spike #1242	284.733	138.918
Spike #1243	234.519	243.333															Spike #1243	-258.816	450.647
Spike #1244	110.131	349.607															Spike #1244	139.498	475.158
Spike #1245	-90.9717	381.014															Spike #1245	296.003	397.764
Spike #1246	111.615	-84.6437															Spike #1246	874.797	870.016
Spike #1247	396.07	223.912															Spike #1247	330.332	857.866
Spike #1248	366.822	230.157															Spike #1248	379.077	320.957
Spike #1249	378.331	216.959															Spike #1249	201.576	81.4071
Spike #1250	-190.513	294.594															Spike #1250	-294.619	382.71
Spike #1251	-245.289	272.248															Spike #1251	208.413	386.948
Spike #1252	-143.226	266.022															Spike #1252	381.324	-19.1658
Spike #1253	-70.2921	208.349															Spike #1253	340.212	343.862
Spike #1254	40.6133	193.046															Spike #1254	124.739	291.843
Spike #1255	231.339	203.789															Spike #1255	152.656	44.4606
Spike #1256	253.128	296.05															Spike #1256	312.721	280.212
Spike #1257	274.137	578.518															Spike #1257	272.523	381.712
Spike #1258	202.471	330.534															Spike #1258	-62.2041	410.147
Spike #1259	232.271	316.471															Spike #1259	177.14	213.693
Spike #1260	181.523	232.926															Spike #1260	481.456	374.56
Spike #1261	185.544	253.172															Spike #1261	389.226	405.377
Spike #1262	191.734	271.782															Spike #1262	707.266	201.16
Spike #1263	253.169	217.404															Spike #1263	800.944	364.617
Spike #1264	333.525	143.088															Spike #1264	-78.7164	380.362
Spike #1265	285.128	209.313															Spike #1265	244.33	529.167
Spike #1266	223.657	308.723															Spike #1266	-187.865	343.855
Spike #1267	791.069	911.776															Spike #1267	472.565	400.889
Spike #1268	830.213	868.578															Spike #1268	333.708	441.123
Spike #1269	919.37	767.351															Spike #1269	363.377	188.342
Spike #1270	967.687	540.231															Spike #1270	428.956	240.494
Spike #1271	896.115	432.731															Spike #1271	454.298	1179.84
Spike #1272	340.919	254.434															Spike #1272	970.018	1032.65
Spike #1273	298.159	133.463															Spike #1273	493.488	247.133
Spike #1274	30.6063	95.9265															Spike #1274	292.395	298.633
Spike #1275	132.228	290.907															Spike #1275	1095.45	-95.3486
Spike #1276	152.664	48.882															Spike #1276	-226.463	862.445
Spike #1277	150.393	159.702															Spike #1277	156.12	320.479
Spike #1278	-169.112	319.112															Spike #1278	142.138	155.537
Spike #1279	152.813	216.638															Spike #1279	126.611	386.132
Spike #1280	160.804	295.708															Spike #1280	89.7487	114.316
Spike #1281	271.161	-79.2712															Spike #1281	463.416	455.046
Spike #1282	197.024	182.589															Spike #1282	336.631	342.33
Spike #1283	218.847	137.065															Spike #1283	-118.667	286.519
Spike #1284	224.801	369.518															Spike #1284	257.501	181.678
Spike #1285	257.37	198.239															Spike #1285	368.962	209.352
Spike #1286	242.384	190.863															Spike #1286	-48.5006	457.124
Spike #1287	183.871	350.411															Spike #1287	108.601	409.022
Spike #1288	125.035	181.674															Spike #1288	526.78	159.469
Spike #1289	138.6	275.187															Spike #1289	268.588	185.4
Spike #1290	89.4578	290.425															Spike #1290	193.966	92.9702
Spike #1291	175.913	287.18															Spike #1291	490.457	339.268
Spike #1292	201.211	159.159															Spike #1292	417.931	401.384
Spike #1293	166.121	147.5															Spike #1293	53.5912	126.701
Spike #1294	-102.816	542.732															Spike #1294	526.978	1460.31
Spike #1295	344.054	286.19															Spike #1295	220.594	-202.833
Spike #1296	1166.08	341.824															Spike #1296	96.9026	238.024
Spike #1297	40.8598	220.365															Spike #1297	229.099	191.803
Spike #1298	133.231	233.313															Spike #1298	409.035	-104.672
Spike #1299	141.789	456.296															Spike #1299	240.902	208.34
Spike #1300	289.061	171.254															Spike #1300	194.571	301.302
Spike #1301	283.553	130.716															Spike #1301	200.663	244.796
Spike #1302	289.154	107.691															Spike #1302	268.226	283.23
Spike #1303	291.657	104.086															Spike #1303	-53.5891	186.712
Spike #1304	1510.4	480.222															Spike #1304	310.693	289.942
Spike #1305	52.5976	430.598															Spike #1305	195.392	376.274
Spike #1306	165.423	176.81															Spike #1306	215.9	172.225
Spike #1307	194.881	105.188															Spike #1307	242.459	262.138
Spike #1308	193.551	91.0404															Spike #1308	208.816	210.613
Spike #1309	192.962	90.3996															Spike #1309	56.2014	94.9177
Spike #1310	281.565	245.74															Spike #1310	77.5008	102.127
Spike #1311	40.0107	150.385															Spike #1311	362.953	410.941
Spike #1312	56.5064	-38.3111															Spike #1312	-73.5381	199.871
Spike #1313	293.44	200.446															Spike #1313	-115.499	182.201
Spike #1314	247.957	145.524															Spike #1314	25.6822	117.896
Spike #1315	446.501	174.908															Spike #1315	1141.94	693.176
Spike #1316	346.382	147.961															Spike #1316	273.281	151.365
Spike #1317	352.342	158.329															Spike #1317	629.334	279.794
Spike #1318	746.954	316.647															Spike #1318	129.564	401.054
Spike #1319	-460.358	422.671															Spike #1319	222.323	327.159
Spike #1320	84.3245	241.228															Spike #1320	-154.401	389.418
Spike #1321	345.739	270.1															Spike #1321	-222.551	360.139
Spike #1322	292.609	376.497															Spike #1322	165.07	308.135
Spike #1323	279.844	237.746															Spike #1323	202.541	37.6029
Spike #1324	318.359	272.268															Spike #1324	113.729	380.149
Spike #1325	396.889	185.775															Spike #1325	79.9623	131.074
Spike #1326	83.7741	48.865															Spike #1326	-55.6364	321.181
Spike #1327	79.0418	125.325															Spike #1327	249.812	319.084
Spike #1328	65.6988	155.627															Spike #1328	494.23	222.88
Spike #1329	78.9839	102.854															Spike #1329	688.626	1123.76
Spike #1330	71.9308	170.146															Spike #1330	875.886	535.078
Spike #1331	74.6044	190.628															Spike #1331	148.162	316.253
Spike #1332	163.971	86.6264															Spike #1332	202.533	268.337
Spike #1333	136.294	77.1666															Spike #1333	-70.2218	109.469
Spike #1334	491.287	466.206															Spike #1334	1340.48	481.458
Spike #1335	274.759	381.89															Spike #1335	281.191	198.458
Spike #1336	269.204	379.1															Spike #1336	252.968	32.5925
Spike #1337	272.029	366.944															Spike #1337	105.091	171.782
Spike #1338	118.706	183.132															Spike #1338	138.5	231.361
Spike #1339	262.376	224.338															Spike #1339	158.108	-46.3891
Spike #1340	207.022	137.163															Spike #1340	169.131	370.027
Spike #1341	183.714	117.092															Spike #1341	-143.121	254.097
Spike #1342	222.36	360.162															Spike #1342	-215.105	333.665
Spike #1343	100.799	286.656															Spike #1343	-94.7954	354.398
Spike #1344	285.406	184.3															Spike #1344	207.588	230.115
Spike #1345	255.74	199.254															Spike #1345	316.236	102.437
Spike #1346	190.896	211.17															Spike #1346	179.964	466.81
Spike #1347	184.213	200.146
Spike #1348	253.964	288.419
Spike #1349	-93.0407	198.287
Spike #1350	116.525	145.927
Spike #1351	321.122	126.735
Spike #1352	-13.9955	403.644
Spike #1353	109.618	164.128
Spike #1354	-261.799	320.191
Spike #1355	227.777	247.346
Spike #1356	139.078	134.316
Spike #1357	108.14	215.435
Spike #1358	375.275	277.494
Spike #1359	199.753	222.76
Spike #1360	187.235	240.921
Spike #1361	-13.0901	204.507
Spike #1362	35.2851	213.076
Spike #1363	273.812	228.707
Spike #1364	244.634	258.574
Spike #1365	427.806	244.107
Spike #1366	314.872	170.703
Spike #1367	263.198	36.8082
Spike #1368	213.694	180.575
Spike #1369	1122.58	275.2
Spike #1370	442.909	314.379
Spike #1371	328.54	404.007
Spike #1372	266.644	275.198
Spike #1373	194.711	162.339
Spike #1374	96.2158	182.798
Spike #1375	-0.480903	398.141
Spike #1376	175.815	202.642
Spike #1377	263.552	289.41
Spike #1378	280.793	407.242
Spike #1379	72.4426	189.228
Spike #1380	174.106	175.821
Spike #1381	202.132	172.466
Spike #1382	207.007	216.244
Spike #1383	355.037	-62.6784
Spike #1384	199.691	114.899
Spike #1385	147.054	64.8541
Spike #1386	115.945	61.9612
Spike #1387	288.855	322.677
Spike #1388	543.26	28.8215
Spike #1389	105.215	230.985
Spike #1390	-42.3101	355.994
Spike #1391	328.069	247.003
Spike #1392	-197.4	420.542
Spike #1393	-134.29	420.153
Spike #1394	179.82	-84.4691
Spike #1395	409.695	241.516
Spike #1396	291.079	254.002
Spike #1397	299.632	-169.63
Spike #1398	234.709	297.823
Spike #1399	187.833	305.191
Spike #1400	339.587	72.1174
Spike #1401	520.807	181.646
Spike #1402	228.785	247.395
Spike #1403	207.845	195.313
Spike #1404	236.089	257.335
Spike #1405	-12.7175	159.794
Spike #1406	155.958	165.972
Spike #1407	212.546	192.331
Spike #1408	74.5988	335.486
Spike #1409	72.4334	447.621
Spike #1410	84.5888	128.862
Spike #1411	162.328	364.577
Spike #1412	-106.12	255.081
Spike #1413	346.374	-253.335
Spike #1414	362.082	268.765
Spike #1415	162.223	458.208
Spike #1416	144.731	232.44
Spike #1417	381.754	150.311
Spike #1418	290.575	146.959
Spike #1419	222.514	87.541
Spike #1420	211.214	30.2062
Spike #1421	213.899	28.3107
Spike #1422	814.173	391.856
Spike #1423	1224.13	567.554
Spike #1424	1312.51	477.089
Spike #1425	167.592	47.9785
Spike #1426	-136.987	368.188
Spike #1427	-105.742	240.305
Spike #1428	55.9462	335.236
Spike #1429	236.148	9.63226
Spike #1430	187.937	49.6691
Spike #1431	48.2798	166.521
Spike #1432	173.155	156.955
Spike #1433	39.8716	285.337
Spike #1434	262.265	145.956
Spike #1435	262.143	156.849
Spike #1436	320.619	170.207
Spike #1437	302.951	223.969
Spike #1438	-371.951	313.146
Spike #1439	224.007	315.658
Spike #1440	149.131	479.494
Spike #1441	261.932	172.761
Spike #1442	-38.2053	317.246
Spike #1443	171.885	-81.1731
Spike #1444	-100.172	452.32
Spike #1445	-96.5557	433.287
Spike #1446	323.484	64.8219
Spike #1447	103.175	208.114
Spike #1448	117.752	318.835
Spike #1449	662.426	265.493
Spike #1450	361.556	-2.37085
Spike #1451	-181.417	705.251
Spike #1452	110.227	259.283
Spike #1453	-51.3701	392.556
Spike #1454	-2.48417	371.86
Spike #1455	54.8433	358.506
Spike #1456	411.834	292.548
Spike #1457	290.381	179.685
Spike #1458	207.554	252.677
Spike #1459	163.807	229.94
Spike #1460	187.2	168.888
Spike #1461	390.994	492.744
Spike #1462	404.706	493.245
Spike #1463	402.369	312.976
Spike #1464	158.978	161.905
Spike #1465	568.156	278.22
Spike #1466	320.785	531.77
Spike #1467	469.31	360.631
Spike #1468	614.323	411.381
Spike #1469	322.069	283.253
Spike #1470	-77.5944	247.628
Spike #1471	173.91	226.467
Spike #1472	181.719	47.8039
Spike #1473	597.653	320.599
Spike #1474	846.037	201.154
Spike #1475	523.298	201.333
Spike #1476	78.8311	611.018
Spike #1477	23.4013	238.319
Spike #1478	-225.882	430.249
Spike #1479	166.038	189.634
Spike #1480	226.763	146.274
Spike #1481	168.718	381.333
Spike #1482	160.923	491.753
Spike #1483	1352.79	704.616
Spike #1484	1437.6	651.979
Spike #1485	430.958	175.625
Spike #1486	210.971	150.602
Spike #1487	194.672	198.187
Spike #1488	461.397	272.471
Spike #1489	273.373	223.035
Spike #1490	376.742	211.265
Spike #1491	242.668	200.519
Spike #1492	217.908	241.46
Spike #1493	191.178	287.01
Spike #1494	157.275	232.406
Spike #1495	126.621	269.91
Spike #1496	112.292	296.696
Spike #1497	144.28	78.5664
Spike #1498	254.416	639.852
Spike #1499	140.932	432.742
Spike #1500	233.931	357.736
Spike #1501	270.235	337.611
Spike #1502	177.629	61.3767
Spike #1503	194.4	40.4916
Spike #1504	209.674	35.4566
Spike #1505	193.661	58.5744
Spike #1506	1202.8	279.567
Spike #1507	129.778	95.7301
Spike #1508	149.587	74.3126
Spike #1509	154.197	232.455
Spike #1510	358.063	216.456
Spike #1511	43.5794	373.036
Spike #1512	290.354	320.139
Spike #1513	377.451	-461.78
Spike #1514	353.111	-455.043
Spike #1515	316.309	-426.688
Spike #1516	212.425	510.239
Spike #1517	217.575	155.325
Spike #1518	218.651	129.939
Spike #1519	218.118	124.072
Spike #1520	215	116.185
Spike #1521	199.729	130.31
Spike #1522	170.465	161.208
Spike #1523	375.087	271.869
Spike #1524	375.309	275.173
Spike #1525	374.656	279.658
Spike #1526	353.501	326.683
Spike #1527	321.796	371.794
Spike #1528	294.135	404.632
Spike #1529	350.647	329.488
Spike #1530	337.335	335.394
Spike #1531	324.582	336.621
Spike #1532	317.852	335.351
Spike #1533	293.766	309.297
Spike #1534	280.712	224.35
Spike #1535	288.641	165.471
Spike #1536	307.352	115.596
Spike #1537	124.435	151.164
Spike #1538	157.668	169.381
Spike #1539	177.537	209.331
Spike #1540	179.489	237.166
Spike #1541	172.425	281.649
Spike #1542	160.329	319.544
Spike #1543	184.356	118.13
Spike #1544	202.77	97.4158
Spike #1545	207.404	94.2391
Spike #1546	217.114	90.229
Spike #1547	217.008	90.7313
Spike #1548	-216.897	415.909
Spike #1549	548.859	-211.47
Spike #1550	-169.108	328.651
Spike #1551	-178.845	310.292
Spike #1552	-183.905	291.556
Spike #1553	-59.9189	189.847
Spike #1554	133.567	242.584
Spike #1555	143.071	245.503
Spike #1556	166.647	253.343
Spike #1557	211.517	52.4743
Spike #1558	201.782	71.0525
Spike #1559	123.25	192.156
Spike #1560	77.6021	114.148
Spike #1561	30.7983	152.786
Spike #1562	-49.9833	235.622
Spike #1563	-41.609	248.058
Spike #1564	-20.5693	254.901
Spike #1565	-62.0505	107.909
Spike #1566	98.8594	123.086
Spike #1567	190.855	152.022
Spike #1568	186.982	172.643
Spike #1569	172.058	209.173
Spike #1570	140.987	261.25
Spike #1571	-51.7598	309.623
Spike #1572	-45.75	314.578
Spike #1573	119.759	-442.625
Spike #1574	497.935	283.762
Spike #1575	472.736	248.043
Spike #1576	148.532	417.078
Spike #1577	115.342	497.909
Spike #1578	429.272	-168.991
Spike #1579	149.376	17.8424
Spike #1580	144.235	37.6021
Spike #1581	120.999	74.6142
Spike #1582	97.3846	106.48
Spike #1583	40.8702	180.445
Spike #1584	156.361	181.17
Spike #1585	98.2633	265.378
Spike #1586	99.9054	275.452
Spike #1587	76.7557	340.28
Spike #1588	172.047	340.628
Spike #1589	254.944	339.402
Spike #1590	297.156	338.188
Spike #1591	326.339	336.121
Spike #1592	352.349	336.775
Spike #1593	287.181	322.239
Spike #1594	261.139	365.618
Spike #1595	301.92	355.824
Spike #1596	123.569	231.778
Spike #1597	136.413	237.508
Spike #1598	435.427	-265.708
Spike #1599	535.73	493.591
Spike #1600	552.088	480.137
Spike #1601	564.064	461.354
Spike #1602	344.666	280.362
Spike #1603	310.384	294.799
Spike #1604	284.497	304.949
Spike #1605	280.037	306.04
Spike #1606	235.005	-170.95
Spike #1607	236.993	-154.686
Spike #1608	-87.7544	306.163
Spike #1609	-171.674	454.394
Spike #1610	631.451	425.131
Spike #1611	610.202	403.274
Spike #1612	308.26	579.443
Spike #1613	326.093	286.545
Spike #1614	319.717	285.61
Spike #1615	295.972	265.094
Spike #1616	-69.3769	262.117
Spike #1617	34.2241	305.056
Spike #1618	58.2047	315.563
Spike #1619	99.7633	333.591
Spike #1620	120.454	341.867
Spike #1621	172.345	354.161
Spike #1622	226.563	347.074
Spike #1623	94.7632	363.886
Spike #1624	92.2004	380.105
Spike #1625	455.031	363.409
Spike #1626	410.369	365.43
Spike #1627	383.842	361.021
Spike #1628	176.568	175.689
Spike #1629	-160.939	134.736
Spike #1630	360.76	196.705
Spike #1631	350.489	182.972
Spike #1632	340.051	176.949
Spike #1633	74.9151	161.912
Spike #1634	91.3507	144.246
Spike #1635	97.8984	140.848
Spike #1636	119.859	132.838
Spike #1637	232.257	162.871
Spike #1638	221.545	175.319
Spike #1639	213.048	186.577
Spike #1640	209.411	191.73
Spike #1641	198.217	208.582
Spike #1642	179.302	240.127
Spike #1643	173.503	250.561
Spike #1644	168.01	260.884
Spike #1645	164.78	267.2
Spike #1646	154.398	289.686
Spike #1647	151.107	298.143
Spike #1648	145.94	318.078
Spike #1649	220.127	-80.1129
Spike #1650	133.908	-12.0113
Spike #1651	-24.9499	130.189
Spike #1652	440.275	359.336
Spike #1653	380.945	320.899
Spike #1654	361.854	329.409
Spike #1655	258.139	257.438
Spike #1656	258.246	258.406
Spike #1657	259.309	267.183
Spike #1658	183.286	178.804
Spike #1659	156.66	106.412
Spike #1660	277.802	249.731
Spike #1661	229.809	298.626
Spike #1662	397.139	329.851
Spike #1663	293.699	78.6324
Spike #1664	124.081	211.455
Spike #1665	309.493	199.061
Spike #1666	290.208	202.292
Spike #1667	262.496	208.277
Spike #1668	220.587	216.181
Spike #1669	213.329	215.762
Spike #1670	359.371	417.888
Spike #1671	171.454	111.058
Spike #1672	153.732	97.3965
Spike #1673	150.732	94.9727
Spike #1674	128.786	80.1855
Spike #1675	340.3	169.338
Spike #1676	307.144	154.869
Spike #1677	294.616	145.997
Spike #1678	273.041	135.512
Spike #1679	256.922	133.58
Spike #1680	243.57	134.994
Spike #1681	226.223	138.803
Spike #1682	178.997	145.003
Spike #1683	263.3	324.147
Spike #1684	258.433	351.309
Spike #1685	253.693	368.933
Spike #1686	251.575	384.443
Spike #1687	255.174	385.128
Spike #1688	261.006	383.859
Spike #1689	270.869	380.727
Spike #1690	61.3491	154.528
Spike #1691	275.104	178.15
Spike #1692	268.065	183.732
Spike #1693	240.246	211.564
Spike #1694	180.935	300.401
Spike #1695	523.479	372.891
Spike #1696	31.0138	316.612
Spike #1697	117.105	308.226
Spike #1698	193.757	296.273
Spike #1699	130.503	59.0745
Spike #1700	54.4618	141.27
Spike #1701	51.992	150.81
Spike #1702	52.7361	154.169
Spike #1703	56.0448	158.741
Spike #1704	82.0433	170.211
Spike #1705	95.2785	174.302
Spike #1706	103.332	177.069
Spike #1707	131.057	192.628
Spike #1708	877.75	1221.7
Spike #1709	848.631	1214.73
Spike #1710	833.112	1175.21
Spike #1711	41.3919	295.28
Spike #1712	62.8896	303.165
Spike #1713	137.803	327.151
Spike #1714	164.881	335.468
Spike #1715	192.942	344.438
Spike #1716	171.38	153.739
Spike #1717	109.263	189.328
Spike #1718	89.0012	200.545
Spike #1719	86.1661	202.175
Spike #1720	316.275	198.576
Spike #1721	283.393	142.562
Spike #1722	250.616	207.467
Spike #1723	227.244	211.459
Spike #1724	215.318	217.092
Spike #1725	208.87	224.104
Spike #1726	202.144	276.372
Spike #1727	208.265	127.708
Spike #1728	220.527	104.848
Spike #1729	235.032	21.4253
Spike #1730	224.61	5.2359
Spike #1731	184.742	35.0155
Spike #1732	502.957	257.379
Spike #1733	323.892	227.999
Spike #1734	322.474	221.369
Spike #1735	316.613	195.276
Spike #1736	305.206	190.475
Spike #1737	300.92	195.696
Spike #1738	278.962	224.321
Spike #1739	22.0886	68.6237
Spike #1740	268.706	209.116
Spike #1741	292.088	173.9
Spike #1742	227.678	243.213
Spike #1743	185.5	306.415
Spike #1744	307.068	239.213
Spike #1745	234.137	269.892
Spike #1746	132.883	191.398
Spike #1747	146.145	181.723
Spike #1748	188.513	154.851
Spike #1749	500.09	363.687
Spike #1750	472.678	341.661
Spike #1751	458.411	329.973
Spike #1752	471.307	291.8
Spike #1753	92.6272	181.341
Spike #1754	94.9694	183.819
Spike #1755	61.3444	103.332
Spike #1756	76.8866	100.684
Spike #1757	89.9953	91.3692
Spike #1758	96.1307	82.7294
Spike #1759	224.52	258.858
Spike #1760	216.218	246.362
Spike #1761	216.336	212.598
Spike #1762	220.3	191.574
Spike #1763	230.897	153.812
Spike #1764	248.638	108.953
Spike #1765	169.467	116.991
Spike #1766	166.671	106.039
Spike #1767	164.389	131.255
Spike #1768	161.328	144.942
Spike #1769	145.024	177.804
Spike #1770	156.063	176.728
Spike #1771	166.417	177.625
Spike #1772	188.156	190.283
Spike #1773	193.91	201.037
Spike #1774	196.927	221.55
Spike #1775	193.31	250.915
Spike #1776	189.177	267.216
Spike #1777	68.4802	191.04
Spike #1778	130.551	157.411
Spike #1779	171.086	34.6386
Spike #1780	180.203	5.42522
Spike #1781	-29.8007	242.523
Spike #1782	9.18501	236.718
Spike #1783	92.3937	224.452
Spike #1784	181.965	210.534
Spike #1785	218.343	206.485
Spike #1786	286.43	-147.717
Spike #1787	116.937	163.384
Spike #1788	117.756	169.323
Spike #1789	55.5067	6.22686
Spike #1790	64.9849	-28.2341
Spike #1791	75.8837	-49.9561
Spike #1792	84.9109	-57.0748
Spike #1793	88.0561	-46.6572
Spike #1794	84.2187	-23.1825
Spike #1795	59.8966	33.1658
Spike #1796	49.101	50.3643
Spike #1797	268.462	321.88
Spike #1798	264.501	322.898
Spike #1799	296.306	148.433
Spike #1800	267.815	81.8196
Spike #1801	216.765	80.4744
Spike #1802	263.078	209.256
Spike #1803	251.627	120.502
Spike #1804	219.922	141.465
Spike #1805	151.778	270.393
Spike #1806	134.598	298.274
Spike #1807	101.692	-11.2691
Spike #1808	105.97	34.6351
Spike #1809	85.3276	53.8294
Spike #1810	61.4934	74.571
Spike #1811	388.571	-42.6732
Spike #1812	-164.279	595.928
Spike #1813	255.241	136.094
Spike #1814	146.001	-40.7621
Spike #1815	117.908	-7.47592
Spike #1816	72.4071	53.5254
Spike #1817	34.7465	111.569
Spike #1818	-54.679	275.473
Spike #1819	214.319	420.277
Spike #1820	429.498	9.3624
Spike #1821	248.187	169.581
Spike #1822	223.05	178.44
Spike #1823	213.389	185.659
Spike #1824	202.527	196.656
Spike #1825	191.487	210.873
Spike #1826	179.87	228.374
Spike #1827	171.205	243.234
Spike #1828	104.141	147.458
Spike #1829	110.652	150.881
Spike #1830	123.457	160.226
Spike #1831	140.306	190.003
Spike #1832	136.853	212.705
Spike #1833	133.482	217.166
Spike #1834	131.7	217.29
Spike #1835	131.411	207.035
Spike #1836	148.369	157.094
Spike #1837	148.748	153.143
Spike #1838	247.78	52.1303
Spike #1839	265.967	18.4185
Spike #1840	166.327	109.246
Spike #1841	107.662	169.486
Spike #1842	24.9371	157.944
Spike #1843	94.7162	150.223
Spike #1844	124.367	156.196
Spike #1845	180.704	293.782
Spike #1846	112.309	77.5913
Spike #1847	109.059	82.4951
Spike #1848	105.273	119.91
Spike #1849	98.8106	183.837
Spike #1850	293.2	76.9084
Spike #1851	268.521	-10.6392
Spike #1852	153.556	69.2675
Spike #1853	393.538	301.354
Spike #1854	326.626	305.194
Spike #1855	200.75	-73.3124
Spike #1856	-36.4395	368.06
Spike #1857	122.474	156.121
Spike #1858	140.815	158.992
Spike #1859	148.593	147.178
Spike #1860	148.721	135.142
Spike #1861	227.72	239.461
Spike #1862	193.644	261.428
Spike #1863	170.22	284.947
Spike #1864	176.08	299.711
Spike #1865	-242.706	275.622
Spike #1866	182.711	344.644
Spike #1867	148.27	231.364
Spike #1868	232.776	235.204
Spike #1869	271.887	250.993
Spike #1870	281.583	268.772
Spike #1871	147.171	166.454
Spike #1872	137.657	175.378
Spike #1873	129.304	183.635
Spike #1874	122.949	190.014
Spike #1875	119.296	193.517
Spike #1876	115.352	196.269
Spike #1877	115.751	191.419
Spike #1878	119.033	182.82
Spike #1879	1249.81	424.105
Spike #1880	1245.99	420.369
Spike #1881	1234.36	414.915
Spike #1882	1166.32	407.289
Spike #1883	556.99	394.976
Spike #1884	460.886	373.537
Spike #1885	454.036	366.649
Spike #1886	149.598	202.329
Spike #1887	147.475	199.382
Spike #1888	147.165	191.832
Spike #1889	155.054	164.711
Spike #1890	163.181	144.534
Spike #1891	174.078	119.573
Spike #1892	186.254	94.4288
Spike #1893	349.913	183.201
Spike #1894	306.267	172.062
Spike #1895	252.893	170.564
Spike #1896	240.267	173.566
Spike #1897	217.98	184.189
Spike #1898	605.451	258.901
Spike #1899	577.17	225.474
Spike #1900	558.472	209.899
Spike #1901	542.087	203.373
Spike #1902	503.111	207.963
Spike #1903	486.346	214.856
Spike #1904	340.656	305.132
Spike #1905	84.895	74.9755
Spike #1906	89.8326	76.1687
Spike #1907	92.5687	79.0972
Spike #1908	95.2611	90.1306
Spike #1909	95.7007	100.482
Spike #1910	95.7706	116.505
Spike #1911	94.293	127.509
Spike #1912	92.5262	132.016
Spike #1913	85.0328	142.867
Spike #1914	143.996	144.059
Spike #1915	140.341	134.257
Spike #1916	133.969	106.043
Spike #1917	147.987	81.4369
Spike #1918	69.3659	-55.9908
Spike #1919	166.145	-50.0394
Spike #1920	-54.0333	105.802
Spike #1921	-60.216	120.131
Spike #1922	258.192	-22.4651
Spike #1923	177.752	40.8535
Spike #1924	104.512	102.719
Spike #1925	186.649	171.896
Spike #1926	181.444	179.624
Spike #1927	150.422	206.991
Spike #1928	262.875	32.085
Spike #1929	296.675	-23.6318
Spike #1930	4.59545	220.777
Spike #1931	-8.36962	245.621
Spike #1932	-16.1357	262.836
Spike #1933	-21.348	319.545
Spike #1934	93.4442	181.262
Spike #1935	75.9411	235.22
Spike #1936	281.441	233.332
Spike #1937	273.974	234.052
Spike #1938	261.46	235.843
Spike #1939	251.89	237.712
Spike #1940	65.0464	127.357
Spike #1941	-28.0604	187.256
Spike #1942	-19.9349	183.231
Spike #1943	49.8434	169.121
Spike #1944	93.0013	166.38
Spike #1945	134.284	140.065
Spike #1946	410.841	537.306
Spike #1947	451.405	530.913
Spike #1948	555.566	487.663
Spike #1949	122.609	280.303
Spike #1950	241.019	238.264
Spike #1951	254.102	195.231
Spike #1952	264.351	158.617
Spike #1953	293.852	41.915
Spike #1954	291.242	35.8359
Spike #1955	285.82	39.0667
Spike #1956	218.38	172.358
Spike #1957	238.589	123.698
Spike #1958	221.062	76.531
Spike #1959	234.965	37.7624
Spike #1960	241.039	-40.2849
Spike #1961	250.791	-111.23
Spike #1962	259.413	-145.114
Spike #1963	250.34	-132.018
Spike #1964	235.434	-110.614
Spike #1965	177.135	243.229
Spike #1966	177.536	234.25
Spike #1967	180.331	217.068
Spike #1968	255.26	-68.6332
Spike #1969	258.574	-80.4581
Spike #1970	342.715	216.069
Spike #1971	338.78	213.759
Spike #1972	325.965	210.333
Spike #1973	279.789	222.328
Spike #1974	252.364	411.658
Spike #1975	266.773	415.149
Spike #1976	198.069	74.048
Spike #1977	172.932	80.5077
Spike #1978	155.852	88.8934
Spike #1979	112.57	128.309
Spike #1980	163.149	136.51
Spike #1981	165.482	132.39
Spike #1982	143.031	218.175
Spike #1983	296.297	347.073
Spike #1984	320.179	346.652
Spike #1985	320.845	296.173
Spike #1986	125.131	45.0948
Spike #1987	-322.726	347.452
Spike #1988	-311.321	350.551
Spike #1989	-276.557	346.751
Spike #1990	-224.231	339.18
Spike #1991	-187.79	334.359
Spike #1992	211.845	196.1
Spike #1993	179.616	286.963
Spike #1994	168.231	322.866
Spike #1995	196.125	284.473
Spike #1996	283.227	138.356
[truncated: 6,915 more rows]
