# Supplementary material for: An inhibitory gate for state transition in cortex
Source: eLife. 2017 May 16;6:e26177. doi: 10.7554/eLife.26177 (PMC5444901; doi:10.7554/eLife.26177)
Supplement: Figure 3—figure supplement 1—source data 1. — DOI: http://dx.doi.org/10.7554/eLife.26177.016 [file elife-26177-fig3-figsupp1-data1.xlsx]

## Sheet: Sheet1
Figure 3 - Figure Supplement 1 - Source Data 1
Title:	Source data for the immunohistochemical analysis of ChR2 positive cells in PV-Cre and SST-Cre injected mice.
Number of cells positive for ChR2 and GABA protein in a PV-Cre mice (panel e)								Number of cells positive for ChR2 and PV protein in a PV-Cre mice (panel j)
Animal Number	Slice Number	ChR2	GABA	ChR2 & GABA				Animal Number	Slice Number	ChR2	PV	ChR2 & PV
Animal #1	Slice #1	12	17	11				Animal #1	Slice #1	8	10	8
Animal #1	Slice #2	13	26	12				Animal #1	Slice #2	11	14	9
Animal #1	Slice #3	10	16	7				Animal #1	Slice #3	12	22	12
Animal #2	Slice #1	7	22	7				Animal #2	Slice #1	15	15	14
Animal #2	Slice #2	12	19	5				Animal #2	Slice #2	16	13	10
Animal #2	Slice #3	10	23	8				Animal #2	Slice #3	12	13	12
Animal #3	Slice #1	14	20	8				Animal #3	Slice #1	14	14	14
Animal #3	Slice #2	7	9	6				Animal #3	Slice #2	9	10	6
Animal #3	Slice #3	9	15	7				Animal #3	Slice #3	11	18	7
Animal #4	Slice #1	5	14	1				Animal #4	Slice #1	13	14	13
Animal #4	Slice #2	8	18	7				Animal #4	Slice #2	14	15	9
Animal #4	Slice #3	9	13	4				Animal #4	Slice #3	4	6	4
Number of cells positive for ChR2 and GABA protein in a SST-Cre mice (panel o)								Number of cells positive for ChR2 and SST protein in a SST-Cre mice (panel t)
Animal Number	Slice Number	ChR2	GABA	ChR2 & GABA				Animal Number	Slice Number	ChR2	SST	ChR2 & PV
Animal #1	Slice #1	7	34	7				Animal #1	Slice #1	12	12	10
Animal #1	Slice #2	5	30	4				Animal #1	Slice #2	10	11	8
Animal #1	Slice #3	7	21	4				Animal #1	Slice #3	12	11	10
Animal #2	Slice #1	6	28	6				Animal #2	Slice #1	4	9	4
Animal #2	Slice #2	11	38	8				Animal #2	Slice #2	7	8	4
Animal #2	Slice #3	4	28	4				Animal #2	Slice #3	10	8	8
Animal #3	Slice #1	8	31	7				Animal #3	Slice #1	9	9	9
Animal #3	Slice #2	6	21	3				Animal #3	Slice #2	4	3	3
Animal #3	Slice #3	7	25	5				Animal #3	Slice #3	8	8	7
Animal #4	Slice #1	7	34	7				Animal #4	Slice #1	10	9	9
Animal #4	Slice #2	7	23	6				Animal #4	Slice #2	9	9	8
Animal #4	Slice #3	5	33	4				Animal #4	Slice #3	13	13	11
