# Supplementary material for: An inhibitory gate for state transition in cortex
Source: eLife. 2017 May 16;6:e26177. doi: 10.7554/eLife.26177 (PMC5444901; doi:10.7554/eLife.26177)
Supplement: Figure 3—figure supplement 2—source data 1. — DOI: http://dx.doi.org/10.7554/eLife.26177.018 [file elife-26177-fig3-figsupp2-data1.xlsx]

## Sheet: Sheet1
Figure 3 - Figure Supplement 2 - Source Data 1
Title:	Source data for the functional characterization of PV and SST interneurons expressing ChR2.
Number of APs fired from ChR2 positive PV interneurons during 10 ms blue light illumination at different laser power (panel e)
	18 mW	12 mW	4 mW	2 mW	0.3 mW
Cell #1	3.33		4	3	2.33
Cell #2	3	4	4	2	0
Cell #3	3	2.67	2	2	0
Cell #4	3	3	3	3	2
Cell #5	1	1	1	1.33	2
ChR2-mediated current recorded from ChR2 positive PV interneurons evoked by 10 ms blue light illumination at different laser power (panel g)
	18 mW	12 mW	4 mW	2 mW	0.3 mW
Cell #1	-156.7	-155	-122	-87.9	-9.816
Cell #2	-132.05	-136.2	-97.4	-81.01	-29.73
Cell #3	-174.58	-151.5	-131	-121.5	-102
Number of APs fired from ChR2 positive SST interneurons during 10 ms blue light illumination at different laser power (panel l)
	18 mW	12 mW	7mW	4 mW	2 mW	0.3 mW
Cell #1	3	3	3	3	3	3
Cell #2	4	5	5	5	5	3
Cell #3	1.33	1	1	1	1	1
Cell #4	0	0	0	0	0	0
Cell #5	3	3	3	3	3	2
Cell #6	2	2	2	2	2	0
Cell #7	3	3	3	3	2	1
Cell #8	6	7	7	7	7	3
Cell #9	1.33	1	1.33	2
ChR2-mediated current recorded from ChR2 positive PV interneurons evoked by 10 ms blue light illumination at different laser power (panel n)
	18 mW	12 mW	7mW	4 mW	2 mW	0.3 mW
Cell #1	-275.655	-270.463	-271.224	-273.774	-274.234	-148.623
Cell #2	-41.9655	-40.5105	-39.2103	-37.3012	-33.2256	-14.7702
Cell #3	-224.905	-219.221	-216.428	-213.635	-208.751	-154.528
Cell #4	-87.6377	-79.322	-78.4032	-71.7745	-68.5132	-35.9637
Cell #5	-128.831	-121.334	-119.821	-114.754	-105.951	-57.7523
