# Supplementary material for: An inhibitory gate for state transition in cortex
Source: eLife. 2017 May 16;6:e26177. doi: 10.7554/eLife.26177 (PMC5444901; doi:10.7554/eLife.26177)
Supplement: Figure 3—figure supplement 3—source data 1. — DOI: http://dx.doi.org/10.7554/eLife.26177.020 [file elife-26177-fig3-figsupp3-data1.xlsx]

## Sheet: Sheet1
Figure 3 - Figure Supplement 3 - Source Data 1
Title:	Source data for the analysis of membrane potential speed during optogenetically-evoked and spontaneous up-to-down state transitions.
Membrane potential speed for optogenetically evoked and spontaneous up-to-down transitions during optogenetic manipulation of PV cells (panel c)
Cell #	Evoked	Spontaneous
Cell #1	-0.70011	-0.1473
Cell #2	-0.49416	-0.15826
Cell #3	-0.12354	-0.16539
Cell #4	-0.21146	-0.1346
Cell #5	-0.72264	-0.17228
Cell #6	-0.39264	-0.0901
Cell #7	-1.24712	-0.30232
Cell #8	-1.21874	-0.28923
Cell #9	-1.19014	-0.25972
Cell #10	-0.19092	-0.47682
Cell #11	-0.68529	-0.19714
Cell #12	-0.69632	-0.18918
Membrane potential velocity for optogenetically evoked and spontaneous up-to-down transitions during optogenetic manipulation of SST cells (panel f)
Cell #	Evoked	Spontaneous
Cell #1	-0.63147	-0.31957
Cell #2	-0.31899	-0.18615
Cell #3	-0.72786	-0.268
Cell #4	-0.60451	-0.3873
Cell #5	-0.93256	-0.14004
Cell #6	-1.17066	-0.19676
Cell #7	-0.94804	-0.27058
Cell #8	-1.02192	-0.36028
Cell #9	-0.76127	-0.27357
