# Supplementary material for: An inhibitory gate for state transition in cortex
Source: eLife. 2017 May 16;6:e26177. doi: 10.7554/eLife.26177 (PMC5444901; doi:10.7554/eLife.26177)
Supplement: Figure 3—figure supplement 4—source data 1. — DOI: http://dx.doi.org/10.7554/eLife.26177.022 [file elife-26177-fig3-figsupp4-data1.xlsx]

## Sheet: Sheet1
Figure 3 - Figure Supplement 4 - Source Data 1
Title:	Source data for the effect of PV photoactivation during up states on network activity.
Effect on Gamma Low frequency band (30-60 Hz) evaluated from the LFP signal in the pre (100 ms) or post (100 ms) stimulus window (Panel b)
Animal Number	Pre	Post
Animal #1	0.051	0.05
Animal #2	0.052	0.008
Animal #3	0.085	0.011
Animal #4	0.009	0.001
Animal #5	0.021	0.009
Animal #6	0.069	0.048
Animal #7	0.036	0.012
Animal #8	0.03	0.005
Animal #9	0.056	0.006
Animal #10	0.008	0.004
Animal #11	0.027	0.007
Animal #12	0.018	0.002
Animal #13	0.037	0.051
Effect on Gamma High frequency band (60-90 Hz) evaluated from the LFP signal in the pre (100 ms) or post (100 ms) stimulus window (Panel c)
Animal Number	Pre	Post
Animal #1	0.02041	0.00272
Animal #2	0.00379	0.00041
Animal #3	0.01158	0.00087
Animal #4	0.00045	0.0001
Animal #5	0.00122	0.00037
Animal #6	0.02328	0.00425
Animal #7	0.00383	0.00071
Animal #8	0.00376	0.00029
Animal #9	0.00276	0.00027
Animal #10	0.00029	0.00017
Animal #11	0.00279	0.00052
Animal #12	0.00149	7e-05
Animal #13	0.00637	0.00251
Effect on Spike Frequency evaluated from the MU signal in the pre (100 ms) or post (100 ms) stimulus window (Panel e)
Animal Number	Pre	Post
Animal #1	139	9
Animal #2	68.89	4.44
Animal #3	104	2
Animal #4	13.33	0
Animal #5	27.5	5
Animal #6	56	4
Animal #7	31	0
Animal #8	109	0
Animal #9	57.78	0
Animal #10	28.33	0
Animal #11	51	1
Animal #12	20	0
Animal #13	80	0
