# Supplementary material for: An inhibitory gate for state transition in cortex
Source: eLife. 2017 May 16;6:e26177. doi: 10.7554/eLife.26177 (PMC5444901; doi:10.7554/eLife.26177)
Supplement: Figure 3—figure supplement 4—source data 2. — DOI: http://dx.doi.org/10.7554/eLife.26177.023 [file elife-26177-fig3-figsupp4-data2.xlsx]

## Sheet: Sheet1
Figure 3 - Figure Supplement 4 - Source Data 2
Title:	Source data for the effect of PV photoactivation during down states on network activity.
Effect on Gamma Low frequency band (30-60 Hz) evaluated from the LFP signal in the pre (100 ms) or post (100 ms) stimulus window (Panel g)
Animal Number	Pre	Post
Animal #1	0.0051	0.0052
Animal #2	0.035	0.0479
Animal #3	0.0238	0.0324
Animal #4	0.0111	0.0282
Animal #5	0.0049	0.0069
Animal #6	0.0049	0.0053
Animal #7	0.0086	0.0079
Animal #8	0.0171	0.0257
Animal #9	0.0054	0.0121
Animal #10	0.0757	0.2873
Animal #11	0.0041	0.003
Animal #12	0.0598	0.112
Animal #13	0.0484	0.2767
Effect on Gamma High frequency band (60-90 Hz) evaluated from the LFP signal in the pre (100 ms) or post (100 ms) stimulus window (Panel h)
Animal Number	Pre	Post
Animal #1	0.0004	0.0004
Animal #2	0.0114	0.0063
Animal #3	0.0077	0.012
Animal #4	0.0035	0.0046
Animal #5	0.0003	0.0003
Animal #6	0.0004	0.0005
Animal #7	0.0006	0.0011
Animal #8	0.0011	0.0021
Animal #9	0.0005	0.0015
Animal #10	0.0152	0.0241
Animal #11	0.0001	0.0001
Animal #12	0.0144	0.0218
Animal #13	0.0196	0.0238
Effect on Spike Frequency evaluated from the MU signal in the pre (100 ms) or post (100 ms) stimulus window (Panel j)
Animal Number	Pre	Post
Animal #1	0	0
Animal #2	0	2
Animal #3	0	0
Animal #4	0	0
Animal #5	0	0
Animal #6	0	0
Animal #7	0	0
Animal #8	0	0
Animal #9	0	0
Animal #10	0	0
Animal #11	0	0
Animal #12	0	0
Animal #13	0	0
