# Supplementary material for: An inhibitory gate for state transition in cortex
Source: eLife. 2017 May 16;6:e26177. doi: 10.7554/eLife.26177 (PMC5444901; doi:10.7554/eLife.26177)
Supplement: Figure 3—figure supplement 5—source data 1. — DOI: http://dx.doi.org/10.7554/eLife.26177.025 [file elife-26177-fig3-figsupp5-data1.xlsx]

## Sheet: Sheet1
Figure 3 - Figure Supplement 5 - Source Data 1
Title:	Source data for the effect of SST photoactivation during up states on network activity.
Effect on Gamma Low frequency band (30-60 Hz) evaluated from the LFP signal in the pre (100 ms) or post (100 ms) stimulus window (Panel b)
Animal Number	Pre	Post
Animal #1	0.015	0.005
Animal #2	0.007	0.001
Animal #3	0.033	0.003
Animal #4	0.047	0.007
Animal #5	0.011	0.003
Animal #6	0.032	0.006
Animal #7	0.024	0.005
Animal #8	0.031	0.006
Animal #9	0.03	0.034
Animal #10	0.073	0.005
Effect on Gamma High frequency band (60-90 Hz) evaluated from the LFP signal in the pre (100 ms) or post (100 ms) stimulus window (Panel c)
Animal Number	Pre	Post
Animal #1	0.003	0
Animal #2	0	0
Animal #3	0.009	0
Animal #4	0.004	0
Animal #5	0.002	0
Animal #6	0.005	0
Animal #7	0.004	0
Animal #8	0.005	0.001
Animal #9	0.015	0.001
Animal #10	0.006	0.001
Effect on Spike Frequency evaluated from the MU signal in the pre (100 ms) or post (100 ms) stimulus window (Panel e)
Animal Number	Pre	Post
Animal #1	115	0
Animal #2	74	0
Animal #3	95	12
Animal #4	167	50
Animal #5	268	2
Animal #6	207	6
Animal #7	175	30
Animal #8	380	53
Animal #9	63	0
Animal #10	102	0
