# Supplementary material for: An inhibitory gate for state transition in cortex
Source: eLife. 2017 May 16;6:e26177. doi: 10.7554/eLife.26177 (PMC5444901; doi:10.7554/eLife.26177)
Supplement: Figure 3—figure supplement 5—source data 2. — DOI: http://dx.doi.org/10.7554/eLife.26177.026 [file elife-26177-fig3-figsupp5-data2.xlsx]

## Sheet: Sheet1
Figure 3 - Figure Supplement 5 - Source Data 2
Title:	Source data for the effect of SST photoactivation during down states on network activity.
Effect on Gamma Low frequency band (30-60 Hz) evaluated from the LFP signal in the pre (100 ms) or post (100 ms) stimulus window (Panel g)
Animal Number	Pre	Post
Animal #1	0.005	0.007
Animal #2	0.013	0.088
Animal #3	0.019	0.027
Animal #4	0.009	0.095
Animal #5	0.004	0.004
Animal #6	0.01	0.093
Animal #7	0.037	0.085
Animal #8	0.024	0.623
Animal #9	0.004	0.003
Animal #10	0.005	0.009
Effect on Gamma High frequency band (60-90 Hz) evaluated from the LFP signal in the pre (100 ms) or post (100 ms) stimulus window (Panel h)
Animal Number	Pre	Post
Animal #1	0	0
Animal #2	0.003	0.004
Animal #3	0.007	0.003
Animal #4	0.001	0.022
Animal #5	0	0
Animal #6	0.002	0.005
Animal #7	0.01	0.004
Animal #8	0.005	0.071
Animal #9	0	0
Animal #10	0	0
Effect on Spike Frequency evaluated from the MU signal in the pre (100 ms) or post (100 ms) stimulus window (Panel j)
Animal Number	Pre	Post
Animal #1	0	0
Animal #2	0	0
Animal #3	0	6.67
Animal #4	0	44.44
Animal #5	0	0
Animal #6	0	0
Animal #7	0	38
Animal #8	0	90
Animal #9	0	0
Animal #10	0	0
