# Supplementary material for: An inhibitory gate for state transition in cortex
Source: eLife. 2017 May 16;6:e26177. doi: 10.7554/eLife.26177 (PMC5444901; doi:10.7554/eLife.26177)
Supplement: Figure 3—source data 1. — DOI: http://dx.doi.org/10.7554/eLife.26177.014 [file elife-26177-fig3-data1.xlsx]

## Sheet: Sheet1
Figure 3 - Source Data 1
Title:	Source data for the analysis of membrane potential changes during photostimulation of PV or SST interneurons.
PV activation during ongoing Up state in anesthetized mice (Panel c, left)							PV activation during ongoing Up state in non-anesthetized mice (Panel c, right)
Cell Number	Pre	Post					Cell Number	Pre	Post
Cell #1	22.6155	0.84356					Cell #1	14.9675	3.54677
Cell #2	12.9169	-0.61925					Cell #2	18.0991	1.72415
Cell #3	23.4039	6.81958					Cell #3	16.2917	1.66394
Cell #4	22.4049	8.02304					Cell #4	9.26389	2.6428
Cell #5	16.4085	1.76172					Cell #5	20.7691	4.74766
Cell #6	14.8896	5.82366					Cell #6	24.4427	6.18258
Cell #7	24.8986	10.5535
Cell #8	19.8641	9.89265
Cell #9	16.0448	4.28083
Cell #10	10.5427	2.68694
Cell #11	23.79	7.32802
Cell #12	21.5495	7.8618
PV activation during ongoing Down state in anesthetized mice (Panel e, left)							PV activation during ongoing Down state in non-anesthetized mice (Panel e, right)
Cell Number	Pre	Post					Cell Number	Pre	Post
Cell #1	0.00348	-0.00297					Cell #1	0.943684	0.108538
Cell #2	0.15429	-3.07835					Cell #2	0.136628	-1.00765
Cell #3	-0.37202	0.82642					Cell #3	-1.05271	-1.95713
Cell #4	0.02855	5.3972					Cell #4	0.414917	-0.285181
Cell #5	-0.45097	-1.85297					Cell #5	-0.636017	-0.719593
Cell #6	0.5629	0.62957					Cell #6	0.832586	1.20584
Cell #7	-0.13173	0.27589
Cell #8	-0.29668	-0.40408
Cell #9	0.63534	0.84235
Cell #10	0.25952	-1.48977
Cell #11	0.89358	2.48318
Cell #12	0.26887	3.24221
SST activation during ongoing Up state in anesthetized mice (Panel h, left)							SST activation during ongoing Up state in non-anesthetized mice (Panel h, right)
Cell Number	Pre	Post					Cell Number	Pre	Post
Cell #1	19.8774	4.08866					Cell #1	13.7618	2.27314
Cell #2	16.4783	1.52294					Cell #2	20.6595	4.14522
Cell #3	22.6858	7.44854					Cell #3	18.1915	5.07338
Cell #4	27.6776	7.75665					Cell #4	14.968	0.606553
Cell #5	22.6718	5.14689					Cell #5	15.1827	-1.89168
Cell #6	20.1849	6.04158					Cell #6	15.1743	-1.76023
Cell #7	21.3204	7.95442
Cell #8	22.1464	7.80454
Cell #9	20.1044	5.01834
SST activation during ongoing Down state in anesthetized mice (Panel j, left)							SST activation during ongoing Down state in non-anesthetized mice (Panel j, right)
Cell Number	Pre	Post					Cell Number	Pre	Post
Cell #1	-1.20418	-1.11893					Cell #1	0.202197	0.22921
Cell #2	-0.24395	-2.50131					Cell #2	0.649669	0.523332
Cell #3	0.11342	2.10058					Cell #3	1.49162	2.0053
Cell #4	-0.5372	0.34457					Cell #4	1.12215	-0.434061
Cell #5	0.11669	0.26421					Cell #5	0.116578	-0.805222
Cell #6	-0.06806	0.5211					Cell #6	0.597241	-1.21767
Cell #7	0.90841	2.06086
Cell #8	-0.26422	1.42754
Cell #9	0.39441	1.06176
