# Supplementary material for: An inhibitory gate for state transition in cortex
Source: eLife. 2017 May 16;6:e26177. doi: 10.7554/eLife.26177 (PMC5444901; doi:10.7554/eLife.26177)
Supplement: Figure 4—figure supplement 1—source data 1. — DOI: http://dx.doi.org/10.7554/eLife.26177.031 [file elife-26177-fig4-figsupp1-data1.xlsx]

## Sheet: Sheet1
Figure 4 - Figure Supplement 1 -Source Data 1
Title:	Source data for functional characterization of PV and SST interneurons expressing Arch.
Effect on PV interneurons (panel e)							Effect on SST interneurons (panel j)
Cell Number	Pre	Light	Post				Cell Number	Pre	Light	Post
Cell #1	85.7143	0	34.2857				Cell #1	45.7143	0	37.1429
Cell #2	74.2857	0	65.7143				Cell #2	20	0	22.8571
Cell #3	65.7143	0	48.5714				Cell #3	37.1429	0	20
Cell #4	51.4286	0	34.2857				Cell #4	28.5714	0	8.57143
Cell #5	62.8571	0	11.4286				Cell #5	28.5714	0	25.7143
Cell #6	94.2857	0	94.2857				Cell #6	28.5714	0	37.1429
Cell #7	68.5714	0	54.2857				Cell #7	31.4286	0	17.1429
Cell #8	71.4286	0	77.1429				Cell #8	68.5714	0	65.7143
Cell #9	85.7143	0	65.7143				Cell #9	17.1429	0	8.57143
Cell #10	57.1429	0	48.5714				Cell #10	25.7143	0	28.5714
Cell #11	88.5714	0	68.5714				Cell #11	40	0	20
Cell #12	80	0	54.2857				Cell #12	34.2857	0	17.1429
Cell #13	65.7143	0	48.5714				Cell #13	51.4286	0	17.1429
