# Supplementary material for: An inhibitory gate for state transition in cortex
Source: eLife. 2017 May 16;6:e26177. doi: 10.7554/eLife.26177 (PMC5444901; doi:10.7554/eLife.26177)
Supplement: Figure 4—figure supplement 3—source data 1. — DOI: http://dx.doi.org/10.7554/eLife.26177.034 [file elife-26177-fig4-figsupp3-data1.xlsx]

## Sheet: Sheet1
Figure 4 - Figure Supplement 3 - Source Data 1
Title:	Source data for the effect of PV photoinhibition during up states on network activity.
Effect on Gamma Low frequency band (30-60 Hz) evaluated from the LFP signal in the pre (100 ms), light (500 ms) or post (100 ms) stimulus window (Panel b)
Animal Number	Pre	Light	Post
Animal #1	0.024706	0.544637	0.0352904
Animal #2	0.0358868	0.73915	0.0136956
Animal #3	0.0066342	0.00888086	0.00140997
Animal #4	0.0130247	0.0459405	0.0014765
Animal #5	0.0485096	0.0349977	0.00317466
Animal #6	0.0216411	0.0923831	0.00942805
Animal #7	0.0275483	0.265497	0.0259416
Animal #8	0.013259	0.0921933	0.00927376
Animal #9	0.00949963	0.0539726	0.00494349
Animal #10	0.0124875	0.0281712	0.00371894
Animal #11	0.0418093	0.605958	0.0446174
Animal #12	0.0679614	0.320658	0.0134234
Animal #13	0.120162	0.442444	0.08651
Animal #14	0.0610108	0.0835682	0.0329386
Animal #15	0.0874137	0.668592	0.0470493
Animal #16	0.177268	1.17586	0.0242162
Animal #17	0.100666	0.36464	0.0183933
Animal #18	0.0181089	0.0419351	0.00673551
Animal #19	0.0386524	0.14865	0.0118844
Effect on Gamma High frequency band (60-90 Hz) evaluated from the LFP signal in the pre (100 ms), Light (500 ms) or post (100 ms) stimulus window (Panel c)
Animal Number	Pre	Light	Post
Animal #1	0.0028332	0.0793708	0.00349886
Animal #2	0.00462695	0.144029	0.00166674
Animal #3	0.000383225	0.000959309	0.000108886
Animal #4	0.00138708	0.00588233	0.000159614
Animal #5	0.00342693	0.00433572	0.000191108
Animal #6	0.00485358	0.0168189	0.00133089
Animal #7	0.00617764	0.0471955	0.000866905
Animal #8	0.00315727	0.0118149	0.000532102
Animal #9	0.00181259	0.00880029	0.00022026
Animal #10	0.00107437	0.00398455	0.000290331
Animal #11	0.0101679	0.083259	0.00479554
Animal #12	0.00815614	0.0771048	0.000945735
Animal #13	0.0221451	0.0768798	0.0120211
Animal #14	0.00698989	0.0151356	0.00478871
Animal #15	0.0181491	0.145117	0.00465631
Animal #16	0.0268739	0.28679	0.00203004
Animal #17	0.0291423	0.115277	0.00181009
Animal #18	0.00211015	0.00621796	0.000577459
Animal #19	0.00432036	0.0188084	0.000573166
Effect on Spike Frequency evaluated from the MU signal in the pre (100 ms), Light (500 ms) or post (100 ms) stimulus window (Panel e)
Animal Number	Pre	Light	Post
Animal #1	140	176.4	103
Animal #2	133	237.8	48
Animal #3	24.2857	56.8571	11.4286
Animal #4	48.3333	54.6667	0
Animal #5	55.5556	46.4444	15.5556
Animal #6	134	245.51	16
Animal #7	145	311.02	5
Animal #8	159	400.408	31
Animal #9	76	196.327	0
Animal #10	135.455	195.362	20
Animal #11	80	201.429	47
Animal #12	105	205	22
Animal #13	177	209.4	44
Animal #14	70	147.333	55.5556
Animal #15	38	103.4	34
Animal #16	118.333	211.333	30
Animal #17	239	254	18
Animal #18	40	85.8	20
Animal #19	48	92.2	22
