# Supplementary material for: An inhibitory gate for state transition in cortex
Source: eLife. 2017 May 16;6:e26177. doi: 10.7554/eLife.26177 (PMC5444901; doi:10.7554/eLife.26177)
Supplement: Figure 4—figure supplement 3—source data 2. — DOI: http://dx.doi.org/10.7554/eLife.26177.035 [file elife-26177-fig4-figsupp3-data2.xlsx]

## Sheet: Sheet1
Figure 4 - Figure Supplement 3 - Source Data 2
Title:	Source data for the effect of PV photoinhibition during down states on network activity.
Effect on Gamma Low frequency band (30-60 Hz) evaluated from the LFP signal in the pre (100 ms), light (500 ms) or post (100 ms) stimulus window (Panel g)
Animal Number	Pre	Light	Post
Animal #1	0.0556961	53.7941	0.527343
Animal #2	0.0088823	6.7287	0.137005
Animal #3	0.0119691	0.793057	0.0709006
Animal #4	0.0093473	4.56229	0.42706
Animal #5	0.00589019	1.23525	0.0702606
Animal #6	0.00621241	0.170221	0.0559328
Animal #7	0.00651723	0.507252	0.022309
Animal #8	0.0359304	0.466143	0.153121
Animal #9	0.00745202	0.215321	0.0203445
Animal #10	0.01931	3.86122	0.432906
Animal #11	0.00535556	0.187181	0.0292494
Animal #12	0.00597762	2.11932	0.286815
Animal #13	0.00853214	1.4283	0.451921
Animal #14	0.0585816	15.6962	6.13187
Animal #15	0.0171239	4.72651	0.922851
Animal #16	0.0170541	11.023	1.47879
Animal #17	0.0124188	12.191	1.69355
Animal #18	0.0167452	0.316382	1.85604
Animal #19	0.00808328	1.46603	0.464602
Effect on Gamma High frequency band (60-90 Hz) evaluated from the LFP signal in the pre (100 ms), Light (500 ms) or post (100 ms) stimulus window (Panel h)
Animal Number	Pre	Light	Post
Animal #1	0.0170022	5.15812	0.0436022
Animal #2	0.00136883	1.24768	0.0249382
Animal #3	0.00219575	0.0822277	0.00442454
Animal #4	0.0018777	0.712207	0.05977
Animal #5	0.000708814	0.112165	0.00292556
Animal #6	0.000700635	0.0270362	0.00734822
Animal #7	0.000656475	0.0587506	0.000897556
Animal #8	0.00403156	0.0519526	0.0102134
Animal #9	0.000586852	0.0384493	0.00157198
Animal #10	0.00459597	0.247809	0.0465297
Animal #11	0.000523904	0.0260925	0.00241496
Animal #12	0.000665553	0.539683	0.0262542
Animal #13	0.00132295	0.261131	0.0531678
Animal #14	0.0180188	2.21422	1.19695
Animal #15	0.00237849	0.95485	0.155458
Animal #16	0.00246415	2.72872	0.171586
Animal #17	0.00273276	4.23903	0.23768
Animal #18	0.00399812	0.104862	0.116329
Animal #19	0.0013997	0.17373	0.0246931
Effect on Spike Frequency evaluated from the MU signal in the pre (100 ms), Light (500 ms) or post (100 ms) stimulus window (Panel j)
Animal Number	Pre	Light	Post
Animal #1	0	44.2222	11.1111
Animal #2	0	207.6	43
Animal #3	0	68.2	1
Animal #4	0	58.2	11
Animal #5	0	40.8	13
Animal #6	0	156.122	40
Animal #7	0	327.143	9
Animal #8	0	236.735	68
Animal #9	0	178.776	7
Animal #10	0	182.857	35
Animal #11	0	205.306	64
Animal #12	0	223.6	39
Animal #13	0	150	107
Animal #14	0	118	152
Animal #15	0	86.2222	36.6667
Animal #16	0	145	88
Animal #17	0	293.4	115
Animal #18	0	33.8	32
Animal #19	0	60.8	61
