# Supplementary material for: An inhibitory gate for state transition in cortex
Source: eLife. 2017 May 16;6:e26177. doi: 10.7554/eLife.26177 (PMC5444901; doi:10.7554/eLife.26177)
Supplement: Figure 4—figure supplement 4—source data 1. — DOI: http://dx.doi.org/10.7554/eLife.26177.037 [file elife-26177-fig4-figsupp4-data1.xlsx]

## Sheet: Sheet1
Figure 4 - Figure Supplement 4 - Source Data 1
Title:	Source data for the effect of SST photoinhibition during up states on network activity.
Effect on Gamma Low frequency band (30-60 Hz) evaluated from the LFP signal in the pre (100 ms), light (500 ms) or post (100 ms) stimulus window (Panel b)
Animal Number	Pre	Light	Post
Animal #1	0.0530554	0.0312491	0.0218479
Animal #2	0.0301768	0.111017	0.0296698
Animal #3	0.075263	0.153079	0.014775
Animal #4	0.0332146	0.0762147	0.0287774
Animal #5	0.0893896	0.137106	0.0420138
Animal #6	0.0344186	0.0416994	0.0299024
Animal #7	0.0273964	0.0469867	0.00259888
Animal #8	0.0405024	0.240321	0.01813
Animal #9	0.0361841	0.0222862	0.0157257
Animal #10	0.0283758	0.03721	0.0179272
Animal #11	0.0376627	0.0464353	0.0278205
Animal #12	0.0187052	0.0408475	0.0115181
Animal #13	0.0441803	0.0649706	0.00680783
Animal #14	0.0686329	0.0756833	0.0315028
Animal #15	0.0298411	0.0732351	0.0241999
Animal #16	0.0938497	0.304042	0.0223199
Animal #17	0.0917956	0.253909	0.0223097
Animal #18	0.0762207	0.173377	0.102895
Effect on Gamma High frequency band (60-90 Hz) evaluated from the LFP signal in the pre (100 ms), Light (500 ms) or post (100 ms) stimulus window (Panel c)
Animal Number	Pre	Light	Post
Animal #1	0.00301211	0.002649	0.00218004
Animal #2	0.00336408	0.0186258	0.000919404
Animal #3	0.0161164	0.0244073	0.00428213
Animal #4	0.00850268	0.0223079	0.00672002
Animal #5	0.0173856	0.0205298	0.00667348
Animal #6	0.00469803	0.00615582	0.00510944
Animal #7	0.00435685	0.0111516	0.000268038
Animal #8	0.00525002	0.0446641	0.00281516
Animal #9	0.014959	0.00916476	0.00215376
Animal #10	0.00392845	0.00585356	0.00130839
Animal #11	0.00428266	0.00743754	0.00184977
Animal #12	0.00344242	0.00786847	0.000929002
Animal #13	0.0137312	0.00695274	0.000544368
Animal #14	0.00895548	0.00958162	0.00345696
Animal #15	0.00485416	0.0105893	0.00151447
Animal #16	0.0256927	0.0331579	0.00254181
Animal #17	0.0203728	0.0452031	0.00237314
Animal #18	0.0115034	0.0346209	0.0404368
Effect on Spike Frequency evaluated from the MU signal in the pre (100 ms), Light (500 ms) or post (100 ms) stimulus window (Panel e)
Animal Number	Pre	Light	Post
Animal #1	66	28.4	16
Animal #2	148	263.6	51
Animal #3	212	301.2	76
Animal #4	114	228.6	98
Animal #5	94	114.4	34
Animal #6	157	82.4	88
Animal #7	23.75	28.5	0
Animal #8	43	166.4	19
Animal #9	250	184.444	35.5556
Animal #10	157	101	21
Animal #11	69	145.2	28
Animal #12	127.778	171.333	27.7778
Animal #13	91	92	6
Animal #14	62	78.8	21
Animal #15	171.429	107.429	35.7143
Animal #16	110	139	22.5
Animal #17	65	78.25	3.75
Animal #18	55.5556	46.4444	30
