# Supplementary material for: An inhibitory gate for state transition in cortex
Source: eLife. 2017 May 16;6:e26177. doi: 10.7554/eLife.26177 (PMC5444901; doi:10.7554/eLife.26177)
Supplement: Figure 4—figure supplement 4—source data 2. — DOI: http://dx.doi.org/10.7554/eLife.26177.038 [file elife-26177-fig4-figsupp4-data2.xlsx]

## Sheet: Sheet1
Figure 4 - Figure Supplement 4 - Source Data 2
Title:	Source data for the effect of SST photoinhibition during down states on network activity.
Effect on Gamma Low frequency band (30-60 Hz) evaluated from the LFP signal in the pre (100 ms), light (500 ms) or post (100 ms) stimulus window (Panel g)
Animal Number	Pre	Light	Post
Animal #1	0.0139694	1.0372	0.389793
Animal #2	0.00633419	0.852158	0.375633
Animal #3	0.0238901	0.831246	0.24276
Animal #4	0.00853697	0.35061	0.533273
Animal #5	0.0171113	2.49534	1.52361
Animal #6	0.00779639	0.0714235	0.149975
Animal #7	0.0143901	0.67345	0.38111
Animal #8	0.0356949	9.68373	12.5949
Animal #9	0.0136538	0.0527558	0.377649
Animal #10	0.0176447	0.24746	1.32902
Animal #11	0.00821264	1.11485	1.615
Animal #12	0.0488361	2.97297	3.9583
Animal #13	0.0280735	6.0912	4.50544
Animal #14	0.0210408	0.204672	0.105663
Animal #15	0.0727696	3.16289	2.83062
Animal #16	0.0349806	5.37162	0.536209
Animal #17	0.0906256	3.44216	2.67461
Animal #18	0.0329718	19.8219	2.31625
Effect on Gamma High frequency band (60-90 Hz) evaluated from the LFP signal in the pre (100 ms), Light (500 ms) or post (100 ms) stimulus window (Panel h)
Animal Number	Pre	Light	Post
Animal #1	0.00175521	0.153941	0.0174855
Animal #2	0.0004382	0.168992	0.018168
Animal #3	0.00624304	0.189246	0.0335989
Animal #4	0.00200291	0.0752905	0.0825633
Animal #5	0.00443488	0.474582	0.192605
Animal #6	0.000929409	0.0168412	0.0132214
Animal #7	0.00675029	0.113757	0.0355742
Animal #8	0.0185115	1.47485	1.17023
Animal #9	0.00327002	0.0215103	0.0562878
Animal #10	0.00081023	0.0525514	0.14744
Animal #11	0.00130793	0.153954	0.144965
Animal #12	0.0122503	0.394993	0.343233
Animal #13	0.0044641	1.118	0.423069
Animal #14	0.0049138	0.0444076	0.0178237
Animal #15	0.01692	0.469197	0.50155
Animal #16	0.00429633	0.850253	0.0412975
Animal #17	0.023702	0.821787	0.533674
Animal #18	0.0126317	2.7019	0.247256
Effect on Spike Frequency evaluated from the MU signal in the pre (100 ms), Light (500 ms) or post (100 ms) stimulus window (Panel j)
Animal Number	Pre	Light	Post
Animal #1	0	25.5556	2.22222
Animal #2	0	228.4	102
Animal #3	0	221.2	84
Animal #4	0	140	96
Animal #5	0	89.2	44
Animal #6	0	59.8	55
Animal #7	0	13.6	0
Animal #8	0	94	68
Animal #9	0	115.6	130
Animal #10	0	38.6	40
Animal #11	0	82.8	93
Animal #12	0	89.8	53
Animal #13	0	64.6	28
Animal #14	0	24.6	11
Animal #15	0	71.4	33
Animal #16	0	39	15
Animal #17	0	41.3333	10
Animal #18	0	60.8	6
