# Supplementary material for: An inhibitory gate for state transition in cortex
Source: eLife. 2017 May 16;6:e26177. doi: 10.7554/eLife.26177 (PMC5444901; doi:10.7554/eLife.26177)
Supplement: Figure 4—source data 1. — DOI: http://dx.doi.org/10.7554/eLife.26177.029 [file elife-26177-fig4-data1.xlsx]

## Sheet: Sheet1
Figure 4 - Source Data 1
Title:	Source data for the analysis of membrane potential changes during photoinhibition of PV or SST interneurons.
PV inhibition during ongoing Up state in anesthetized mice (Panel c, left)							PV inhibition during ongoing Up state in non-anesthetized mice (Panel c, right)
Cell Number	Pre	Light	Post				Cell Number	Pre	Light	Post
Cell #1	22.9641	21.1209	12.2481				Cell #1	15.5212	11.8539	9.47168
Cell #2	24.2105	25.7917	20.8075				Cell #2	16.6093	9.86855	6.51263
Cell #3	24.0104	25.6769	20.0768				Cell #3	25.8582	15.4032	11.996
Cell #4	16.0786	14.787	4.85225				Cell #4	9.27077	11.5443	7.77097
Cell #5	20.393	22.7253	11.1179				Cell #5	14.9727	15.8653	11.2021
Cell #6	21.5618	18.0198	6.68878				Cell #6	20.8701	12.1886	7.66816
Cell #7	20.6629	16.5823	9.63236				Cell #7	17.7536	11.7171	9.71449
Cell #8	17.9989	14.6646	6.3578				Cell #8	15.0686	12.4796	9.87311
Cell #9	25.3021	20.0395	8.68294				Cell #9	14.0559	16.26	13.9636
Cell #10	20.4939	15.7837	6.10047				Cell #10	19.6573	15.298	9.21638
Cell #11	23.4757	20.2214	8.22971
PV inhibition during ongoing Down state in anesthetized mice (Panel e, left)							PV inhibition during ongoing Down state in non-anesthetized mice (Panel e, right)
Cell Number	Pre	Light	Post				Cell Number	Pre	Light	Post
Cell #1	0.17627	18.4624	22.335				Cell #1	-0.432363	8.85161	9.31804
Cell #2	0.97756	18.7384	18.2496				Cell #2	-0.41756	11.4752	7.67236
Cell #3	-0.33088	19.5236	24.261				Cell #3	0.447435	14.7548	12.6365
Cell #4	-0.06654	15.6477	7.5856				Cell #4	0.891754	12.6229	4.97754
Cell #5	-0.37655	18.4251	10.5308				Cell #5	1.12576	13.1892	9.12622
Cell #6	0.59648	15.9063	15.6407				Cell #6	-0.706925	11.0535	4.78418
Cell #7	-0.226	13.6151	12.2961				Cell #7	-0.123586	12.9783	7.20522
Cell #8	-0.19356	14.6798	6.96265				Cell #8	-0.241752	14.0533	10.805
Cell #9	-0.52634	22.0937	11.2981
Cell #10	-0.03876	15.3993	8.30871
Cell #11	0.34002	19.9901	14.8316
SST inhibition during ongoing Up state in anesthetized mice (Panel h, left)							SST inhibition during ongoing Up state in non-anesthetized mice (Panel h, right)
Cell Number	Pre	Light	Post				Cell Number	Pre	Light	Post
Cell #1	20.8574	22.579	10.1725				Cell #1	14.8525	23.786	8.52068
Cell #2	12.2522	14.0558	6.94168				Cell #2	13.5428	14.1559	4.71709
Cell #3	17.0079	16.521	7.07422				Cell #3	16.3145	17.0352	3.71508
Cell #4	22.4035	24.6178	11.2277				Cell #4	19.932	19.2726	5.63418
Cell #5	24.8743	25.1483	12.154				Cell #5	14.5555	15.9072	5.13189
Cell #6	22.5973	29.2293	12.3123				Cell #6	16.746	16.3823	9.38668
Cell #7	12.6436	14.5402	8.86406				Cell #7	18.2409	27.9956	8.79469
Cell #8	24.2753	23.5998	11.4099				Cell #8	18.5763	17.1937	7.44772
Cell #9	24.074	26.7941	8.65565
SST inhibition during ongoing Down state in anesthetized mice (Panel j, left)							SST inhibition during ongoing Down state in non-anesthetized mice (Panel j, right)
Cell Number	Pre	Light	Post				Cell Number	Pre	Light	Post
Cell #1	0.06682	10.3686	12.2513				Cell #1	1.31668	26.8264	9.59111
Cell #2	0.17493	8.50589	10.9994				Cell #2	1.08342	13.1356	4.87439
Cell #3	0.16029	11.1245	11.6532				Cell #3	1.20716	13.7293	4.4225
Cell #4	-0.13933	10.4984	9.41245				Cell #4	0.38015	19.4667	5.76185
Cell #5	-0.34424	17.0274	14.155				Cell #5	0.50661	11.6783	10.3673
Cell #6	0.16761	11.7822	14.0879				Cell #6	2.11608	16.3707	8.12172
Cell #7	-0.21564	6.47714	6.38647				Cell #7	1.81025	25.8991	7.43423
Cell #8	0.02728	16.9538	10.8166				Cell #8	0.49967	15.512	6.36488
Cell #9	-0.09627	15.082	12.1741
