# Supplementary material for: An inhibitory gate for state transition in cortex
Source: eLife. 2017 May 16;6:e26177. doi: 10.7554/eLife.26177 (PMC5444901; doi:10.7554/eLife.26177)
Supplement: Figure 5—figure supplement 1—source data 1. — DOI: http://dx.doi.org/10.7554/eLife.26177.042 [file elife-26177-fig5-figsupp1-data1.xlsx]

## Sheet: Sheet1
Figure 5 - Figure Supplement 1 - Source Data 1
Title:	Source data for the analysis of the membrane potential speed during optogenetically-evoked and spontaneous down-to-up state transitions.
Membrane potential speed for optogenetically evoked and spontaneous down-to-up transitions during optogenetic manipulation of PV cells (panel c)
Cell #	Evoked	Spontaneous
Cell #1	0.31368	0.3091
Cell #2	0.33307	0.20624
Cell #3	0.39956	0.22582
Cell #4	1.18664	0.36469
Cell #5	1.70545	0.45567
Cell #6	1.93031	0.43834
Cell #7	1.66309	0.66614
Cell #8	2.12057	0.67516
Cell #9	1.78211	0.7595
Cell #10	1.43466	0.41296
Cell #11	1.46185	0.67741
Membrane potential velocity for optogenetically evoked and spontaneous down-to-up transitions during optogenetic manipulation of SST cells (panel f)
Cell #	Evoked	Spontaneous
Cell #1	0.20462	0.22881
Cell #2	0.19131	0.25975
Cell #3	0.45756	0.5124
Cell #4	0.22922	0.33384
Cell #5	0.63656	0.66036
Cell #6	0.45755	0.60523
Cell #7	0.30253	0.28042
Cell #8	0.54762	0.32201
Cell #9	0.86909	0.8173
