# Supplementary material for: An inhibitory gate for state transition in cortex
Source: eLife. 2017 May 16;6:e26177. doi: 10.7554/eLife.26177 (PMC5444901; doi:10.7554/eLife.26177)
Supplement: Figure 5—source data 1. — DOI: http://dx.doi.org/10.7554/eLife.26177.040 [file elife-26177-fig5-data1.xlsx]

## Sheet: Sheet1
Figure 5 - Source Data 1
Title:	Source data for the analysis of the interneuron type-specific effect of optogenetic inhibitory manipulations.
Firing frequency for optogenetic inhibition of PV cells during ongoing Up states in anesthetized mice (Panel b, left)											Firing frequency for optogenetic inhibition of PV cells during ongoing Down states in anesthetized mice (Panel b, right)
Cell Number	Pre	Light	Post								Cell Number	Pre	Light	Post
Cell #1	0.47	2.2	0.2								Cell #1	0.27	0.6	1.15
Cell #2	1	2.6	0.7								Cell #2	0.67	1.33	0.5
Cell #3	0.61	1.45	0.45								Cell #3	0.27	0.2	1
Cell #4	0.07	2.6	0.15								Cell #4	0	2.4	0.35
Cell #5	0.73	9.6	0.1								Cell #5	0.07	5.6	0.05
Cell #6	1.07	2.4	0.75								Cell #6	0.47	1	0.65
Cell #7	0.13	6.6	0.25								Cell #7	0.27	4.6	0.65
Cell #8	0.07	7.2	0.4								Cell #8	0.07	6.4	0.1
Cell #9	1.13	8	0.6								Cell #9	1	11	0.65
Cell #10	0.2	1.2	0.05								Cell #10	0	0.4	0.05
Cell #11	0.8	7.4	1.1								Cell #11	0.53	7.8	0.75
Firing frequency for optogenetic inhibition of PV cells during ongoing Up states in non-anesthetized mice (Panel d, left)											Firing frequency for optogenetic inhibition of PV cells during ongoing Down states in non-anesthetized mice (Panel d, right)
Cell Number	Pre	Light	Post								Cell Number	Pre	Light	Post
Cell #1	0	2.90909	0.0909091								Cell #1	0	1.86667	0.2
Cell #2	0	7.33333	0								Cell #2	0.666667	4.35714	2.5
Cell #3	0	8.14286	0								Cell #3	2.26667	15	2.15
Cell #4	0.0512821	3.23077	0								Cell #4	0.333333	1	0.5
Cell #5	0.238095	14.7143	0.464286								Cell #5	0.0833333	4	0
Cell #6	0.26087	1.82609	0.217391								Cell #6	0	5.5	0
Cell #7	0	3.25	0.125								Cell #7	0.222222	4.66667	0.166667
Cell #8	0.166667	6	1.0625								Cell #8	0	3	0
Cell #9	0.24	8.4	0.32
Cell #10	0	3.75	0
Firing frequency for optogenetic inhibition of SST cells during ongoing Up states in anesthetized mice (Panel g, left)											Firing frequency for optogenetic inhibition of SST cells during ongoing Down states in anesthetized mice (Panel g, right)
Cell Number	Pre	Light	Post								Cell Number	Pre	Light	Post
Cell #1	0.2	0	0.08								Cell #1	0.0666667	0	0.2
Cell #2	0	0	0								Cell #2	0	0	0
Cell #3	0	0	0								Cell #3	0	0	0
Cell #4	0.2	4	0.3								Cell #4	0.866667	0.6	0.8
Cell #5	0.0666667	0	0.25								Cell #5	0.2	0.4	0.1
Cell #6	0.0666667	3	0								Cell #6	0.0416667	0.25	0.125
Cell #7	0	0	0								Cell #7	0	0	0
Cell #8	0.733333	1	0.15								Cell #8	0.190476	0	0
Cell #9	1.33333	9.4	1.2								Cell #9	1.03704	3.11111	1.05556
Firing frequency for optogenetic inhibition of SST cells during ongoing Up states in non-anesthetized mice (Panel i, left)											Firing frequency for optogenetic inhibition of SST cells during ongoing Down states in non-anesthetized mice (Panel i, right)
Cell Number	Pre	Light	Post								Cell Number	Pre	Light	Post
Cell #1	0.25	5.75	0.875								Cell #1	0	8.8	1.4
Cell #2	0.0740741	0	0.166667								Cell #2	0	0	0
Cell #3	0.133333	0	0.15								Cell #3	0.296296	0.222222	0.0555556
Cell #4	2.84211	4.31579	2.18421								Cell #4	0.727273	5.27273	2
Cell #5	0.133333	0.4	0.05								Cell #5	0	0	0
Cell #6	0	0	0.3								Cell #6	0	0	0.0909091
Cell #7	0.242424	8	0.0909091								Cell #7	0	6.44444	0.0555556
Cell #8	0	0	0.0588235								Cell #8	0.266667	0.2	0
