# Supplementary material for: An inhibitory gate for state transition in cortex
Source: eLife. 2017 May 16;6:e26177. doi: 10.7554/eLife.26177 (PMC5444901; doi:10.7554/eLife.26177)
Supplement: Figure 6—figure supplement 1—source data 1. — DOI: http://dx.doi.org/10.7554/eLife.26177.046 [file elife-26177-fig6-figsupp1-data1.xlsx]

## Sheet: Sheet1
Figure 6 - Figure Supplement 1 - Source Data 1
Title:	Source data for the effect of local PV activation on network activity over large cortical territories.
MU activity was recorded simultanously recorded in two cortical regions. The stimulated area was close to Ch1 (red) while Ch2 (green) was located 2 mm apart from Ch1
Effect on MU firing frequency in Ch1 evaluated in the pre (100 ms) and post (100 ms) stimulus window (panel c)
Animal Number	Pre	Post
Animal #1	85	0
Animal #2	141.5	0.8
Animal #3	275	1
Animal #4	81.1	0
Animal #5	148.6	1.4
Animal #6	94	1
Animal #7	92.9	0
Animal #8	31.7	0
Animal #9	112	0
Animal #10	192	4
Effect on MU firing frequency in Ch2 evaluated in the pre (100 ms) and post (100 ms) stimulus window (panel e)
Animal Number	Pre	Post
Animal #1	91.3	40
Animal #2	107.7	90.8
Animal #3	253	44
Animal #4	33.3	2.2
Animal #5	185.7	64.3
Animal #6	63	6
Animal #7	225.7	18.6
Animal #8	58.3	55
Animal #9	148	10
Animal #10	169	43
