# Supplementary material for: An inhibitory gate for state transition in cortex
Source: eLife. 2017 May 16;6:e26177. doi: 10.7554/eLife.26177 (PMC5444901; doi:10.7554/eLife.26177)
Supplement: Figure 6—figure supplement 2—source data 1. — DOI: http://dx.doi.org/10.7554/eLife.26177.049 [file elife-26177-fig6-figsupp2-data1.xlsx]

## Sheet: Sheet1
Figure 6 - Figure Supplement 2 - Source Data 1
Title:	Source data for the large scale effect of PV activation on multiunit activity using spatially-restricted DMD-based illumination.
Effect on MU firing frequency in Ch1 evaluated in the pre (100 ms) and post (100 ms) stimulus window (panel d)
Animal Number	Pre	Post
Animal #1	40	0
Animal #2	157.8	7.8
Animal #3	28.8	1.3
Animal #4	98.9	0
Animal #5	36	0
Animal #6	52	0
Effect on MU firing frequency in Ch2 evaluated in the pre (100 ms) and post (100 ms) stimulus window (panel f)
Animal Number	Pre	Post
Animal #1	9	0
Animal #2	4.3	0.2
Animal #3	2.8	0.3
Animal #4	14	0.6
Animal #5	6	0.1
Animal #6	16.1	10.1
