# Supplementary material for: An inhibitory gate for state transition in cortex
Source: eLife. 2017 May 16;6:e26177. doi: 10.7554/eLife.26177 (PMC5444901; doi:10.7554/eLife.26177)
Supplement: Figure 6—figure supplement 2—source data 2. — DOI: http://dx.doi.org/10.7554/eLife.26177.050 [file elife-26177-fig6-figsupp2-data2.xlsx]

## Sheet: Sheet1
Figure 6 - Figure Supplement 2 - Source Data 2
Title:	Source data for large scale effect of SST activation on multiunit activity using spatially-restricted DMD-based illumination.
Effect on MU firing frequency in Ch1 evaluated in the pre (100 ms) and post (100 ms) stimulus window (panel i)
Animal Number	Pre	Post
Animal #1	72.9	0
Animal #2	188.6	1.4
Animal #3	42.7	0
Animal #4	60	3
Animal #5	113	0
Animal #6	75	2
Animal #7	85	0
Effect on MU firing frequency in Ch2 evaluated in the pre (100 ms) and post (100 ms) stimulus window (panel k)
Animal Number	Pre	Post
Animal #1	135.7	1.4
Animal #2	61.4	14.3
Animal #3	92.7	36.4
Animal #4	49	4
Animal #5	127	0
Animal #6	137	58
Animal #7	113	7
