# Supplementary material for: An inhibitory gate for state transition in cortex
Source: eLife. 2017 May 16;6:e26177. doi: 10.7554/eLife.26177 (PMC5444901; doi:10.7554/eLife.26177)
Supplement: Figure 6—figure supplement 4—source data 1. — DOI: http://dx.doi.org/10.7554/eLife.26177.053 [file elife-26177-fig6-figsupp4-data1.xlsx]

## Sheet: Sheet1
Figure 6 - Figure Supplement 4 - Source Data 1
Title:	Source data for the analysis of membrane potential changes in pyramidal neurons located 2 mm far from modulated PV and SST cells in awake mice.
PV activation during ongoing Up state: effect on cell located in Channel 2 (Panel c)
Cell Number	Pre	Light
Cell #1	17.3007	4.80117
Cell #2	17.9518	1.97521
Cell #3	24.322	3.24332
Cell #4	17.0161	3.11183
Cell #5	27.1949	5.44972
Cell #6	14.9585	5.2889
Cell #7	22.3234	5.41779
PV inhibition during ongoing Down state: effect on cells located in Channel 2 (Panel f)
Cell Number	Pre	Light	Post
Cell #1	-0.17425	7.91608	10.0558
Cell #2	0.91444	7.21028	9.89887
Cell #3	0.96933	9.3104	12.6848
Cell #4	0.8443	12.3392	10.9997
Cell #5	0.17857	6.53402	7.34194
Cell #6	1.10024	12.7457	8.96159
Cell #7	0.48004	7.1927	4.61569
SST activation during ongoing Up state: effect on cells located in Channel 1 (Panel i)
Cell Number	Pre	Light
Cell #1	15.2966	5.64625
Cell #2	15.9641	3.34625
Cell #3	20.9998	8.95035
Cell #4	26.1622	5.32821
Cell #5	16.7725	1.62943
Cell #6	17.5978	0.24666
SST inhibition during ongoing Down state: effect on cells located in Channel 1 (Panel l)
Cell Number	Pre	Light	Post
Cell #1	2.21872	16.3174	11.6571
Cell #2	0.17156	18.0082	17.7976
Cell #3	0.17042	12.9018	6.54728
Cell #4	0.92206	10.3706	3.60452
Cell #5	-0.14822	16.575	7.44231
Cell #6	0.51071	18.7173	7.34017
Cell #7	1.21718	17.0134	11.7853
Cell #8	0.74658	12.1202	11.2645
Cell #9	0.21416	8.46784	6.50422
