# Supplementary material for: An inhibitory gate for state transition in cortex
Source: eLife. 2017 May 16;6:e26177. doi: 10.7554/eLife.26177 (PMC5444901; doi:10.7554/eLife.26177)
Supplement: Figure 6—figure supplement 5—source data 1. — DOI: http://dx.doi.org/10.7554/eLife.26177.055 [file elife-26177-fig6-figsupp5-data1.xlsx]

## Sheet: Sheet1
Figure 6 - Figure Supplement 5 - Source Data 1
Title:	Source data for the effect of local PV inhibition on network activity over large cortical territories.
Effect on MU firing frequency in Ch1 evaluated in the pre (100 ms), Light (500 ms) and post (100 ms) stimulus window (panel c)
Animal Number	Pre	Light	Post
Animal #1	15.88	191.53	41.76
Animal #2	96	316.4	64.5
Animal #3	64	321.7	176
Animal #4	38.95	124.53	61.58
Animal #5	44.58	90.42	22.92
Animal #6	81.58	138.42	34.74
Animal #7	45	125.25	41.25
Animal #8	71.11	159.89	50
Animal #9	60	111.6	67
Animal #10	42.86	186.19	71.43
Animal #11	20.56	58.78	10
Animal #12	54.5	115.5	113
Effect on MU firing frequency in Ch2 evaluated in the pre (100 ms), Light (500 ms) and post (100 ms) stimulus window (panel e)
Animal Number	Pre	Light	Post
Animal #1	20	79.06	32.35
Animal #2	55.5	219	49.5
Animal #3	28.5	213.5	30
Animal #4	24.74	91.58	33.68
Animal #5	85	137	59.58
Animal #6	25.79	128.63	132.11
Animal #7	6.88	46	7.5
Animal #8	18.33	84.78	46.11
Animal #9	87	142.6	90.5
Animal #10	62.86	83.81	54.29
Animal #11	16.11	55.56	16.11
Animal #12	52.5	110.2	115
