# Supplementary material for: An inhibitory gate for state transition in cortex
Source: eLife. 2017 May 16;6:e26177. doi: 10.7554/eLife.26177 (PMC5444901; doi:10.7554/eLife.26177)
Supplement: Figure 6—figure supplement 5—source data 2. — DOI: http://dx.doi.org/10.7554/eLife.26177.056 [file elife-26177-fig6-figsupp5-data2.xlsx]

## Sheet: Sheet1
Figure 6 - Figure Supplement 5 - Source Data 2
Title:	Source Data 2: Source data for the effect of local SST inhibition on network activity over large cortical territories.
Effect on MU firing frequency in Ch1 evaluated in the pre (100 ms), Light (500 ms) and post (100 ms) stimulus window (panel h)
Animal Number	Pre	Light	Post
Animal #1	21	219.33	91.67
Animal #2	34	29.13	11.25
Animal #3	131	391.68	122.63
Animal #4	115	302	145
Animal #5	25	169.43	64.29
Animal #6	34	142.11	101.11
Animal #7	39	152.78	87.78
Animal #8	43	38.89	55.56
Animal #9	46	55.18	24.12
Animal #10	37	93.37	52.63
Animal #11	101	272.1	121
Animal #12	54	188.3	87
Animal #13	78	238.4	112.5
Effect on MU firing frequency in Ch2 evaluated in the pre (100 ms), Light (500 ms) and post (100 ms) stimulus window (panel j)
Animal Number	Pre	Light	Post
Animal #1	137.78	226.67	185
Animal #2	39.38	37.25	13.75
Animal #3	128.42	241.79	111.05
Animal #4	78	104.3	25
Animal #5	77.86	244.29	212.14
Animal #6	48.89	102.89	79.44
Animal #7	225	227	98.33
Animal #8	13.89	65.56	9.44
Animal #9	24.71	48.12	7.06
Animal #10	32.63	68	33.68
Animal #11	15.5	35.8	13.5
Animal #12	16.5	41.6	11.5
Animal #13	32	83.3	37.5
