# Supplementary material for: An inhibitory gate for state transition in cortex
Source: eLife. 2017 May 16;6:e26177. doi: 10.7554/eLife.26177 (PMC5444901; doi:10.7554/eLife.26177)
Supplement: Figure 6—figure supplement 6—source data 1. — DOI: http://dx.doi.org/10.7554/eLife.26177.058 [file elife-26177-fig6-figsupp6-data1.xlsx]

## Sheet: Sheet1
Figure 6 - Figure Supplement 6 - Source Data 1
Title:	Source data for the evaluation of light transmission through cortical tissue and of the density of opsin-positive cells.
Laser power drop as a function of tissue thickness (panel b)
Tissue Thickness (μm)	0	100	200	400	600	800	1000
Replicate #1	26.1	25	21	16	13	11	8.4
Replicate #2	26	24	22	17	14	10	8.5
Replicate #3	26.2	24	22	15.5	16	11	6.8
Replicate #4	26.05	25	21.5	15	14	9.5	8.5
Replicate #5	26	25	22	16.5	13	10	8
Replicate #6	26	25	21.5	17	13.5	10	5.5
PV and SST cell density (panel m)
Animal Number	Slice Number	PV	SST
Animal #1	Slice #1	199.434	159.516
Animal #1	Slice #2	242.82	166.564
Animal #1	Slice #3	239.312	170.965
Animal #1	Slice #4	227.008	180.085
Animal #2	Slice #1	273.267	144.835
Animal #2	Slice #2	208.293	165.975
Animal #2	Slice #3	234.205	139.499
Animal #2	Slice #4	283.421	145.172
Animal #3	Slice #1	181.63	178.472
Animal #3	Slice #2	226.038	200.419
Animal #3	Slice #3	183.844	215.956
Animal #3	Slice #4	155.918	181.265
Animal #4	Slice #1	170.415	149.791
Animal #4	Slice #2	158.571	147.001
Animal #4	Slice #3	168.286	141.486
Animal #4	Slice #4	146.403	144.698
