# Supplementary material for: An inhibitory gate for state transition in cortex
Source: eLife. 2017 May 16;6:e26177. doi: 10.7554/eLife.26177 (PMC5444901; doi:10.7554/eLife.26177)
Supplement: Figure 6—source data 1. — DOI: http://dx.doi.org/10.7554/eLife.26177.044 [file elife-26177-fig6-data1.xlsx]

## Sheet: Sheet1
Figure 6 - Source Data 1
Title:	Source data for the analysis of membrane potential changes in simultaneously recorded neurons during local optogenetic perturbation of PV and SST interneurons.
PV activation during ongoing Up state: effect on cells located in Channel 1 (Panel c, Upper)							PV activation during ongoing Up state: effect on cells located in Channel 2 (Panel c, Lower)
Cell Number	Pre	Light					Cell Number	Pre	Light
Cell #1	14.7375	4.48398					Cell #1	22.3539	9.10698
Cell #2	15.7808	-0.97089					Cell #2	18.2792	8.76764
Cell #3	24.056	9.13045					Cell #3	16.219	1.32586
Cell #4	18.1873	6.46485					Cell #4	17.6971	5.08028
Cell #5	21.4549	7.59614					Cell #5	10.1632	4.26468
Cell #6	20.3214	8.7375					Cell #6	9.35521	5.80576
Cell #7	20.7976	4.71792					Cell #7	16.9074	6.1097
PV inhibition during ongoing Down state: effect on cells located in Channel 1 (Panel f, Upper)							PV inhibition during ongoing Down state: effect on cells located in Channel 2 (Panel f, Lower)
Cell Number	Pre	Light	Post				Cell Number	Pre	Light	Post
Cell #1	-0.42239	13.9828	8.91739				Cell #1	0.35144	11.906	12.232
Cell #2	0.08671	17.8582	14.966				Cell #2	0.86423	17.1636	14.5562
Cell #3	0.34516	17.5257	14.7855				Cell #3	0.69584	16.9793	13.8556
Cell #4	0.55972	20.097	20.8936				Cell #4	0.66777	9.96183	8.60788
Cell #5	-0.44595	21.7411	15.17				Cell #5	0.08256	17.1973	10.8927
Cell #6	-0.21122	8.34531	10.1012				Cell #6	0.16059	12.6177	18.0342
SST activation during ongoing Up state: effect on cells located in Channel 1 (Panel i, Upper)							SST activation during ongoing Up state: effect on cells located in Channel 2 (Panel i, Lower)
Cell Number	Pre	Light					Cell Number	Pre	Light
Cell #1	16.4532	3.51452					Cell #1	14.8619	5.03557
Cell #2	24.397	5.6502					Cell #2	20.0041	4.43014
Cell #3	20.3277	5.1263					Cell #3	20.3371	6.9783
Cell #4	21.0973	5.26512					Cell #4	20.2802	7.23684
Cell #5	25.2866	12.3848					Cell #5	17.8775	7.85919
Cell #6	20.0929	6.33533					Cell #6	18.5489	10.3211
Cell #7	24.151	6.75488					Cell #7	17.9792	6.32124
Cell #8	21.3703	6.45741					Cell #8	24.6437	7.86766
SST inhibition during ongoing Down state: effect on cells located in Channel 1 (Panel l, Upper)							SST inhibition during ongoing Down state: effect on cells located in Channel 2 (Panel l, Lower)
Cell Number	Pre	Light	Post				Cell Number	Pre	Light	Post
Cell #1	0.43667	17.4465	14.9993				Cell #1	0.06462	10.4986	5.2758
Cell #2	0.06143	11.5024	5.81187				Cell #2	0.20046	8.7625	6.2242
Cell #3	0.18465	14.5013	8.65732				Cell #3	0.24276	8.87823	6.98695
Cell #4	1.01866	14.2815	10.6476				Cell #4	0.50762	12.4603	9.29677
Cell #5	0.49913	12.1315	13.1631				Cell #5	0.50955	10.3727	11.3284
Cell #6	0.13328	12.7755	14.484				Cell #6	-0.88736	13.9649	14.4663
Cell #7	0.00982	9.38427	7.15502				Cell #7	-0.12912	15.9504	16.8868
