# Supplementary material for: Reactor vessel neutron fluence reduction measures taken at Palisades
Source: eLife journal article supplement (doi:10.7554/elife.26177), 1994-12-31
Supplement: supp [file xlsChR2Template.xlsx]

## Sheet: MUA Analysis Statistics
Sweep number	Win duration		Nspikes		FR
	Pre	Post	Pre	Post	Pre	Post

## Sheet: LFP Spectral Analysis
Sweep number	delta		alpha		gamma low		gamma high
	pre	post	pre	post	pre	post	pre	post

## Sheet: LFP Spectral Analysis Spec
Sweep number	delta		alpha		gamma low		gamma high
	pre	post	pre	post	pre	post	pre	post
